# Supplementary material for: Insights into the Mechanistic Basis of Plasmid-Mediated Colistin Resistance from Crystal Structures of the Catalytic Domain of MCR-1
Source: PubMed Central journal article supplement (PMC5216409; doi:10.1038/srep39392), 2017-01-06
Supplement: srep39392-s1.pdf [file srep39392-s1.pdf]

Supplementary Information for

## **Insights into the Mechanistic Basis of Plasmid-Mediated Colistin Resistance from the Crystal Structure of the Catalytic Domain of MCR-1**

Philip Hinchliffe, Qiu E. Yang, Edward Portal, Tom Young, Hui Li, Catherine L. Tooke, Maria J. Carvalho, Neil G. Paterson, Jürgen Brem, Pannika R. Niumsup, Uttapoln Tansawai, Lei Lei, Mei Li, Zhangqi Shen, Yang Wang, Christopher J. Schofield, Adrian J Mulholland, Jianzhong Shen, Natalie Fey, Timothy R. Walsh and James Spencer.

### **Figures**

Supplementary Figure S1. Superposition of the  $P4_12_12$  and  $P2_1$  MCR-1 structures.

Supplementary Figure S2. The MCR-1 crystallographic dimer.

Supplementary Figure S3. X-ray fluorescence scan of MCR-1 crystals.

Supplementary Figure S4. Mass Spectrum of the soluble MCR-1 domain used in crystallographic studies.

Supplementary Figure S5. Hydrophobicity and charge distribution over MCR-1.

Supplementary Figure S6. Colistin concentration-killing curves against bacterial isolates.

Supplementary Figure S7. Active site architecture of MCR-1 compared with structurally related enzymes.

Supplementary Figure S8: Comparison of mono and di-zinc MCR-1 crystal structures with the multi-zinc MCR-1 structure 5K4P.

### **Tables**

Supplementary Table S1. Data collection and refinement statistics

Supplementary Table S2. Zinc-coordination distances in Å

Supplementary Table S3. Details of Bacterial Strains used in Minimal Inhibitory Concentration (MIC) Experiments

Supplementary Table S4. Colistin MICs of *E. coli* TOP10 Expressing *mcr-1* Mutants

Supplementary Table S5. Primers used in this study

### **Computational Details**

#### **DFT Calculation Results**

*Including:*

Supplementary Figure S9: Density Functional Theory (DFT) Modelling of MCR-1 Active Site (Di-Zn(II) form).

Supplementary Table S6a: Structural comparison of Phosphorylated mono-Zn(II) active site geometries (see later discussion of possible protonation states, Scheme S1 for labelling used).

Supplementary Table S6b. Structural comparison of Di-Zn(II) active site geometry (see Scheme S2 for details of intermediates).

*DFT analysis of the mono-Zn(II) mechanism*

Scheme S1: Mechanistic postulate for mono-Zn mechanism. 1Zn-2 to 1Zn-3D and 1Zn-3E proceed via transition states 1Zn-TS1<sub>D</sub> and 1Zn-TS1<sub>E</sub> respectively.

Supplementary Table S7: Key structural parameters for the mono-Zn mechanism active site (distances given in Å).

Supplementary Table S8: Calculated relative potential energies in kcal mol<sup>-1</sup> for mono-Zn mechanism shown in Scheme S1.

*DFT analysis of the Di-Zn(II) mechanism*

Scheme S2: Mechanistic postulate for di-Zn mechanism. 2Zn-2 to 2Zn-3D and 2Zn-3E proceed via transition states 2Zn-TS1<sub>D</sub> and 2Zn-TS1<sub>E</sub> respectively.

Supplementary Table S9: Important structural parameters for the di-Zn mechanism active site (distances given in Å, see Scheme S2 for atom labelling).

Supplementary Table S10: Calculated relative potential energies in kcal mol<sup>-1</sup> for di-Zn mechanism shown in Scheme S2

## References

## Data

Coordinates for all DFT-optimised geometries

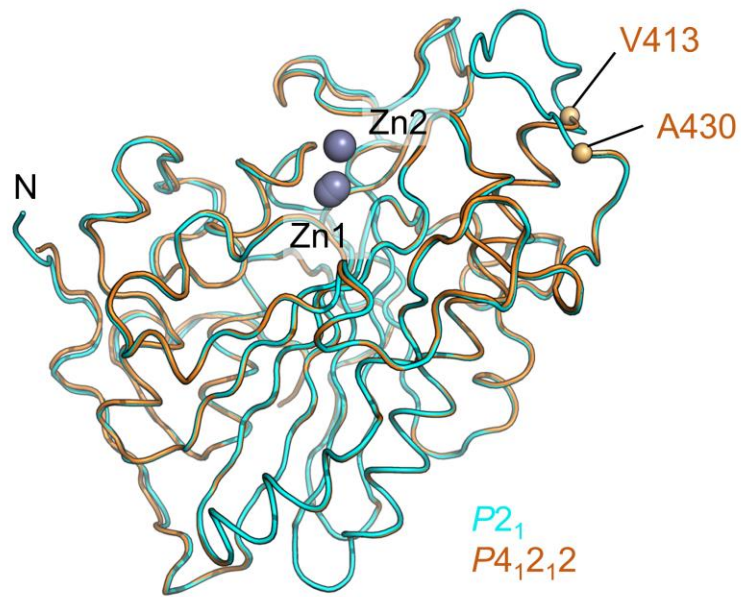

**Supplementary Figure S1. Superposition of the  $P4_12_12$  and  $P2_1$  MCR-1 structures.**

The  $P4_12_12$  MCR-1 monomer (orange) is superposed to chain A of the  $P2_1$  monomer (cyan). The N-termini are labelled and Zinc ions are shown as grey spheres and labelled Zn1 (common to both  $P2_1$  and  $P4_12_12$  structures) and Zn2 ( $P4_12_12$  only). Residues between V413 and A430 in the  $P4_12_12$  monomer could not be modelled due to poorly-defined electron density, while in the  $P2_1$  structure this loop could be modelled into well-defined electron density.

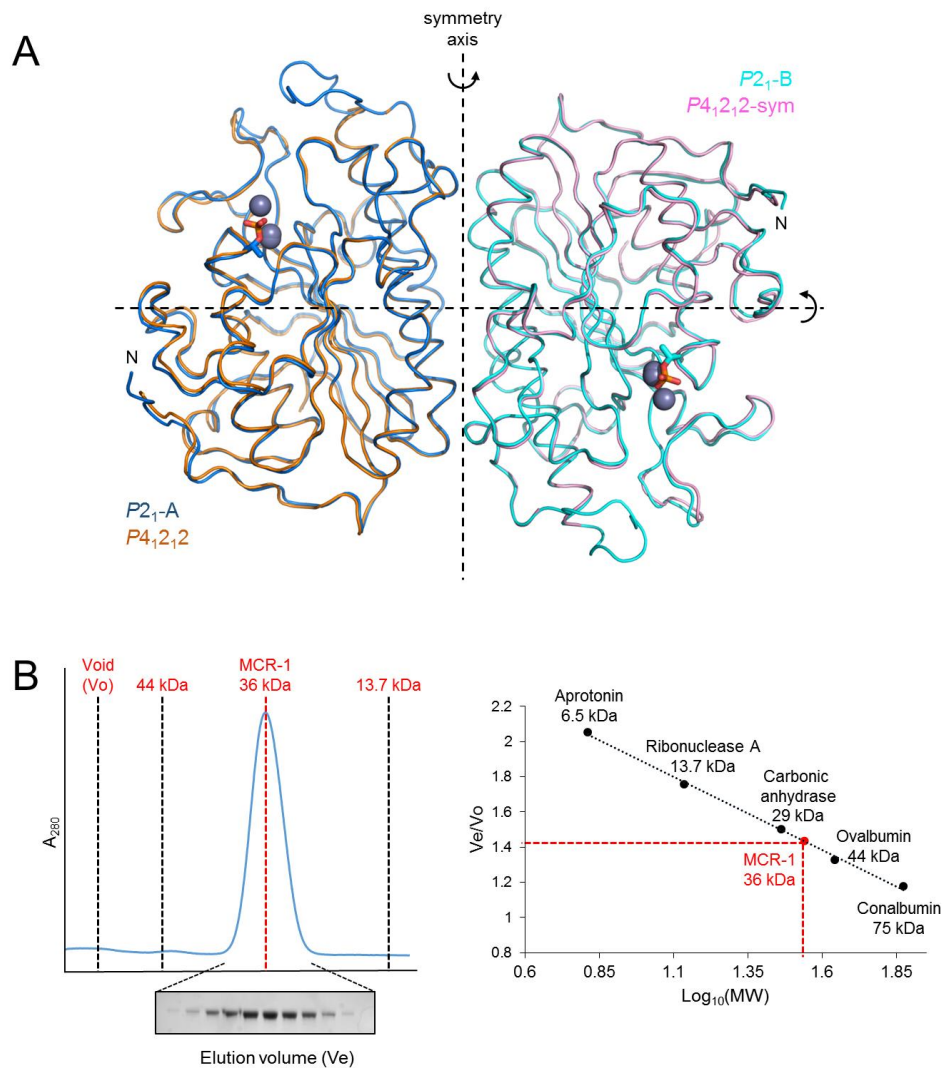

### Supplementary Figure S2. The MCR-1 crystallographic dimer.

(A) Superposition of the  $P2_1$  asymmetric unit (ASU) dimer (blue and cyan, chain A and B, respectively) with a dimer formed in the  $P4_12_12$  crystal lattice (orange and pink for the ASU monomer and the symmetry related molecule, respectively). The two four-fold symmetry related dimers are essentially identical (RMSD=0.48 over 621 C $\alpha$ ). The Zinc atoms (grey spheres) and phosphothreonine residue (sticks) indicate the position of the active site.

(B) Size exclusion chromatography of purified MCR-1 catalytic domain. *Left*, absorption (280 nm) is shown in blue, with the peak marked by a red line. SDS-PAGE analysis of peak fractions is shown below. Dotted lines indicate the elution volume of the void and two standards (ovalbumin, 44 kDa and ribonuclease A, 13.7 kDa). The experiment was performed three times; data from a representative experiment are shown. *Right*, Calibration plot. The  $\text{Log}_{10}$  of five molecular weight standards (black circles) is plotted against  $V_e/V_o$  (elution volume divided by column void volume). The line of best fit ( $R^2 = 0.998$ ) was then used to calculate the apparent molecular weight of MCR-1 (red circle). This showed that the catalytic domain of MCR-1 elutes at an apparent molecular mass of 36 kDa, consistent with the monomeric form.

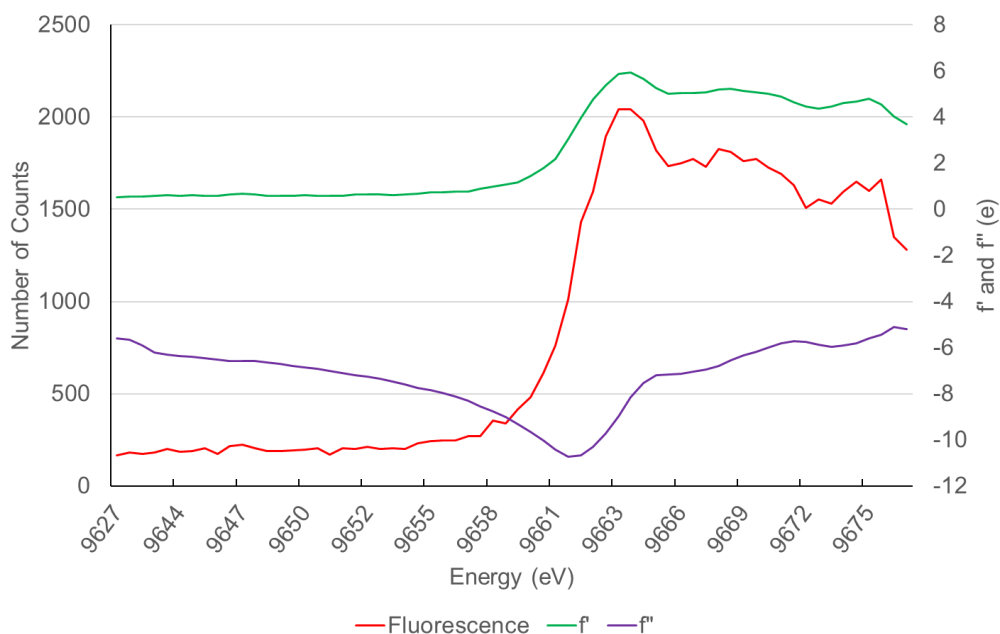

### Supplementary Figure S3. X-ray fluorescence scan of MCR-1 crystals.

MCR-1 crystals ( $P4_12_12$  form) were washed in zinc-free cryoprotectant before being looped and flash frozen in liquid nitrogen. The crystal was scanned (Diamond beamline I03) between the energies 9626 and 9685 eV. Measured fluorescence is shown as a red line and  $f'$  and  $f''$  values are shown as green and purple lines, respectively. The peak was measured at 9664.040039 eV ( $f'$ : 5.92 /  $f''$ : -8.15 e), consistent with a zinc signal. The scan was measured once from the single crystal used for multiwavelength data collection (see Supplementary Table 1 for details).

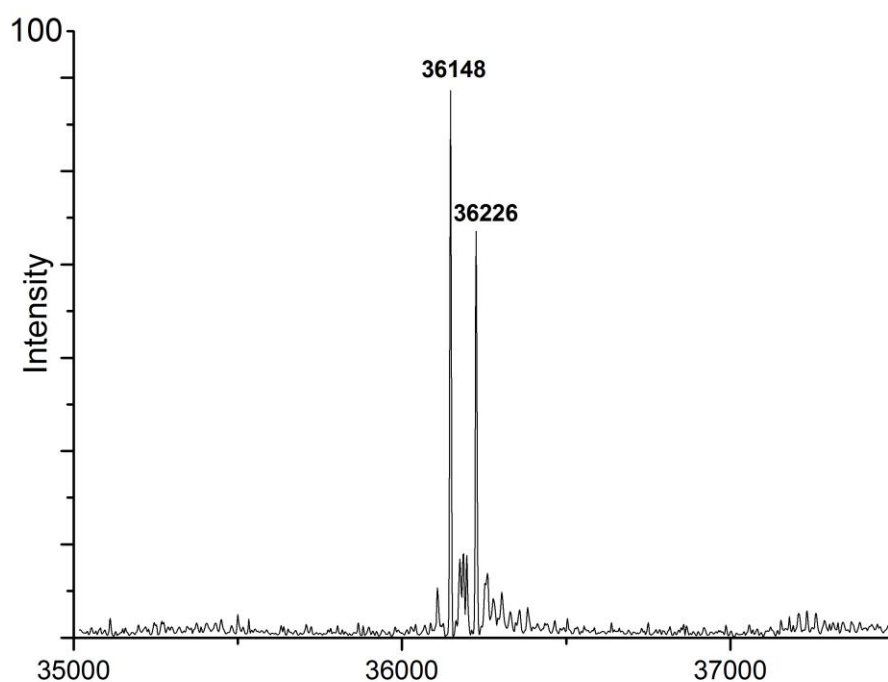

**Supplementary Figure S4. Mass Spectrum of the soluble MCR-1 domain used in crystallographic studies.**

The electrospray ionisation mass spectrometry (ESI-MS) spectrum of MCR-1 used in crystallographic studies revealed two peaks at 36148 Da and 36226 Da consistent with native (predicted mass from sequence 36 152 Da) and auto-phosphorylated protein, respectively. The experiment was performed three times; data from a representative experiment are shown.

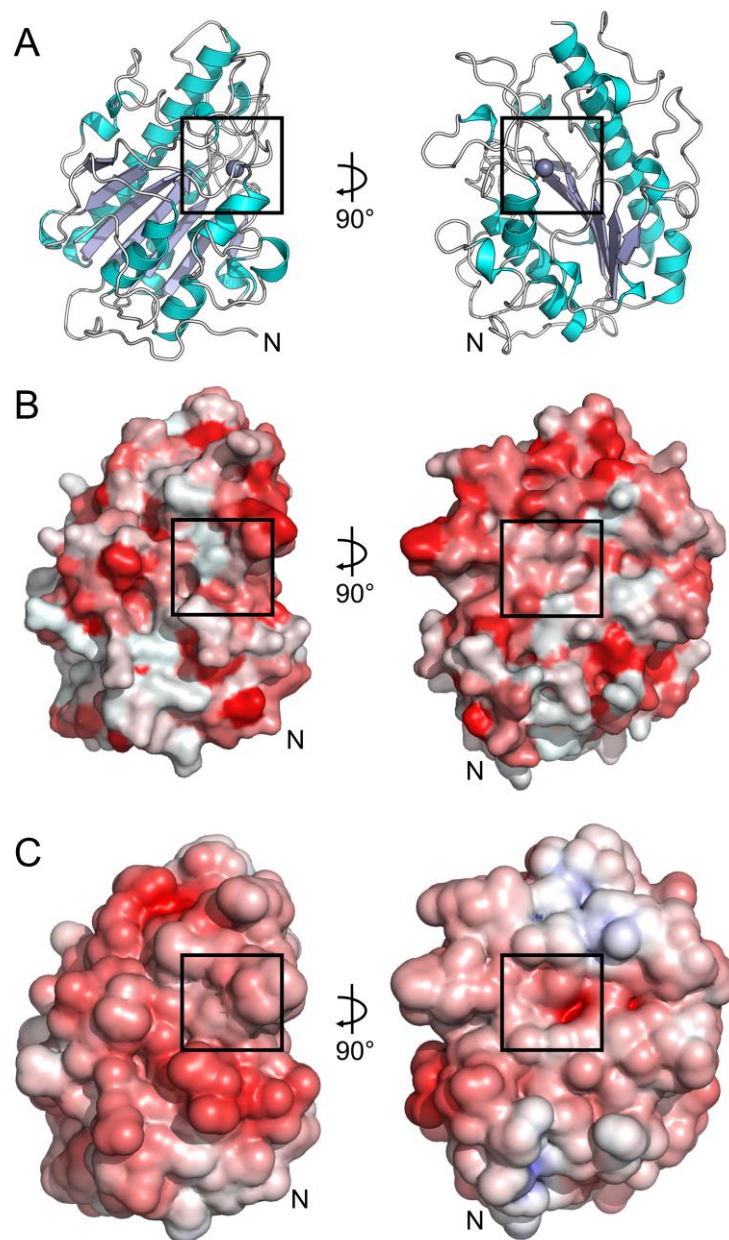

**Supplementary Figure S5. Hydrophobicity and charge distribution over MCR-1.**

(A) Two views (rotated by 90°) of the  $P2_1$  structure of MCR-1, coloured as in main text Figure 2. The black box denotes the position of the active site.

(B) Hydrophobicity of the surface residues of the MCR-1 catalytic domain. View in the same orientation as (A) with the surface coloured white (hydrophilic) to red (hydrophobic) based on the Eisenberg hydrophobicity scale<sup>1</sup>.

(C) Charge distribution over the surface of the MCR-1 catalytic domain. View in the same orientation as (A) with the surface shown with positively and negatively charged areas coloured blue and red, respectively. Electrostatic surface potentials were calculated using the program APBS<sup>2</sup> and contoured at  $\pm 8$  kT/e.

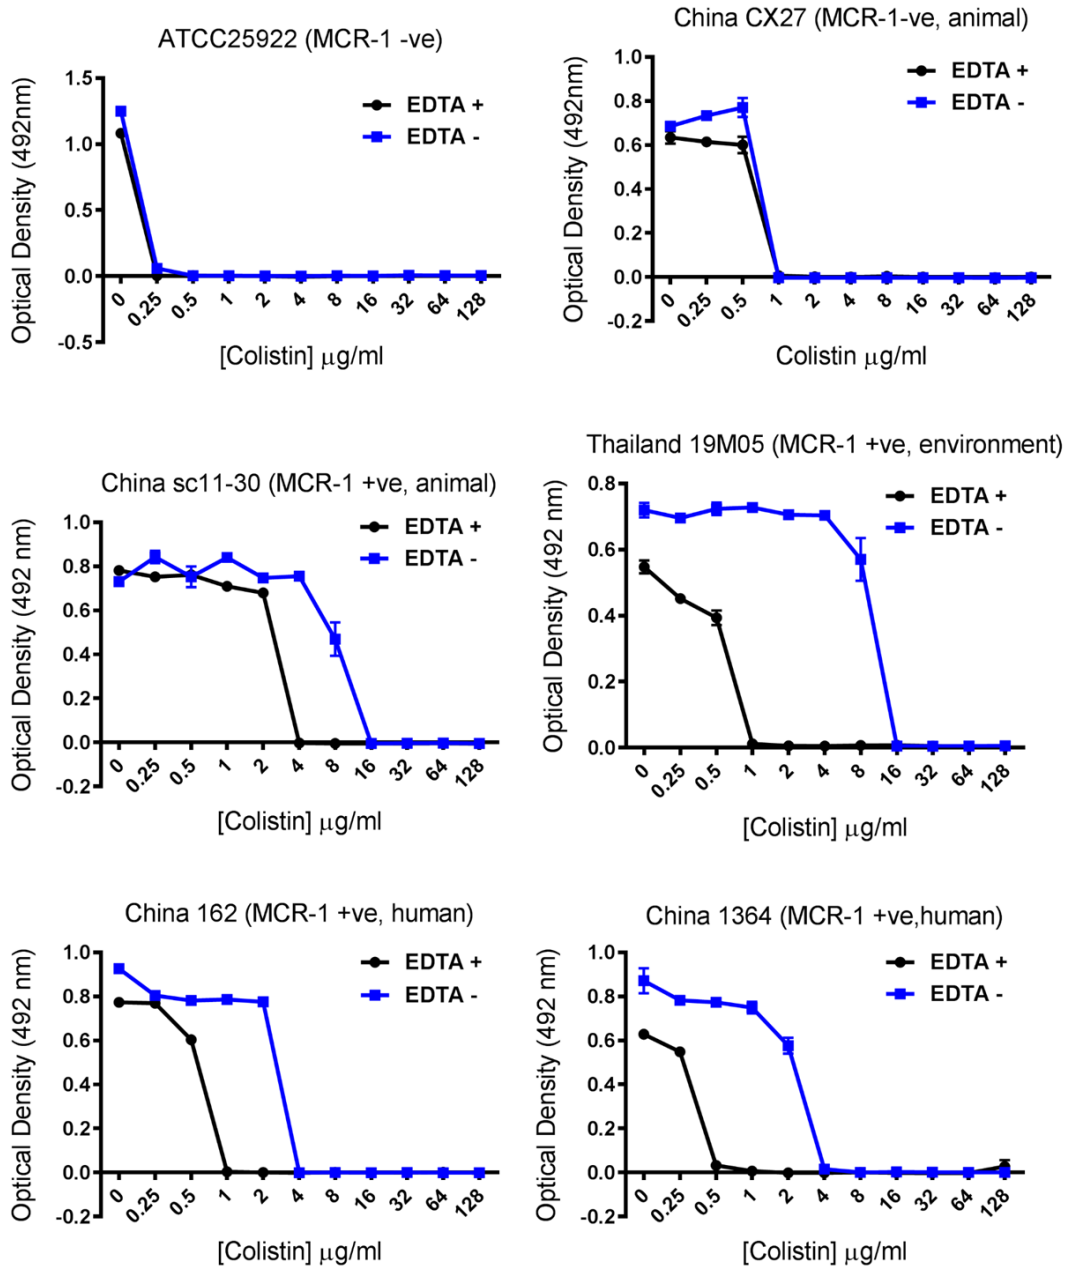

**Supplementary Figure S6. Colistin concentration-killing curves against bacterial isolates.**

Effect of colistin concentration in the presence or absence of EDTA on the growth of representative *E. coli* strains either harbouring (MCR-1 +ve) or lacking (MCR-1 -ve) MCR-1. Data shown are from experiments performed in duplicate. Error bars represent standard deviations.



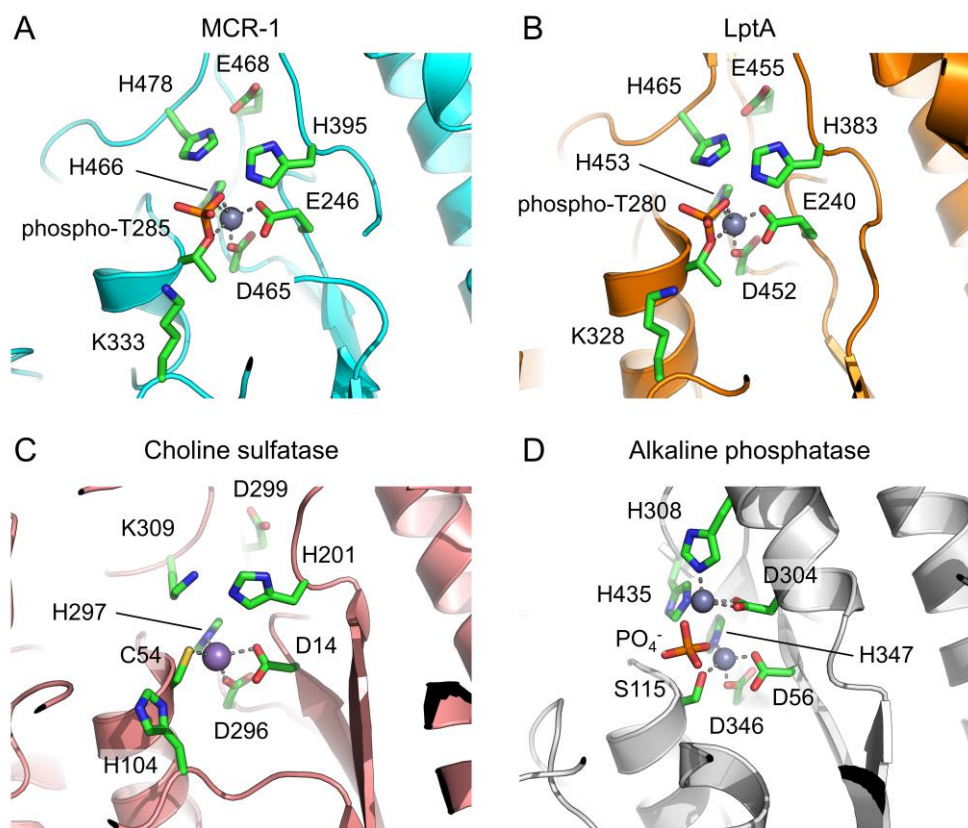

**Supplementary Figure S7. Active-site architecture of MCR-1 compared with structurally related enzymes.**

Representative structures from three different enzyme classes were superposed upon MCR-1 using secondary structure matching, and the active site of each is shown in the same orientation. Metals are shown as grey spheres and key active site residues (green sticks) are labelled. Metal coordination bonds are shown as grey dashes. Residues are numbered according to the respective PDB files.

(A) Mono-zinc MCR-1 (cyan,  $P2_1$  form with phosphothreonine).

(B) Phosphoethanolamine transferase LptA from *Neisseria meningitidis* (PDB ID 4KAV<sup>3</sup>, orange; monozinc, phosphothreonine form). RMSD to MCR-1 is 1.9 Å over 302 C $\alpha$  residues, with 40% sequence identity. MCR-1 residues highlighted in (A) are all strictly conserved in LptA.

(C) Choline sulfatase from *Sinorhizobium melliloti* (PDB ID 4UG4, light red). RMSD to MCR-1 is 2.9 Å over 270 C $\alpha$  residues with 16% sequence identity. The structure contains a single manganese site coordinated by C54, D14, D296 and H297. H201, K309, D299, and H104 structurally align with the MCR-1 residues H395, H478, E468, K333, respectively.

(D) Alkaline phosphatase from *Halobacterium salinarum* (PDB ID 2X98<sup>4</sup>, grey). RMSD to MCR-1 is 3.0 Å over 229 C $\alpha$  residues with 12% sequence identity. A single zinc site is coordinated by S115, D346, D56 and H347 and a free phosphate group (PO<sub>4</sub><sup>-</sup>). The second zinc site (coordinated by H308, H435 and D304) is structurally distinct from the second zinc site of MCR-1 which is coordinated by H478 and H395 (see main text Figure 2C).

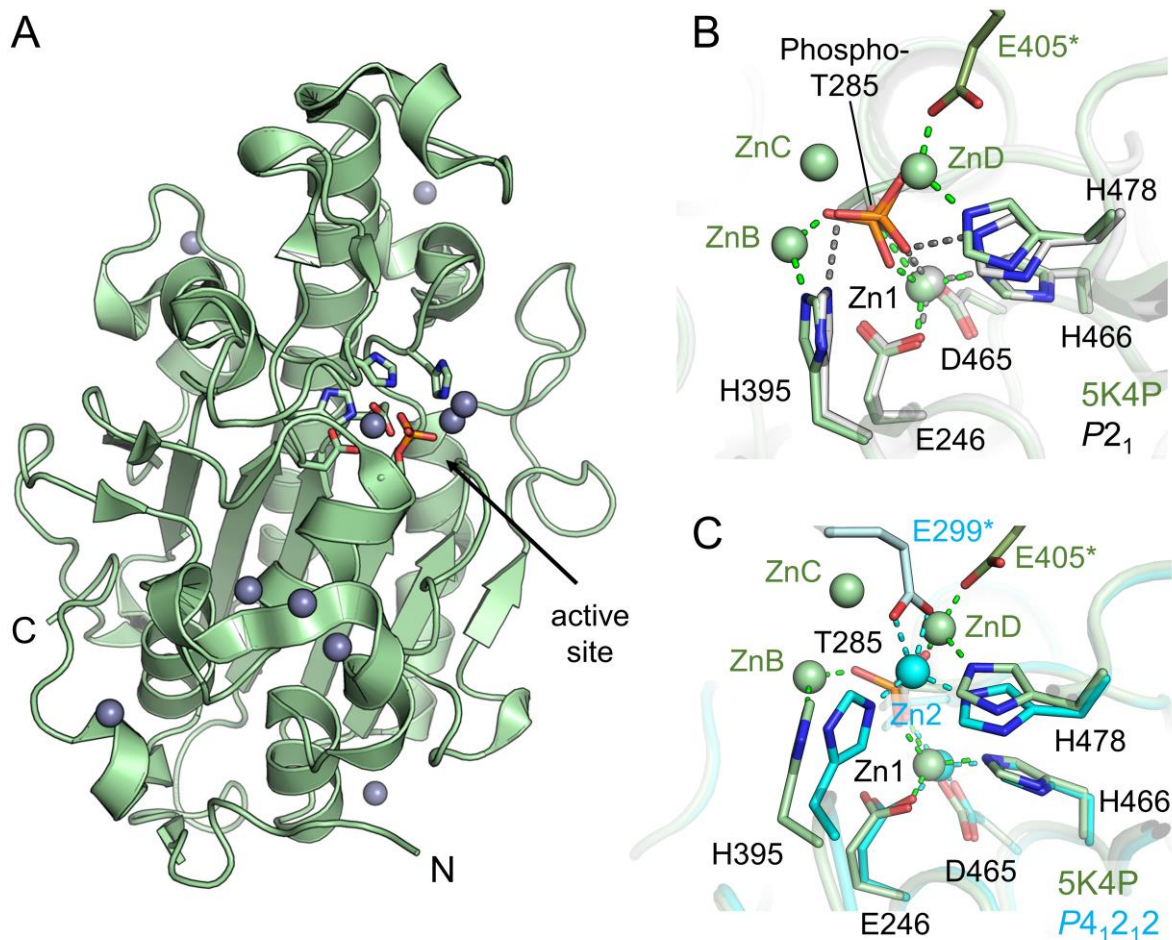

**Supplementary Figure S8: Comparison of mono and di-zinc MCR-1 crystal structures with the multi-zinc MCR-1 structure 5K4P.**

A. Overall fold of multi-zinc MCR-1 (green, PDB 5K4P), with the ten zinc sites shown as grey spheres, and zinc-binding residues as sticks. B. Close-up view of the active site of a superposition of monozinc ( $P2_1$ ) MCR-1 (grey) with 5K4P (green). The 5K4P zinc ions (green spheres) are labelled Zn1, ZnB, ZnC and ZnD. The  $P2_1$  zinc ion (grey sphere) is labelled Zn1. C. Close-up view of the active site of a superposition of dizinc ( $P4_12_12$ ) MCR-1 (cyan) with 5K4P (green). 5K4P zinc ions are coloured and labelled as B. The  $P4_12_12$  zinc ions (cyan spheres) are labelled Zn1 and Zn2.

## Supplementary Tables

**Supplementary Table S1. Data collection and refinement statistics**

|                                                     | Zn-edge                             | di-zinc<br>native                   | monozinc/phosphothreonine<br>native |
|-----------------------------------------------------|-------------------------------------|-------------------------------------|-------------------------------------|
| <b>Data collection</b>                              |                                     |                                     |                                     |
| Space group                                         | <i>P4<sub>1</sub>2<sub>1</sub>2</i> | <i>P4<sub>1</sub>2<sub>1</sub>2</i> | <i>P2<sub>1</sub></i>               |
| No. of datasets                                     | 4                                   | 1                                   | 1                                   |
| Molecules/ASU                                       | 1                                   | 1                                   | 2                                   |
| Cell dimensions                                     |                                     |                                     |                                     |
| <i>a</i> , <i>b</i> , <i>c</i> (Å)                  | 48.59, 48.59, 246.79                | 49.07, 49.07, 244.23                | 52.20, 82.33, 81.74                 |
| $\alpha$ , $\beta$ , $\gamma$ (°)                   | 90.00, 90.00, 90.00                 | 90.00, 90.00, 90.00                 | 90.00, 104.42, 90.00                |
| Wavelength(s) (Å)                                   | 1.282, 1.282, 1.2825,<br>1.2822     | 0.97833                             | 0.97831                             |
| Resolution (Å)*                                     | 28.54 – 2.50 (2.60 –<br>2.50)       | 48.85 – 1.75 (1.79 –<br>1.75)       | 50.56 – 1.55 (1.59 – 1.55)          |
| <i>R</i> <sub>pim</sub>                             | 0.032 (0.155)                       | 0.029 (0.512)                       | 0.097 (0.670)                       |
| CC <sub>1/2</sub>                                   | 0.999 (0.990)                       | 0.998 (0.925)                       | 0.993 (0.519)                       |
| <i>I</i> / $\sigma$ ( <i>I</i> )                    | 25.8 (10.4)                         | 15.1 (2.3)                          | 9.3 (1.9)                           |
| Completeness (%)                                    | 99.9 (100.0)                        | 100.0 (99.6)                        | 98.0 (96.7)                         |
| Redundancy                                          | 54.2 (54.7)                         | 15.5 (14.8)                         | 6.7 (6.8)                           |
| <b>Phasing Calculations</b>                         |                                     |                                     |                                     |
| FOM <sup>1</sup>                                    | 0.31                                | -                                   | -                                   |
| FOM after DM <sup>2</sup>                           | 0.66                                | -                                   | -                                   |
| <b>Refinement</b>                                   |                                     |                                     |                                     |
| Resolution (Å)                                      | -                                   | 48.09 – 1.75                        | 50.56 – 1.55                        |
| No. reflections                                     | -                                   | 31329                               | 94874                               |
| <i>R</i> <sub>work</sub> / <i>R</i> <sub>free</sub> | -                                   | 16.88 / 19.8                        | 16.51 / 18.88                       |
| No. atoms                                           | -                                   |                                     |                                     |
| Protein                                             | -                                   | 2450                                | 5147                                |
| Solvent                                             | -                                   | 183                                 | 910                                 |
| Zn                                                  | -                                   | 2                                   | 2                                   |
| <i>B</i> -factors                                   |                                     |                                     |                                     |
| Protein                                             | -                                   | 39.9                                | 18.7                                |
| Solvent                                             | -                                   | 46.0                                | 33.9                                |
| Zn                                                  | -                                   | 36.2                                | 14.3                                |
| R.m.s. deviations                                   |                                     |                                     |                                     |
| Bond lengths (Å)                                    | -                                   | 0.011                               | 0.011                               |
| Bond angles (°)                                     | -                                   | 1.163                               | 1.227                               |
| Ramachandran (%)                                    |                                     |                                     |                                     |
| Outliers                                            | -                                   | 0.32                                | 0.31                                |
| Favoured                                            | -                                   | 97.09                               | 98.02                               |

\*Values in parentheses are for highest-resolution shell.

<sup>1</sup>Figure of merit

<sup>2</sup>Figure of merit after density modification

**Supplementary Table S2. Zinc-coordination distances in Å**

| residue         | atom | <i>P4<sub>1</sub>2<sub>1</sub>2</i> |      | <i>P2<sub>1</sub></i> |               |
|-----------------|------|-------------------------------------|------|-----------------------|---------------|
|                 |      | Zn1                                 | Zn2  | Zn1                   | phosphoThr285 |
| E300 (symmetry) | Oε2  | -                                   | 2.12 | -                     | -             |
|                 | Oε1  | -                                   | 2.31 | -                     | -             |
| Wat1            | O    | -                                   | 1.91 | -                     | -             |
| His395          | Nε2  | -                                   | 1.87 | -                     | 3.17          |
| His478          | Nε2  | -                                   | 2.04 | -                     | 2.90          |
| Glu246          | Oε2  | 2.04                                | -    | 1.97                  | -             |
| Asp465          | Oδ1  | 1.99                                | -    | 2.00                  | -             |
| Thr285          | Oγ1  | 2.10                                | -    | 2.36                  | -             |
| His466          | Nε2  | 2.10                                | -    | 2.10                  | -             |

**Supplementary Table S3: Details of Bacterial Strains used in Minimal Inhibitory Concentration (MIC) Experiments**

Supplementary Table 3 is provided as an Excel spreadsheet (Table\_S3.xlsx).

**Supplementary Table S4. Colistin MICs of MCR-1 Mutants in *E. coli* TOP10**

MICs were measured in agar dilution experiments as described in Methods. Data shown are modes for two independent experiments, each performed in duplicate

| Plasmid                  | Colistin MIC (µg/ml) |
|--------------------------|----------------------|
| pUC19                    | ≤0.125               |
| pUC19 <i>mcr-1</i>       | 4                    |
| pUC19 <i>mcr-1</i> E246A | ≤0.125               |
| pUC19 <i>mcr-1</i> T285A | ≤0.125               |
| pUC19 <i>mcr-1</i> K333A | 0.25                 |
| pUC19 <i>mcr-1</i> H395A | ≤0.125               |
| pUC19 <i>mcr-1</i> E468A | 0.25                 |
| pUC19 <i>mcr-1</i> H478A | 0.5                  |

**Supplementary Table S5. Primers used in this study**

| Primer                     | Sequence 5' → 3'                                 |
|----------------------------|--------------------------------------------------|
| MCR-1 <sup>soluble</sup> F | AAGTTCTGTTTCAGGGCCCGACGATCTATCACGCGAAAGATGCTGTAC |
| MCR-1 <sup>soluble</sup> R | ATGGTCTAGAAAGCTTTACCGGATGAAGGCGGTGCGATC          |
| MCR-1 pSU18 F              | TCGGTCATCTCGTCCGTTTG                             |
| MCR-1 pSU18 R              | TTCTCACCCAGACTTTCGCC                             |
| MCR-1 1893 F               | GCTCTAGATTCAGTATGGGATTGCG                        |
| MCR-1 1893 R               | CGGAATTCTCATCTCAGCAAGTAG                         |
| MCR-1 E246A F              | CGTCGTCGGTGCACGGCACGCG                           |
| MCR-1 E246A R              | CGCGTGCCGTCGCACCGACGACG                          |
| MCR-1 T285A F              | CGTGCGGCACATCGGCGGCGTATTCTGTG                    |
| MCR-1 T285A R              | CACAGAATACGCCGCCGATGTGCCGCACG                    |
| MCR-1 K333A F              | GTGGCGTGATAATAATTCGGACTCAGCAGGCGTGATGGAT         |
| MCR-1 K333A R              | ATCCATCACGCCTGCTGAGTCCGAATTATTATCACGCCAC         |
| MCR-1 H395A F              | GCTGCACCAAATGGGCAATGCCGGGCCTGCG                  |
| MCR-1 H395A R              | CGCAGGCCCGGCATTGCCCATTTGGTGCAGC                  |
| MCR-1 E468A F              | GTTCTCACCCAGACTTGCGCCATGATCGCTGAC                |
| MCR-1 E468A R              | GTCAGCGATCATGGCGCAAGTCTGGGTGAGAAC                |
| MCR-1 H478A F              | GGCATTGTCATACCAGCTAGATAGACACCGTTCTCACC           |
| MCR-1 H478A R              | GGTGAGAACGGTGTCTATCTAGCTGGTATGCCAAATGCC          |
| DsbA F                     | AAAAGATTTGGCTGGCGCTG                             |
| DsbA R                     | TGGTATCCATACCCTGCGGA                             |

## **Supplementary Text**

### **Computational Details**

Starting geometries were generated from the two crystal structures reported in this work, by consideration of residues within approximately 5–10 Å of the zinc ion(s), followed by further manual selection to identify and include relevant residue side chains and loops. Residues were truncated at the alpha carbon and saturated with hydrogen atoms; hydrogen atoms were also added manually to satisfy the valencies of all other atoms in the model and, where relevant, different protonation states were also considered computationally. Geometry optimisations were performed using six Cartesian constraints on the alpha carbon atoms of residues for intermediates in which His395 and His478 were included and four where they were not present (see below). We tested a smaller numbers of Cartesian constraints, but found the deviation from the crystallographically-observed geometries too large; further molecular dynamics (MD) studies of the wider protein environment will be needed to define how flexible the active site environment is likely to be.

For both pathways, the crystallographically observed geometry was modified in line with the reaction pathways shown in Schemes S1 and S2 below, simplifying the phosphoethanolamine by replacing substituents with methyl groups to reduce conformational freedom and computational costs, removing substrate 1 to generate Zn\_1 and conversely introducing substrate 2 to generate Zn\_4. Residues Glu246, Thr285, Asp465 and His466 were included in all calculations for both mono- and di-Zn, and His395 and His478 were introduced to complex Zn\_4 for the mono-Zn route, whereas they were present throughout the di-Zn case. For the mono-Zn pathway, the complexes modelled thus comprised of between 78 and 127 atoms, while for the di-Zn pathway, this ranged between 100 and 112 atoms.

All geometry optimisations were performed using Jaguar<sup>5</sup>, with the B3LYP hybrid functional<sup>6-9</sup>, which has been shown to be usefully accurate for modeling reaction mechanisms involving zinc metalloenzymes, and other transition-metal-containing enzymes<sup>10</sup>, using loose convergence criteria (5 times larger than default criteria). Test calculations on other complexes using the more stringent default convergence criteria did not lead to significant changes in energies, bond lengths, or angles, but were much more time-consuming. A relativistic effective core potential was used for the zinc ion(s) as incorporated into Jaguar's LACV3P\* basis set, and the Pople 6-31G\* basis set for all other atoms, with five spherical harmonic components of the polarization functions. Transition states were located in a range of ways, including using small models of phosphate diester dissociation

and stepwise distance scans to generate suitable starting geometries within the active site, as well as using quadratic synchronous transit calculations from suitable intermediates distorted to more closely resemble likely transition states; the mono-Zn TS1 was also used to inform the di-Zn search. Transition states were confirmed by frequency calculations, but, due to the Cartesian constraints used, some included additional low imaginary frequencies. Energies including continuum-dielectric medium (CDM) solvent effects were determined from single point calculations on these geometries, incorporating the Poisson–Boltzmann finite-element model of solvation<sup>11,12</sup> as implemented in Jaguar. The dielectric constant was set to 4, as commonly used in the cluster model approach<sup>13</sup> and the probe radius to 2 Å (labelled as CDM\_protein). We also performed test calculations with solvent parameters corresponding to water ( $\epsilon=80.37$ , probe radius =1.4 Å, labelled as CDM\_water) applied to fragments which could be transported out of the active site and protein environment and fully solvated in an aqueous environment, namely substrate 1 and the [MeO]<sup>-</sup> leaving group. Unless otherwise stated, vibrational frequencies were not computed for stationary points, and so the energetic data do not include a correction for zero-point energy, although we note that this would be expected to be quite small. Dispersion corrections have also not been included to date and are unlikely to affect relative energies significantly<sup>14</sup>; the attractive interactions within the active sites modelled would perhaps also be exaggerated in cluster models such as this, as the “balancing interactions” with the wider protein and solvent environment are not likely to be fully captured by the CDM.

## DFT Calculation Results

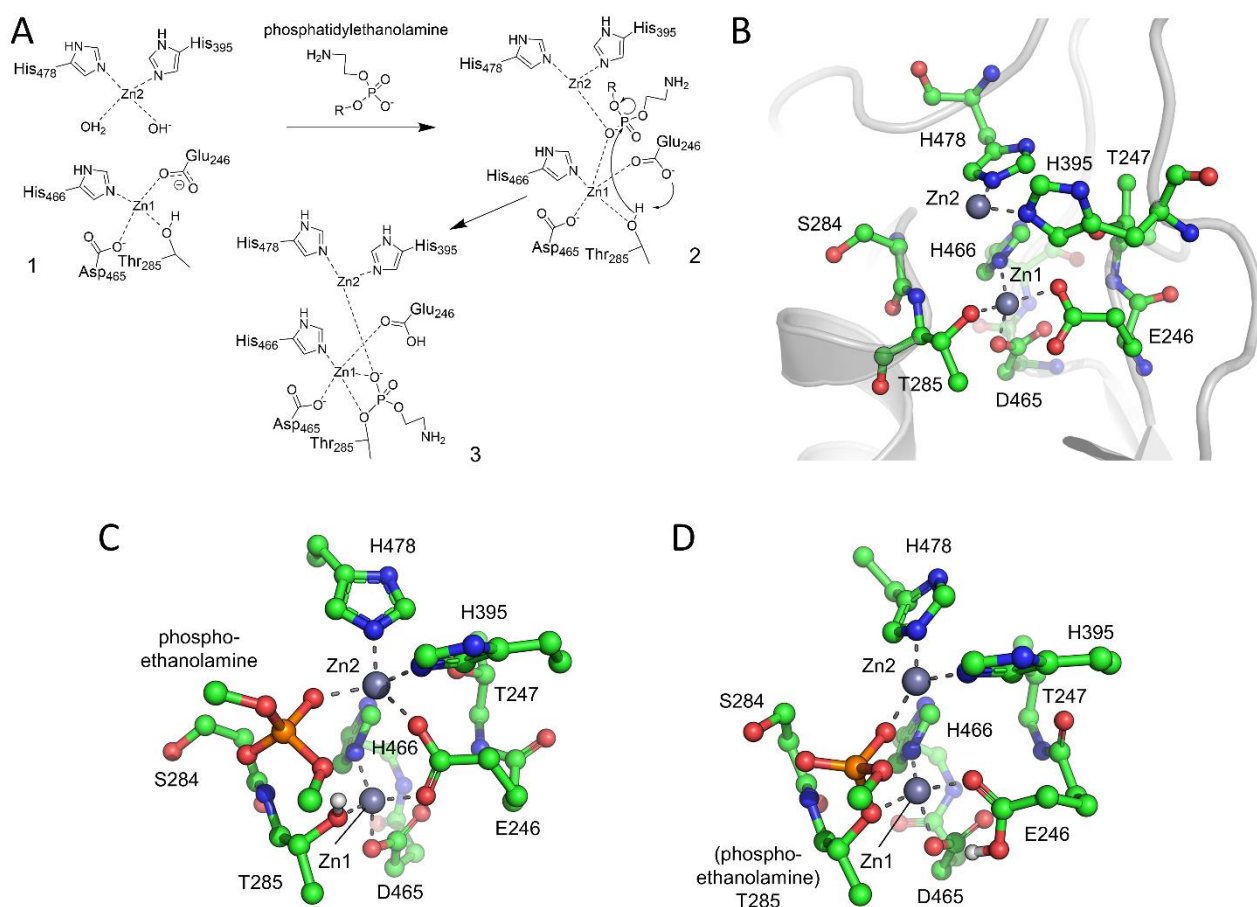

### Supplementary Figure S9: Density Functional Theory (DFT) Modelling of MCR-1 Active Site (Di-Zn(II) form).

A. Possible mechanism for phosphoethanolamine addition (**2**) to MCR-1 Thr285 of di-Zn(II) MCR-1 (**1**) to form Thr285 adduct (**3**). B. MCR-1 di-Zn(II) active site ( $P_4I_2I_2$ ) crystal structure showing residues used in cluster model. Distances in Supplementary Table 2. C. DFT-optimised geometry of phosphoethanolamine non-covalently bound to MCR-1 di-Zn(II) active site (**2** in panel (A) above). Distances in Supplementary Table S9 (2Zn-2). D. DFT-optimised geometry of the MCR-1 di-Zn(II) active site in the phosphoethanolamine-bound form (**3** in panel (A) above). Distances in Supplementary Table S9 (2Zn-3E). A more complete discussion of the structural and computational features of this mechanism is in Supplementary Text below and Supplementary Tables S9 and S10.

Quantum chemical cluster approaches/active site models can provide useful insights into the mechanisms of enzyme-catalysed reactions<sup>10,13</sup>, and were employed here to explore mechanistic postulates for zinc-dependent phospho(ethanolamine)transferases. (For a general



review of computational insights into zinc-dependent metalloenzymes, see references 15,16, and references 17-22 for related work in the field). Application of Cartesian constraints to the model (4 and 6 frozen C $\alpha$  atoms in the case of mono- and di-Zn respectively, see computational details) was necessary to approximate the geometric restriction imposed by active site residues not included in the model<sup>10</sup>. Using a model substrate, [P(O)O(OMe)<sub>2</sub>]<sup>-</sup>, in the place of phosphatidylethanolamine and [P(O)(OMe)OO]<sup>2-</sup> for the phosphorylated lipid, structures (energy minima) corresponding to all intermediates in the two mechanistic postulates (main text **Figure 4A** and **Supplementary Figure S9**) were located. We also ran geometry optimizations with unconstrained and less constrained models, but observed large structural changes when compared to the crystallographically observed reference geometries.

*Comparison of Calculated and Crystallographically-Observed Active Site Geometries*

**Supplementary Table S6a: Structural comparison of Phosphorylated mono-Zn(II) active site geometries (see later discussion of possible protonation states, Scheme S1 for labelling used).**

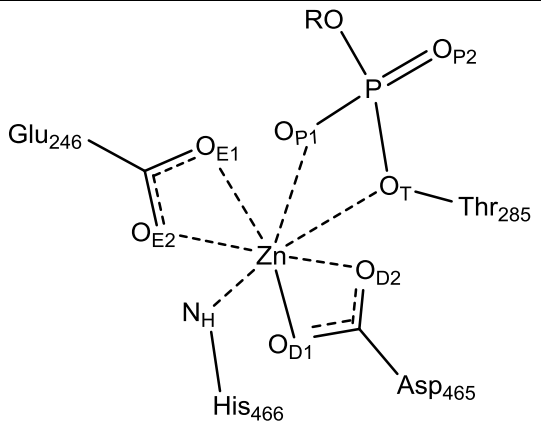

| Species                                                    | O <sub>D1</sub> | O <sub>D2</sub> | O <sub>T</sub> | O <sub>E1</sub> | O <sub>E2</sub> | N <sub>H</sub> | O <sub>P1</sub> | O <sub>P2</sub>          |
|------------------------------------------------------------|-----------------|-----------------|----------------|-----------------|-----------------|----------------|-----------------|--------------------------|
| 1Zn-3D                                                     | 3.698           | 2.395           | 3.456          | 2.128           | 2.139           | 2.110          | 1.958           | 4.503                    |
| 1Zn-3E                                                     | 3.236           | 2.011           | 3.094          | 3.282           | 2.103           | 2.060          | 1.946           | 3.094                    |
| 1Zn-3B                                                     | 3.283           | 2.050           | 3.261          | 2.242           | 2.160           | 2.222          | 1.999           | 4.368                    |
| XRD <sup>a</sup> (1Zn-3, P <sub>2</sub> <sub>1</sub> form) | 3.061           | 1.999           | 2.352          | 2.554           | 1.912           | 2.068          | 2.125           | 3.861/4.003 <sup>b</sup> |

<sup>a</sup> XRD = X-ray diffraction. Data from crystal structure.

<sup>b</sup> The calculations were performed for a methyl phosphate adduct (R=CH<sub>3</sub>), whereas a phosphate group is observed crystallographically.

**Supplementary Table S6b. Structural comparison of Di-Zn(II) active site geometry (see Scheme S2 for details of intermediates).**

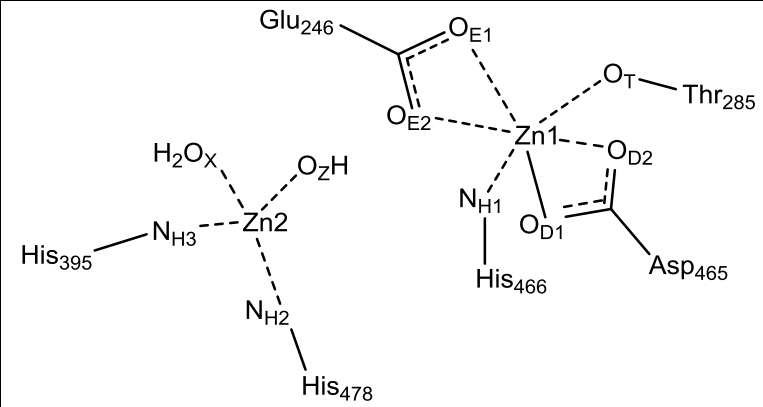

| Species                                       | O <sub>D1</sub> | O <sub>D2</sub> | O <sub>T</sub> | O <sub>E1</sub> -Zn1 | O <sub>E2</sub> -Zn1 | O <sub>E2</sub> -Zn2 | N <sub>H1</sub> | N <sub>H2</sub> | N <sub>H3</sub> | O <sub>Z</sub> | O <sub>X</sub> |
|-----------------------------------------------|-----------------|-----------------|----------------|----------------------|----------------------|----------------------|-----------------|-----------------|-----------------|----------------|----------------|
| 2Zn-1                                         | 2.551           | 2.033           | 2.087          | 2.128                | 2.254                | 4.090                | 2.277           | 2.092           | 2.067           | 1.903          | 2.188          |
| XRD (2Zn-1, P4 <sub>1</sub> 2 <sub>1</sub> 2) | 2.990           | 1.989           | 2.098          | 2.042                | 2.624                | 4.540                | 2.100           | 2.041           | 1.870           | N/A            | 1.906          |

**Supplementary Tables S6a and S6b** show comparisons between calculated geometries and the crystallographically observed active sites reported in this work, i.e. the  $P2_1$  and  $P4_12_12$  structures (**Figures 2C, D**). The DFT-optimized geometries are, overall, in satisfactory agreement with the crystal structures, albeit with some discrepancies, such as the Zn-O<sub>T</sub> distances in the mono-Zn site and the Zn-O<sub>D1</sub> and O<sub>E2</sub>-Zn1/Zn2 distances in the di-Zn case. These differences may respectively reflect differences between the methylphosphate (modelled) and phosphate (observed) adducts, and that these more distant contacts are likely to be weak at best, and simply brought into proximity due to other, stabilizing interactions.

The data shown in **Supplementary Table S6a** also illustrate the effect of choosing different protonation states on the calculated structures, causing substantial variations in the Zn-residue distances. In terms of agreement with the crystal structure, deprotonation of both residues, Glu246 and Asp465, is perhaps most likely.

For both mono- and di-Zn structures, the calculations are thus reasonably consistent with the crystallographically-determined geometries around the active site, supporting the experimentally determined structural assignments and suggesting that residues Glu246 and Asp465 are most likely to be deprotonated.

For the second Zn ion (Zn2) in the di-Zn structure, we have explored the addition of water or hydroxide to fulfill a tetrahedral coordination environment around the metal ion. The calculated estimates of proton affinity are comparatively low (discussed below) and suggest that hydroxide may be present; this is the structure captured in **Supplementary Table S6b**.

### *DFT analysis of the mono-Zn(II) mechanism*

**Figure 4** in the main text shows the residues included in our optimisation of the mono-zinc structure, including the different protonation states explored for 1Zn\_3 (Glu246 vs. Asp465 vs. doubly deprotonated). As discussed above, the doubly deprotonated state appears in best agreement with the crystal structure geometry. An extended version of **Figure 4A** is shown here as **Scheme S1**, highlighting the postulated mechanism for phosphorylation. **Supplementary Table S7** lists the key structural parameters around the Zn coordination site for all intermediates and the transition state found, while **Supplementary Table S8** shows the calculated potential energies for these pathways.

The optimised geometries (**Supplementary Table S7**) maintain a coordination geometry around the single zinc centre consistent with the crystal structure ( $P2_1$  form) throughout the postulated reaction mechanism (**Scheme S1**). This shows that the (small) structural changes required by this reaction are achievable within the constraints of the active site, captured by the Cartesian constraints of the cluster model used here. The intermediates shown in **Scheme S1** thus appear to be feasible from a structural point of view. The data also suggest that the role of the metal centre is, in part, structural, holding the residues and substrate 1 in place throughout. These results therefore indicate that this single zinc reaction mechanism is structurally reasonable.

**Scheme S1: Mechanistic postulate for mono-Zn mechanism. 1Zn-2 to 1Zn-3D and 1Zn-3E proceed via transition states 1Zn-TS1D and 1Zn-TS1E respectively.**

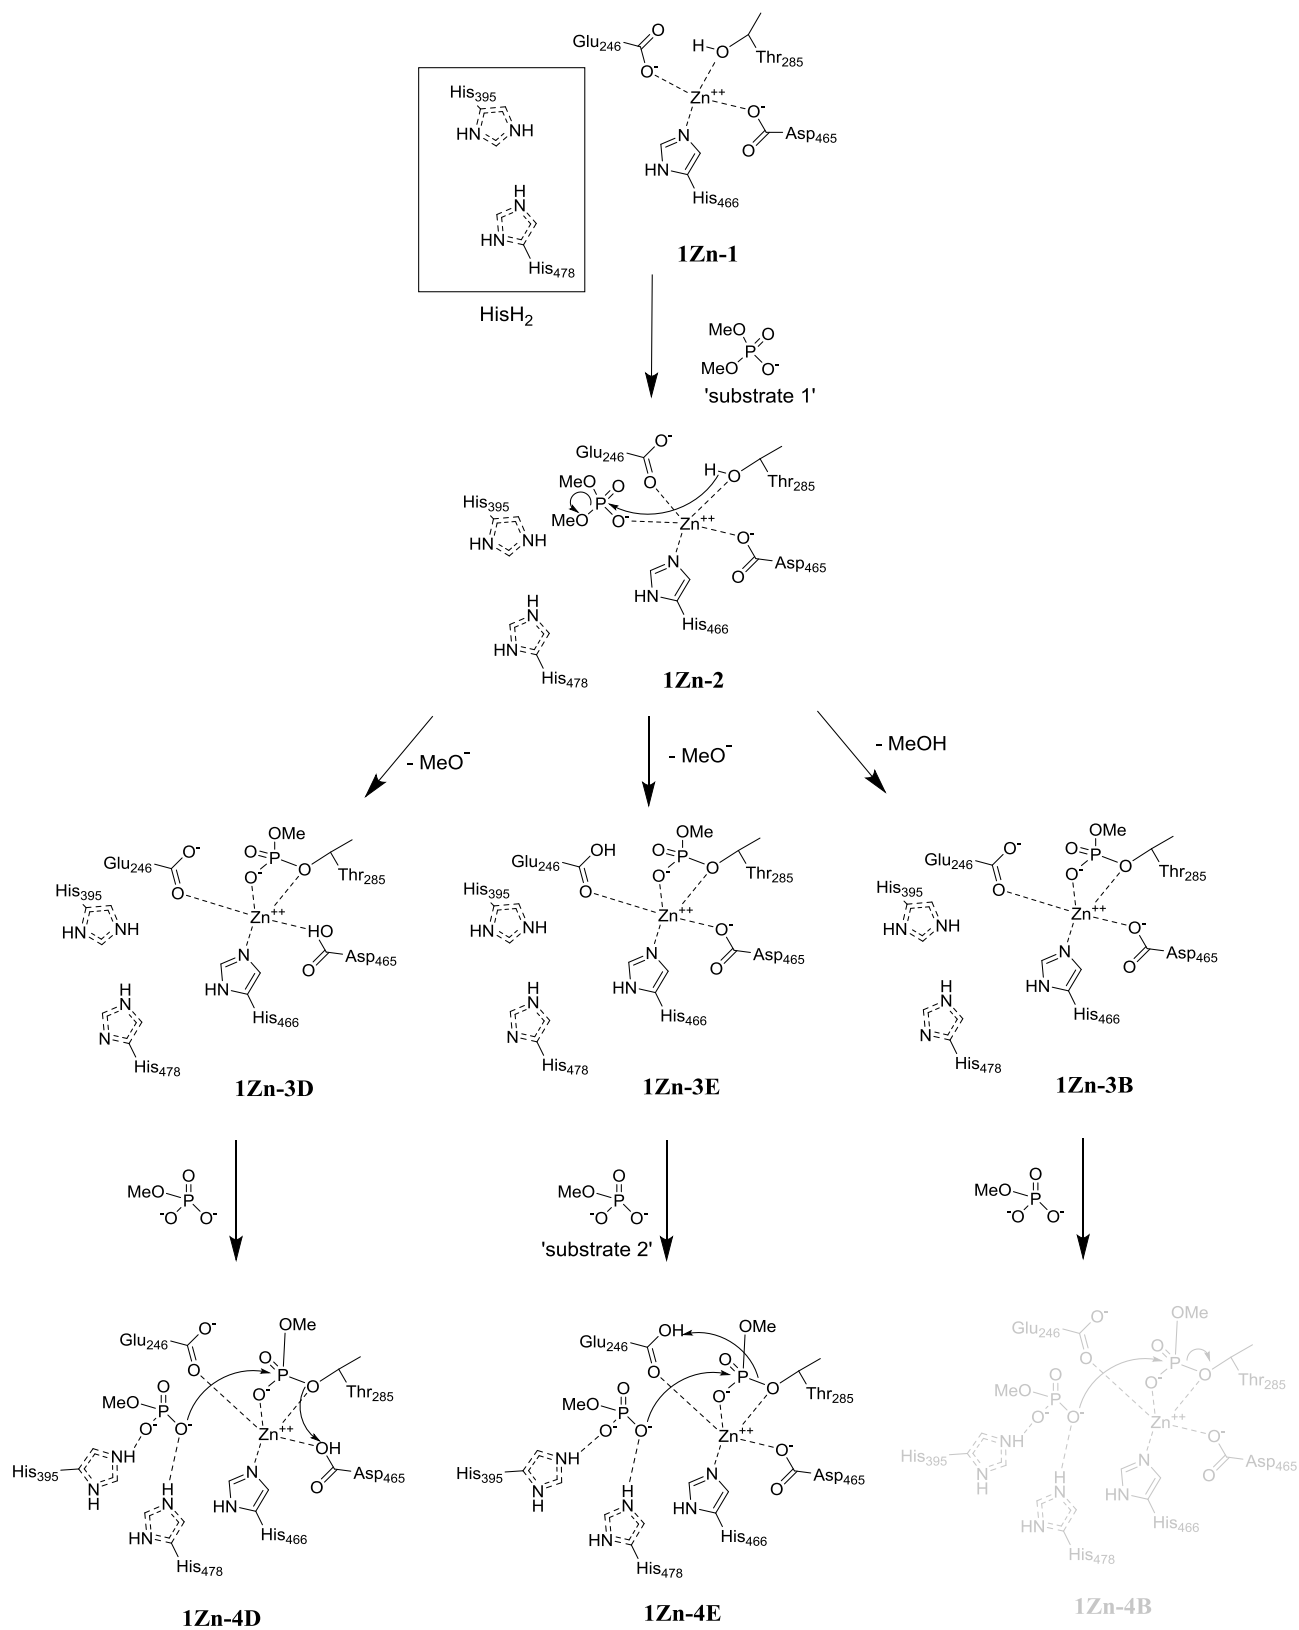

**Supplementary Table S7: Key structural parameters for the mono-Zn mechanism active site (distances given in Å).**

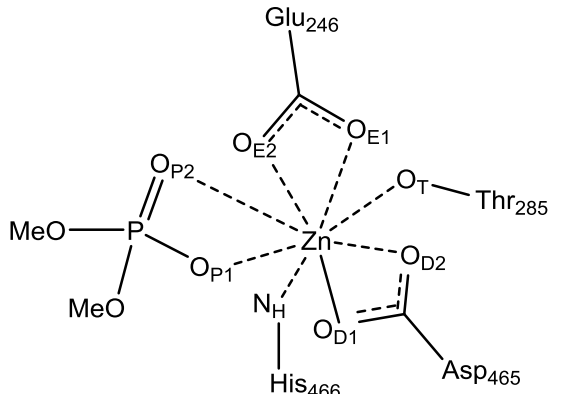

| Species                           | O <sub>D1</sub> | O <sub>D2</sub> | O <sub>T</sub> | O <sub>E1</sub> | O <sub>E2</sub> | N <sub>H</sub> | O <sub>P1</sub> | O <sub>P2</sub>          |
|-----------------------------------|-----------------|-----------------|----------------|-----------------|-----------------|----------------|-----------------|--------------------------|
| 1Zn-1                             | 2.687           | 2.009           | 2.182          | 2.292           | 2.095           | 2.131          | -               | -                        |
| 1Zn-2                             | 3.654           | 2.198           | 2.287          | 2.165           | 2.227           | 2.205          | 2.054           | 3.692                    |
| 1Zn-TS1                           | 4.012           | 2.739           | 3.763          | 2.223           | 2.202           | 2.188          | 1.997           | 2.712                    |
| 1Zn-3D                            | 3.698           | 2.395           | 3.456          | 2.128           | 2.139           | 2.110          | 1.958           | 4.503                    |
| 1Zn-3E                            | 3.236           | 2.011           | 3.094          | 3.282           | 2.103           | 2.060          | 1.946           | 3.094                    |
| 1Zn-3B                            | 3.283           | 2.050           | 3.261          | 2.242           | 2.160           | 2.222          | 1.999           | 4.368                    |
| XRD (1Zn-3, P <sub>21</sub> form) | 3.061           | 1.999           | 2.352          | 2.554           | 1.912           | 2.068          | 2.125           | 3.861/4.003 <sup>a</sup> |
| 1Zn-4D                            | 3.905           | 2.600           | 3.025          | 2.142           | 2.127           | 2.127          | 1.946           | 4.353                    |
| 1Zn-4E                            | 3.303           | 2.057           | 3.052          | 3.252           | 2.133           | 2.072          | 1.925           | 4.226                    |

<sup>a</sup>The calculations were performed for a phosphate diester, whereas a phosphate group is observed crystallographically.

**Supplementary Table S8: Calculated relative potential energies in kcal mol<sup>-1</sup> for mono-Zn mechanism shown in Scheme S1.**

| No. | Species                                                                     | $\Delta E(\text{gp})$ | $\Delta E(\text{sl1})^a$ | $\Delta E(\text{sl2})^b$ |
|-----|-----------------------------------------------------------------------------|-----------------------|--------------------------|--------------------------|
| 1   | 1Zn-1 + substrate 1 + [substrate 2.HisH <sub>2</sub> ]                      | 0.0                   | 0.0                      | 0.0                      |
| 2   | 1Zn-2 + [substrate 2.HisH <sub>2</sub> ]                                    | -57.9                 | -26.1                    | -0.2                     |
| 3   | 1Zn-TS1 + [substrate 2.HisH <sub>2</sub> ]                                  | 10.6                  | 40.4                     | 66.3                     |
| 4   | 1Zn-3D + [substrate 2.HisH <sub>2</sub> ] + [MeO] <sup>-</sup>              | 50.7                  | 42.5                     | 33.1                     |
| 5   | 1Zn-3E + [substrate 2.HisH <sub>2</sub> ] + [MeO] <sup>-</sup>              | 48.2                  | 41.5                     | 32.0                     |
| 6   | 1Zn-3B + [substrate 2.HisH <sub>2</sub> ] + MeOH                            | -49.7                 | -21.6                    | 3.1                      |
| 7   | 1Zn-4D + [substrate 2.HisH <sub>2</sub> ] <sup>c</sup> + [MeO] <sup>-</sup> | 61.2                  | 54.8                     | 45.3                     |
| 8   | 1Zn-4E + [substrate 2.HisH <sub>2</sub> ] <sup>c</sup> + [MeO] <sup>-</sup> | 47.8                  | 44.1                     | 34.7                     |

<sup>a</sup> CDM<sub>protein</sub>

<sup>b</sup> CDM<sub>protein</sub> for fragments inside protein environment and CDM<sub>water</sub> for those external to the active site

<sup>c</sup> Included in cluster model

Repeated attempts to include His395 and His478 in the cluster model for the mono-Zn structure throughout the entire pathway were unsuccessful and optimisations failed to converge. As a consequence, during the **1Zn-TS1** transition state optimization, a structural change was observed in Glu246, which is unlikely to be feasible in the protein environment. More extensive calculations on larger cluster models or indeed QM/MM studies of the protein will be needed to determine if this structural change is necessary for a viable transition state to be located. The geometry of the transition state shows a concerted reaction and is consistent with the transition state for phosphate diester hydrolysis<sup>23</sup>.

The calculated energy differences are shown in **Supplementary Table S8**. This shows that the relative energies are very sensitive to the fragments chosen to balance the reaction ( $[\text{MeO}]^-$  vs. MeOH, [substrate2.HisH<sub>2</sub>], see **Supplementary Table S8**, not present in early steps as discussed above), as well as the protonation state of the Glu246 and Asp465 residues (entries 4,5 vs. 6). Both the aspartate and glutamate residues are geometrically accessible to act as bases for the reactions; calculations performed also suggest that intermediates 1Zn-3D and E are almost isoenergetic. The intermediates generated by proton transfer to Glu246 and Asp465 (**1Zn-3E**, **1Zn-D**) were isoenergetic, within the limitations of the computational approach used. Comparison of **1Zn-3E** to the corresponding phosphorylated crystal structure shows closer agreement than the aspartate-protonated analogue. Optimization of the corresponding deprotonated species (**1Zn-3B**) gave the closest agreement with the crystal structure, as discussed above, and on this basis both Asp465 and Glu246 are postulated to be deprotonated in 1Zn-3. The energetic stabilization of this intermediate, however, is at least in part an artefact of balancing with MeOH, rather than an anionic fragment, as the product, so may be misleading.

Releasing the anionic model product  $[\text{MeO}]^-$  into the gas-phase makes intermediates 1Zn-3 unfavourable (entries 4, 5), with TS1 lower in relative potential energy than the subsequent intermediates. This step remains energetically unfavourable, albeit to a lesser extent, when a low dielectric constant is used in the continuum model of solvation. A water model applied just to the mobile fragments, assuming that they will be transported out of the protein and fully solvated in water, (substrate 1 and  $[\text{MeO}]^-$ , Supplementary Table S8 column E(sl2)) can begin to address such issues.

We have also located intermediates and transition states for this cluster model without any constraints and note that in this scenario TS1 (**1Zn-TS1u**) lies within 45 kcal mol<sup>-1</sup> of 1Zn-2 (**1Zn-2u**) in the gas phase. While still a substantial energy difference, this suggests that the

flexibility of the active site warrants further exploration<sup>24</sup> as the energies of this pathway are quite sensitive to the constraints used. In addition, the transition state (**1Zn-TS1**) lacks the stabilisation conferred by what may be one or two protonated histidine residues and as such, the energy barrier for this process is considerable. Modeling solvent explicitly has been demonstrated to lower the activation energy barrier for phosphate monoester hydrolysis<sup>25,26</sup>, and may be worthy of exploration in future studies.

We note further that the introduction of the two protonated histidines (His395 and His478) is necessary to complete the reaction with substrate 2 (**Scheme S1**) and so complete turnover in this model system. In the intact enzyme this might be achieved by involvement either of other residues or of a second Zn centre (see discussion below).

These results suggest that a more extensive study, using QM/MM and MD simulations, will be necessary to fully test further whether a mono-Zn mechanism is indeed viable; the geometries found in this preliminary study will provide a good starting point for more extensive sampling.

#### *DFT analysis of the Di-Zn(II) mechanism*

The likely reaction pathway postulated in the presence of two zinc ions in the active site is shown as **Scheme S2**, with key structural and energetic features captured in **Supplementary Tables S9 and S10**.

Similar to the mono-Zn case, the gas-phase optimised geometries remain reasonable around both metal centres throughout the postulated reaction pathway (**Supplementary Table S9**), confirming that the mechanistic postulate can be accommodated within the active site observed crystallographically.

However, protonation of the geometrically accessible aspartate oxygen ( $O_{D2}$ ) to generate **2Zn-3D** from **2Zn-2** resulted in a considerable structural change in the position of Asp465. Dissociation from the metal centre was observed, which is likely to be the cause of the approx. 8 kcal mol<sup>-1</sup> drop in relative potential gas-phase energy (**Supplementary Table S10**) when compared to proton transfer to  $O_{E1}$ . A smaller structural change is required to give a geometrically sensible proton transfer intermediate. Consequently, Glu246 is more likely to be the base in the di-Zn mechanism on both energetic and geometric grounds.

**Scheme S2: Mechanistic postulate for di-Zn mechanism. 2Zn-2 to 2Zn-3D and 2Zn-3E proceed via transition states 2Zn-TS1D and 2Zn-TS1E respectively.**

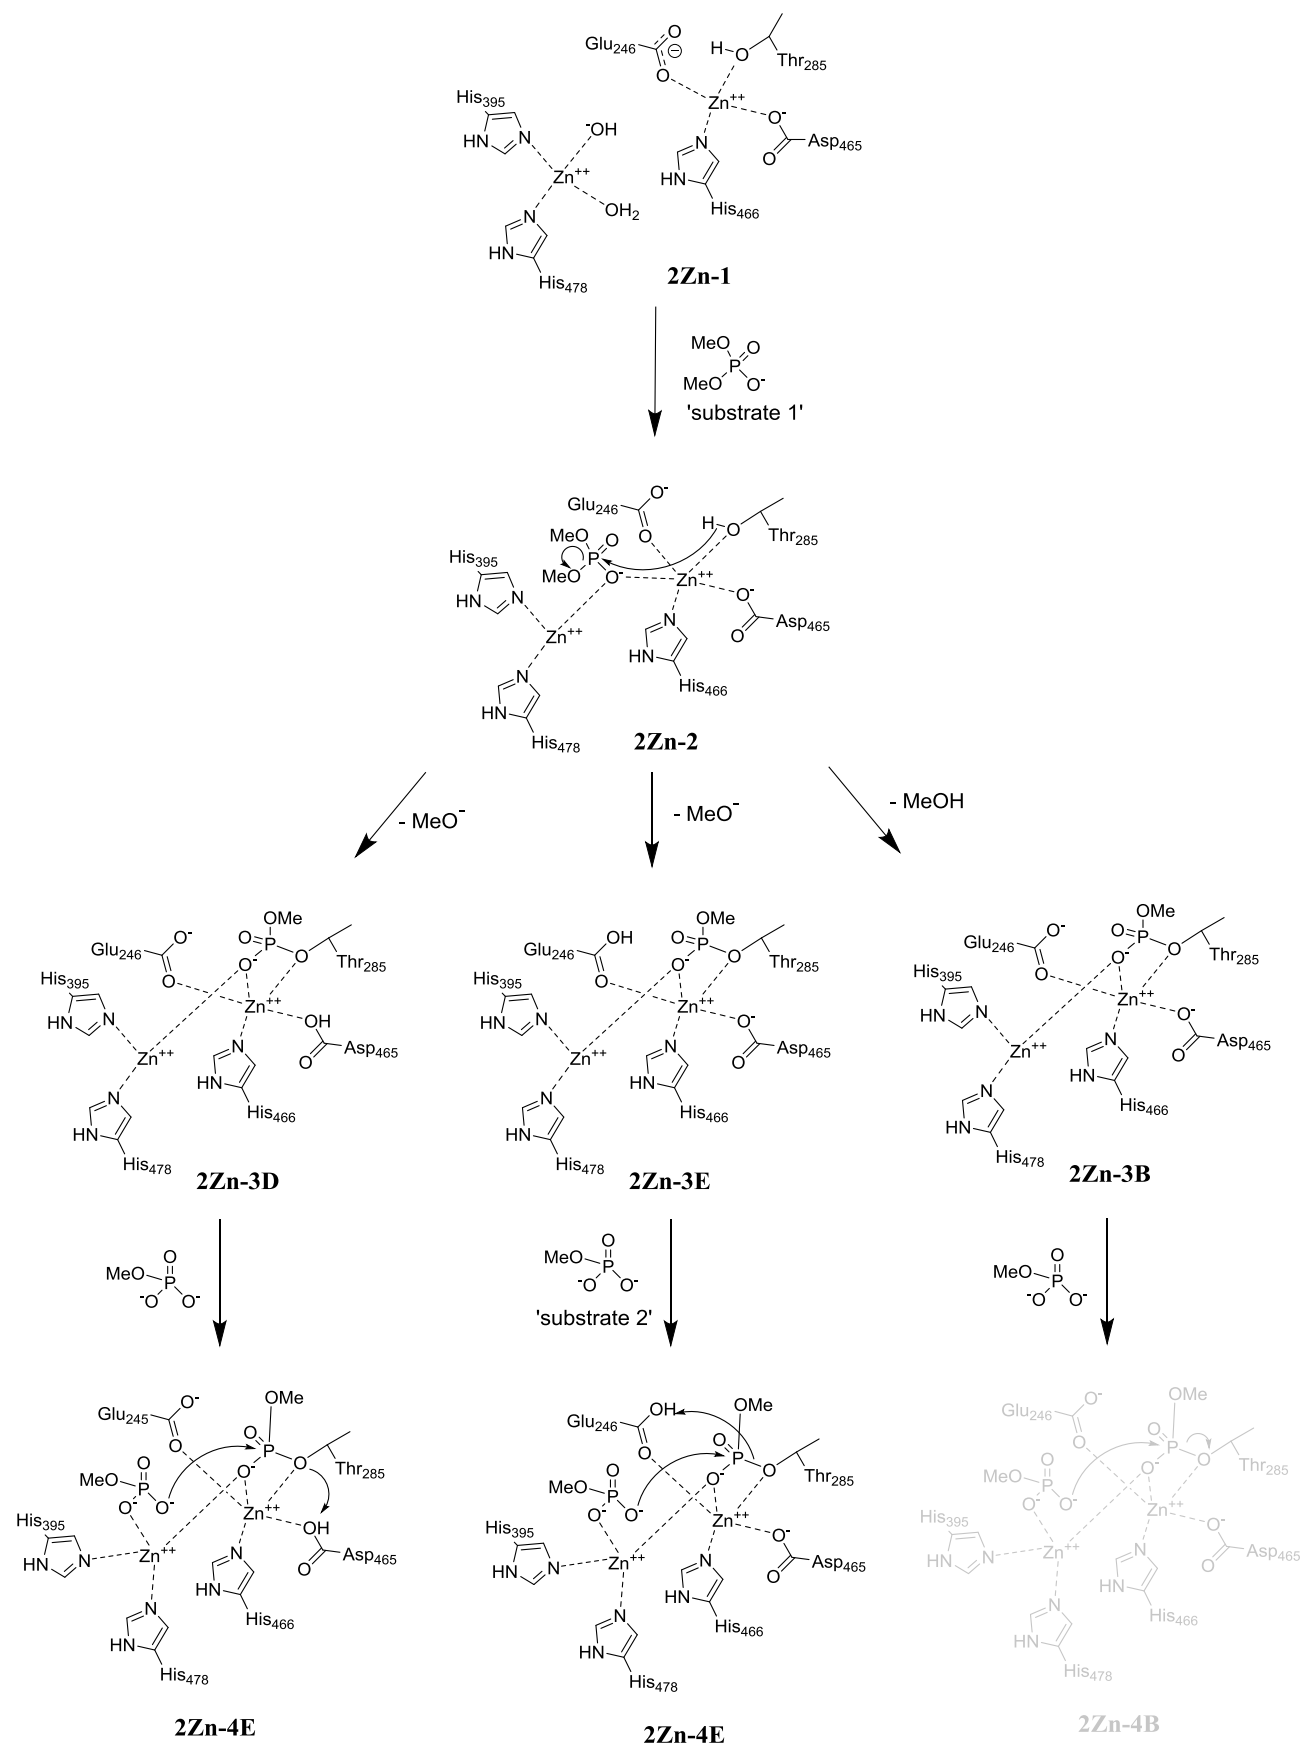



**Supplementary Table S9: Important structural parameters for the di-Zn mechanism active site (distances given in Å, see Scheme S2 for species labelling).**

|                                                                  | <b>O<sub>D1</sub></b> | <b>O<sub>D2</sub></b> | <b>O<sub>T</sub></b> | <b>O<sub>E1</sub>-Zn1</b> | <b>O<sub>E2</sub>-Zn1</b> | <b>O<sub>E2</sub>-Zn2</b> | <b>N<sub>H1</sub></b> | <b>N<sub>H2</sub></b> | <b>N<sub>H3</sub></b> |
|------------------------------------------------------------------|-----------------------|-----------------------|----------------------|---------------------------|---------------------------|---------------------------|-----------------------|-----------------------|-----------------------|
| 2Zn-1                                                            | 2.551                 | 2.033                 | 2.087                | 2.128                     | 2.254                     | 4.09                      | 2.277                 | 2.092                 | 2.067                 |
| <b>XRD (2Zn-1, P<sub>4</sub>1<sub>2</sub>1<sub>2</sub> form)</b> | 2.990                 | 1.989                 | 2.098                | 2.042                     | 2.624                     | 4.540                     | 2.100                 | 2.041                 | 1.870                 |
| 2Zn-2                                                            | 2.723                 | 1.995                 | 2.077                | 2.012                     | 3.153                     | 2.035                     | 2.084                 | 2.095                 | 2.098                 |
| 2Zn-TS1 <sub>E</sub>                                             | 3.361                 | 1.991                 | 2.802                | 2.179                     | 2.351                     | 2.104                     | 2.115                 | 2.097                 | 2.081                 |
| 2Zn-3D                                                           | 3.751                 | 3.777                 | 2.168                | 2.062                     | 2.318                     | 2.077                     | 2.029                 | 2.035                 | 2.015                 |
| 2Zn-3E                                                           | 3.172                 | 2.025                 | 2.162                | 3.204                     | 2.069                     | 3.594                     | 2.042                 | 2.069                 | 2.054                 |
| 2Zn-3B                                                           | 2.964                 | 1.990                 | 2.211                | 2.024                     | 2.751                     | 2.036                     | 2.082                 | 2.090                 | 2.070                 |
| <b>XRD (2Zn-3, PDB 4KAY<sup>3</sup>)</b>                         | 3.143                 | 1.990                 | 1.951                | 2.305                     | 1.795                     | 4.547                     | 1.997                 | 2.465                 | 2.224                 |
| 2Zn-4D                                                           | 5.563                 | 4.661                 | 2.178                | 2.079                     | 2.224                     | 4.406                     | 2.123                 | 2.166                 | 2.167                 |
| 2Zn-4E                                                           | 3.494                 | 2.020                 | 2.343                | 3.348                     | 2.206                     | 4.301                     | 2.102                 | 2.122                 | 2.202                 |

| <b>Species</b>                                                   | <b>O<sub>P1</sub>-Zn1</b> | <b>O<sub>P2</sub>-Zn1</b> | <b>O<sub>P1</sub>-Zn2</b> | <b>O<sub>P2</sub>-Zn2</b> | <b>O<sub>Z</sub></b> | <b>O<sub>X</sub></b> |
|------------------------------------------------------------------|---------------------------|---------------------------|---------------------------|---------------------------|----------------------|----------------------|
| 2Zn-1                                                            | -                         | -                         | -                         | -                         | 1.903                | 2.188                |
| <b>XRD (2Zn-1, P<sub>4</sub>1<sub>2</sub>1<sub>2</sub> form)</b> | -                         | -                         | -                         | -                         | -                    | 1.906                |
| 2Zn-2                                                            | 4.539                     | 4.943                     | 1.938                     | 4.402                     | -                    | -                    |
| 2Zn-TS1 <sub>E</sub>                                             | 2.109                     | 3.882                     | 2.569                     | 2.513                     | -                    | -                    |
| 2Zn-3D                                                           | 2.270                     | 4.064                     | 1.993                     | 4.433                     | -                    | -                    |
| 2Zn-3E                                                           | 2.559                     | 4.229                     | 1.923                     | 3.994                     | -                    | -                    |
| 2Zn-3B                                                           | 3.400                     | 4.376                     | 1.937                     | 4.617                     | -                    | -                    |
| <b>XRD (2Zn-3, PDB 4KAY<sup>3</sup>)</b>                         | 2.780                     | 3.786                     | 1.981                     | 2.486                     |                      |                      |
| 2Zn-4D                                                           | 2.046                     | 3.930                     | 2.324                     | 4.135                     | -                    | -                    |
| 2Zn-4E                                                           | 2.102                     | 3.847                     | 2.213                     | 3.901                     | -                    | -                    |

**Supplementary Table S10: Calculated relative potential energies in kcal mol<sup>-1</sup> for di-Zn mechanism shown in Scheme S2.**

| No. | Species                                                                                                     | $\Delta E(\text{gp})$ | $\Delta E(\text{sl1})^{\text{a}}$ | $\Delta E(\text{sl2})^{\text{b}}$ |
|-----|-------------------------------------------------------------------------------------------------------------|-----------------------|-----------------------------------|-----------------------------------|
| 1   | 2Zn-1 + [Zn(His) <sub>2</sub> (H <sub>2</sub> O)(OH <sup>-</sup> ) <sup>+</sup> + substrate 1 + substrate 2 | 0.0                   | 0.0                               | 0.0                               |
| 2   | 2Zn-2 + H <sub>2</sub> O + [OH] <sup>-</sup> + substrate 2                                                  | 81.9                  | 58.8                              | 43.9                              |
| 3   | 2Zn-TS1 + H <sub>2</sub> O + [OH] <sup>-</sup> + substrate 2                                                | 114.1                 | 93.3                              | 78.5                              |
| 4   | 2Zn-3D + H <sub>2</sub> O + [OH] <sup>-</sup> + [MeO] <sup>-</sup> + substrate 2                            | 310.9                 | 172.7                             | 122.5                             |
| 5   | 2Zn-3E + H <sub>2</sub> O + [OH] <sup>-</sup> + [MeO] <sup>-</sup> + substrate 2                            | 318.2                 | 172.0                             | 121.7                             |
| 6   | 2Zn-3B + H <sub>2</sub> O + [OH] <sup>-</sup> + MeOH + substrate 2                                          | 100.5                 | 75.4                              | 59.4                              |
| 7   | 2Zn-4D + H <sub>2</sub> O + [OH] <sup>-</sup> + [MeO] <sup>-</sup>                                          | -459.4                | 55.5                              | -226.9                            |
| 8   | 2Zn-4E + H <sub>2</sub> O + [OH] <sup>-</sup> + [MeO] <sup>-</sup>                                          | -463.5                | 52.3                              | -230.2                            |

<sup>a</sup> CDM\_protein

<sup>b</sup> CDM\_protein for fragments inside protein and CDM\_water for those external to the system

A transition state similar to that found for the mono-Zn pathway was located for the di-Zn mechanism (**2Zn-TS1E**), indicating the reaction proceeding via attack of O<sub>T</sub> on the phosphate diester facilitated by activation by Glu246. The early transition state shows marked differences from the mono-nuclear equivalent (**1Zn-TS1D**), in O–P and O–H bond lengths, however still falls geometrically within the manifold for phosphate hydrolysis transition states<sup>27</sup>.

The calculated relative potential energies (**Supplementary Table S10**) suffer from the same limitations as discussed for the mono-Zn mechanism above: relative energies vary considerably depending upon the balancing fragments, protonation states and solvation model used. Introducing substrate 1 to the metal cluster is unfavourable as a hydroxide anion is released into the gas phase. Gas-phase proton affinity for the coordinated hydroxide in **2Zn-1** (217 kcal mol<sup>-1</sup>, calculated as the energy difference between **2Zn-1** and **2Zn-1p**, c.f. methyl amine: 214 kcal mol<sup>-1</sup>) indicates that the oxygen atom observed in the crystal structure is likely to be coordinated as hydroxide.

The data shown in **Supplementary Table S10** would appear to rule out the di-Zn mechanism as too high in energy compared to that for 2Zn-1. These energies are nevertheless included here for completeness. We note that these values do not include corrections for entropy, dispersion and indeed quantum tunneling effects, and reiterate the sensitivity of the system to choices of protonation states, balancing fragments and structural constraints. Furthermore, use of model substrates will affect both the steric and electronic requirements of both reaction pathways. Within these limitations, these results indicate that the mono Zinc mechanism may be more likely, indicating that to be the catalytically active form of the enzyme.

While the relative energy differences suggest that the di-Zn pathway may be inaccessible, the “local” energy differences between 2Zn-2 and 2Zn-3 as well as 2Zn-TS1 are smaller than those observed for the corresponding mono-Zn pathway in the  $\Delta E(\text{sl2})$  case. Hence a direct quantitative comparison between the two pathways is not justified, due to the assumptions made and the intrinsic differences in the models. Nevertheless, these structures provide a good starting point for a more extensive exploration of the effects of protein environment using QM/MM and MD calculations, and so will help to define the structural requirements for the PEA transfer reaction.

## Supplementary References

1. Eisenberg, D., Schwarz, E., Komaromy, M. & Wall, R. Analysis of membrane and surface protein sequences with the hydrophobic moment plot. *J Mol Biol* **179**, 125-42 (1984).
2. Baker, N.A., Sept, D., Joseph, S., Holst, M.J. & McCammon, J.A. Electrostatics of nanosystems: application to microtubules and the ribosome. *Proc Natl Acad Sci U S A* **98**, 10037-41 (2001).
3. Wanty, C. et al. The Structure of the Neisserial Lipooligosaccharide Phosphoethanolamine Transferase A (LptA) Required for Resistance to Polymyxin. *Journal of Molecular Biology* **425**, 3389-3402 (2013).
4. Wende, A. et al. Structural and Biochemical Characterization of a Halophilic Archaeal Alkaline Phosphatase. *Journal of Molecular Biology* **400**, 52-62 (2010).
5. Bochevarov, A.D. et al. Jaguar: A high-performance quantum chemistry software program with strengths in life and materials sciences. *International Journal of Quantum Chemistry* **113**, 2110-2142 (2013).
6. Becke, A.D. Density-functional exchange-energy approximation with correct asymptotic behavior. *Physical Review A* **38**, 3098-3100 (1988).
7. Lee, C., Yang, W. & Parr, R.G. Development of the Colle-Salvetti correlation-energy formula into a functional of the electron density. *Physical Review B* **37**, 785-789 (1988).
8. Slater, J.C. *The Self-consistent Field for Molecules and Solids. Vol. 4, Vol. 4*, (McGraw-Hill Book Company, New York, 1974).
9. Vosko, S.H., Wilk, L. & Nusair, M. Accurate spin-dependent electron liquid correlation energies for local spin density calculations: a critical analysis. *Canadian Journal of Physics* **58**, 1200-1211 (1980).
10. Siegbahn, P.E.M. The performance of hybrid DFT for mechanisms involving transition metal complexes in enzymes. *JBIC Journal of Biological Inorganic Chemistry* **11**, 695-701 (2006).
11. Marten, B. et al. New Model for Calculation of Solvation Free Energies: Correction of Self-Consistent Reaction Field Continuum Dielectric Theory for Short-Range Hydrogen-Bonding Effects. *The Journal of Physical Chemistry* **100**, 11775-11788 (1996).
12. Tannor, D.J. et al. Accurate First Principles Calculation of Molecular Charge Distributions and Solvation Energies from Ab Initio Quantum Mechanics and Continuum Dielectric Theory. *Journal of the American Chemical Society* **116**, 11875-11882 (1994).
13. Blomberg, M.R.A., Borowski, T., Himo, F., Liao, R.-Z. & Siegbahn, P.E.M. Quantum Chemical Studies of Mechanisms for Metalloenzymes. *Chemical Reviews* **114**, 3601-3658 (2014).
14. Lonsdale, R., Harvey, J.N. & Mulholland, A.J. Inclusion of Dispersion Effects Significantly Improves Accuracy of Calculated Reaction Barriers for Cytochrome P450 Catalyzed Reactions. *The Journal of Physical Chemistry Letters* **1**, 3232-3237 (2010).
15. Mujika, J.I., Mulholland, A.J. & Harvey, J.N. Computational Methods: Modeling of Reactivity in Zn-Containing Enzymes. in *Encyclopedia of Inorganic Chemistry* (John Wiley & Sons, Ltd, 2006).
16. van der Kamp, M.W. Zinc-Dependent Metalloenzymes – Computational Studies. in *Encyclopedia of Biophysics* (ed. Roberts, G.C.K.) 2795-2796 (Springer Berlin Heidelberg, Berlin, Heidelberg, 2013).

17. Pabis, A., Duarte, F. & Kamerlin, S.C.L. Promiscuity in the Enzymatic Catalysis of Phosphate and Sulfate Transfer. *Biochemistry* **55**, 3061-3081 (2016).
18. Park, H., Brothers, E.N. & Merz, K.M. Hybrid QM/MM and DFT Investigations of the Catalytic Mechanism and Inhibition of the Dinuclear Zinc Metallo- $\beta$ -Lactamase CcrA from *Bacteroides fragilis*. *Journal of the American Chemical Society* **127**, 4232-4241 (2005).
19. Szeto, M.W.Y., Mujika, J.I., Zurek, J., Mulholland, A.J. & Harvey, J.N. QM/MM study on the mechanism of peptide hydrolysis by carboxypeptidase A. *Journal of Molecular Structure: THEOCHEM* **898**, 106-114 (2009).
20. Wu, R., Wang, S., Zhou, N., Cao, Z. & Zhang, Y. A Proton-Shuttle Reaction Mechanism for Histone Deacetylase 8 and the Catalytic Role of Metal Ions. *Journal of the American Chemical Society* **132**, 9471-9479 (2010).
21. Wu, S., Xu, D. & Guo, H. QM/MM Studies of Monozinc  $\beta$ -Lactamase CphA Suggest That the Crystal Structure of an Enzyme-Intermediate Complex Represents a Minor Pathway. *Journal of the American Chemical Society* **132**, 17986-17988 (2010).
22. Xu, D., Guo, H. & Cui, Q. Antibiotic Deactivation by a Dizinc  $\beta$ -Lactamase: Mechanistic Insights from QM/MM and DFT Studies. *Journal of the American Chemical Society* **129**, 10814-10822 (2007).
23. Kirby, A.J. & Nome, F. Fundamentals of Phosphate Transfer. *Accounts of Chemical Research* **48**, 1806-1814 (2015).
24. Roston, D., Demapan, D. & Cui, Q. Leaving Group Ability Observably Affects Transition State Structure in a Single Enzyme Active Site. *Journal of the American Chemical Society* **138**, 7386-7394 (2016).
25. Duarte, F., Åqvist, J., Williams, N.H. & Kamerlin, S.C.L. Resolving Apparent Conflicts between Theoretical and Experimental Models of Phosphate Monoester Hydrolysis. *Journal of the American Chemical Society* **137**, 1081-1093 (2015).
26. Duarte, F., Barrozo, A., Åqvist, J., Williams, N.H. & Kamerlin, S.C.L. The Competing Mechanisms of Phosphate Monoester Dianion Hydrolysis. *Journal of the American Chemical Society* (2016).
27. Chen, S.-L. & Liao, R.-Z. Phosphate Monoester Hydrolysis by Trinuclear Alkaline Phosphatase; DFT Study of Transition States and Reaction Mechanism. *ChemPhysChem* **15**, 2321-2330 (2014).

## Supplementary Data

### Coordinates for all DFT-optimised geometries

#### **1Zn-1**

E B3LYP/6-31G(d): -1991.70489728436

E B3LYP/6-31G(d) in PCM  $\epsilon=4$ : -1991.74381299225

|    |          |           |          |
|----|----------|-----------|----------|
| C  | 15.10180 | -59.13950 | 10.01520 |
| C  | 15.31750 | -57.64970 | 9.68870  |
| C  | 15.06490 | -56.69080 | 10.87580 |
| C  | 15.83720 | -57.11460 | 12.10760 |
| O  | 17.10290 | -57.10430 | 12.11880 |
| O  | 15.19500 | -57.56110 | 13.12720 |
| C  | 13.68620 | -59.42540 | 10.52020 |
| O  | 12.68990 | -59.02340 | 9.91980  |
| N  | 13.61580 | -60.14920 | 11.67280 |
| C  | 12.34300 | -60.43800 | 12.32000 |
| C  | 11.73090 | -59.21000 | 13.02060 |
| O  | 12.64970 | -58.64540 | 13.95430 |
| C  | 10.46740 | -59.57810 | 13.78810 |
| C  | 16.95100 | -57.62600 | 19.06700 |
| C  | 16.74540 | -56.18570 | 19.53340 |
| O  | 17.77120 | -55.87610 | 20.46280 |
| C  | 18.27410 | -57.89000 | 18.35670 |
| O  | 19.04050 | -58.78410 | 18.69030 |
| N  | 18.53950 | -57.07440 | 17.28430 |
| C  | 19.62100 | -57.44000 | 16.38500 |
| C  | 19.59950 | -56.59570 | 15.11580 |
| C  | 20.63210 | -57.06630 | 14.09830 |
| O  | 18.25310 | -56.67690 | 14.55690 |
| H  | 18.23980 | -56.31260 | 13.64900 |
| C  | 16.99670 | -63.49390 | 13.69950 |
| C  | 17.97330 | -62.30570 | 13.61780 |
| C  | 17.32410 | -60.92390 | 13.58080 |
| O  | 18.10040 | -59.92990 | 13.84130 |
| O  | 16.10600 | -60.77870 | 13.31690 |
| C  | 16.33270 | -63.66370 | 15.07150 |
| O  | 16.75110 | -64.45160 | 15.91370 |
| N  | 15.22400 | -62.88310 | 15.27600 |
| C  | 14.50000 | -62.89700 | 16.53300 |
| C  | 15.07890 | -61.95160 | 17.62050 |
| C  | 15.24850 | -60.57070 | 17.08660 |
| N  | 14.19450 | -59.72040 | 16.77080 |
| C  | 14.67470 | -58.67670 | 16.06020 |
| N  | 15.98820 | -58.78690 | 15.91370 |
| C  | 16.35030 | -59.96260 | 16.55310 |
| Zn | 16.91350 | -58.32300 | 14.05130 |
| H  | 15.85300 | -59.49320 | 10.73120 |
| H  | 15.24360 | -59.72020 | 9.09460  |
| H  | 14.63800 | -57.36480 | 8.87900  |

|   |          |           |          |
|---|----------|-----------|----------|
| H | 16.34390 | -57.51400 | 9.33040  |
| H | 13.99870 | -56.66030 | 11.11510 |
| H | 15.38350 | -55.68110 | 10.59120 |
| H | 14.47220 | -60.36400 | 12.17470 |
| H | 12.51730 | -61.23230 | 13.05530 |
| H | 11.64020 | -60.81090 | 11.56640 |
| H | 11.48390 | -58.47310 | 12.24360 |
| H | 10.04500 | -58.69160 | 14.27240 |
| H | 9.70980  | -60.00150 | 13.11950 |
| H | 10.69160 | -60.31910 | 14.56670 |
| H | 16.92020 | -58.29420 | 19.93160 |
| H | 16.12770 | -57.89720 | 18.39690 |
| H | 15.74610 | -56.09980 | 19.99180 |
| H | 16.76450 | -55.49680 | 18.67210 |
| H | 17.75920 | -56.58580 | 16.86430 |
| H | 19.55850 | -58.50470 | 16.11880 |
| H | 20.58350 | -57.29870 | 16.88940 |
| H | 19.76510 | -55.54120 | 15.37350 |
| H | 20.60580 | -56.44490 | 13.19530 |
| H | 21.64140 | -56.99770 | 14.51940 |
| H | 20.43990 | -58.10530 | 13.81090 |
| H | 17.54950 | -64.41910 | 13.51600 |
| H | 16.23410 | -63.38600 | 12.92060 |
| H | 18.57450 | -62.39320 | 12.70240 |
| H | 18.68900 | -62.32590 | 14.44690 |
| H | 15.07090 | -62.12910 | 14.61250 |
| H | 14.51810 | -63.92090 | 16.91540 |
| H | 13.45570 | -62.63170 | 16.32630 |
| H | 16.05780 | -62.33110 | 17.92790 |
| H | 14.42530 | -61.97750 | 18.50300 |
| H | 14.04530 | -57.90490 | 15.64740 |
| H | 17.37590 | -60.29700 | 16.58230 |
| H | 13.42190 | -58.30380 | 13.45970 |
| H | 17.66990 | -54.94950 | 20.72960 |
| H | 13.21150 | -59.88690 | 16.93650 |

### 1Zn-2

E B3LYP/6-31G(d): -2713.98457163202

E B3LYP/6-31G(d) in PCM  $\epsilon=4$ : -2714.05784663468

|   |          |           |          |
|---|----------|-----------|----------|
| C | 14.80280 | -58.66870 | 10.00690 |
| C | 14.66590 | -57.14440 | 9.81880  |
| C | 14.13730 | -56.41020 | 11.06860 |
| C | 14.96580 | -56.72010 | 12.30480 |
| O | 16.20180 | -56.43720 | 12.31710 |
| O | 14.43090 | -57.29550 | 13.30770 |
| C | 13.47730 | -59.28830 | 10.44820 |
| O | 12.46000 | -59.19210 | 9.75390  |
| N | 13.50260 | -59.90370 | 11.65550 |
| C | 12.30310 | -60.44230 | 12.26540 |

|    |          |           |          |
|----|----------|-----------|----------|
| C  | 11.45620 | -59.37550 | 12.98860 |
| O  | 12.16260 | -58.78800 | 14.06800 |
| C  | 10.17890 | -59.98330 | 13.56170 |
| C  | 16.95100 | -57.62600 | 19.06700 |
| C  | 17.14900 | -57.40660 | 20.57610 |
| O  | 17.75460 | -58.51660 | 21.21030 |
| C  | 18.28010 | -57.81730 | 18.36400 |
| O  | 19.20840 | -58.46660 | 18.87900 |
| N  | 18.40460 | -57.24820 | 17.14670 |
| C  | 19.62100 | -57.44000 | 16.38500 |
| C  | 19.61080 | -56.67510 | 15.06170 |
| C  | 20.98870 | -56.68180 | 14.39790 |
| O  | 18.63140 | -57.19210 | 14.15860 |
| P  | 15.41340 | -54.84200 | 16.06750 |
| O  | 14.04100 | -55.38270 | 16.25640 |
| O  | 16.54620 | -55.74520 | 15.52500 |
| O  | 15.93130 | -54.26530 | 17.51970 |
| C  | 17.33260 | -63.02380 | 13.97220 |
| C  | 17.90750 | -61.59670 | 13.86500 |
| C  | 16.88310 | -60.48540 | 13.55160 |
| O  | 17.33510 | -59.28990 | 13.63570 |
| O  | 15.72130 | -60.81070 | 13.22790 |
| C  | 16.57650 | -63.31240 | 15.27590 |
| O  | 17.08200 | -63.94860 | 16.20050 |
| N  | 15.29840 | -62.83020 | 15.31960 |
| C  | 14.50000 | -62.89700 | 16.53300 |
| C  | 14.89320 | -61.83760 | 17.60200 |
| C  | 14.95760 | -60.44570 | 17.05970 |
| N  | 13.88060 | -59.57520 | 16.93140 |
| C  | 14.28910 | -58.47030 | 16.25980 |
| N  | 15.56920 | -58.57770 | 15.94260 |
| C  | 15.99130 | -59.79110 | 16.44400 |
| Zn | 16.40380 | -57.40410 | 14.26660 |
| H  | 15.60130 | -58.89160 | 10.72380 |
| H  | 15.08350 | -59.12090 | 9.04710  |
| H  | 13.97530 | -56.95340 | 8.98920  |
| H  | 15.64470 | -56.73280 | 9.54740  |
| H  | 13.09500 | -56.68120 | 11.25720 |
| H  | 14.17700 | -55.32780 | 10.89200 |
| H  | 14.36690 | -59.96730 | 12.19590 |
| H  | 12.60870 | -61.20620 | 12.99000 |
| H  | 11.69620 | -60.91820 | 11.48530 |
| H  | 11.18410 | -58.61240 | 12.24180 |
| H  | 9.59270  | -59.21200 | 14.07250 |
| H  | 9.56140  | -60.42910 | 12.77320 |
| H  | 10.42330 | -60.76340 | 14.29470 |
| H  | 16.36370 | -58.54070 | 18.91860 |
| H  | 16.38830 | -56.79430 | 18.63000 |
| H  | 16.17350 | -57.25090 | 21.05180 |
| H  | 17.73530 | -56.48230 | 20.73350 |
| H  | 17.62950 | -56.72670 | 16.72080 |



|   |          |           |          |
|---|----------|-----------|----------|
| H | 19.78340 | -58.51110 | 16.18730 |
| H | 20.48000 | -57.11750 | 16.98910 |
| H | 19.29120 | -55.64400 | 15.23980 |
| H | 20.93450 | -56.17820 | 13.42810 |
| H | 21.73120 | -56.16850 | 15.02020 |
| H | 21.33830 | -57.70930 | 14.23180 |
| H | 18.15270 | -63.74730 | 13.93810 |
| H | 16.67470 | -63.19780 | 13.11390 |
| H | 18.65160 | -61.57340 | 13.05650 |
| H | 18.45500 | -61.32680 | 14.77650 |
| H | 15.06080 | -62.14620 | 14.60150 |
| H | 14.62130 | -63.89390 | 16.96700 |
| H | 13.44970 | -62.77130 | 16.24590 |
| H | 15.88330 | -62.10660 | 17.98310 |
| H | 14.19420 | -61.90860 | 18.44730 |
| H | 13.67160 | -57.60650 | 16.05640 |
| H | 17.01270 | -60.12220 | 16.33740 |
| H | 12.90600 | -58.25350 | 13.71150 |
| H | 18.50260 | -58.74750 | 20.62000 |
| H | 18.75550 | -58.14840 | 13.97500 |
| O | 15.41430 | -53.48630 | 15.14730 |
| C | 17.15660 | -53.55070 | 17.60020 |
| H | 17.30180 | -53.27720 | 18.65030 |
| H | 18.00540 | -54.16370 | 17.27320 |
| H | 17.11950 | -52.63400 | 16.99730 |
| H | 12.92740 | -59.74700 | 17.21550 |
| C | 16.30820 | -53.34280 | 14.04190 |
| H | 16.02540 | -52.41320 | 13.53690 |
| H | 17.35100 | -53.26150 | 14.37500 |
| H | 16.23420 | -54.17940 | 13.34170 |

### 1Zn-3D

E B3LYP/6-31G(d): -2598.74245967702

E B3LYP/6-31G(d) in PCM  $\epsilon=4$ : -2598.78172349237

|   |          |           |          |
|---|----------|-----------|----------|
| C | 14.42300 | -58.27930 | 9.94990  |
| C | 13.94330 | -56.81710 | 9.77820  |
| C | 13.07740 | -56.27930 | 10.93280 |
| C | 13.66150 | -56.47960 | 12.31810 |
| O | 14.91370 | -56.52570 | 12.49450 |
| O | 12.87580 | -56.62260 | 13.32410 |
| C | 13.28420 | -59.18810 | 10.40220 |
| O | 12.35390 | -59.49530 | 9.66130  |
| N | 13.33080 | -59.54690 | 11.72560 |
| C | 12.34300 | -60.43800 | 12.32000 |
| C | 10.93170 | -59.82080 | 12.41400 |
| O | 10.87550 | -58.68150 | 13.27310 |
| C | 9.93190  | -60.83270 | 12.96460 |
| C | 16.95100 | -57.62600 | 19.06700 |
| C | 16.76340 | -58.68080 | 20.17690 |

|    |          |           |          |
|----|----------|-----------|----------|
| O  | 16.28590 | -59.91870 | 19.68670 |
| C  | 17.93170 | -58.09490 | 18.01430 |
| O  | 17.92420 | -59.27260 | 17.60430 |
| N  | 18.79970 | -57.17140 | 17.54920 |
| C  | 19.62100 | -57.44000 | 16.38500 |
| C  | 19.39050 | -56.41330 | 15.26980 |
| C  | 20.14760 | -56.74630 | 13.99180 |
| O  | 17.97150 | -56.38710 | 14.97270 |
| C  | 17.69530 | -61.97710 | 14.64040 |
| C  | 17.78480 | -60.43960 | 14.58830 |
| C  | 16.54730 | -59.77080 | 14.02450 |
| O  | 16.45640 | -58.42820 | 14.14500 |
| O  | 15.63560 | -60.35970 | 13.47260 |
| C  | 16.81700 | -62.48640 | 15.79390 |
| O  | 17.28820 | -62.82640 | 16.87270 |
| N  | 15.47760 | -62.53570 | 15.52100 |
| C  | 14.50000 | -62.89700 | 16.53300 |
| C  | 14.18320 | -61.76720 | 17.55760 |
| C  | 13.81220 | -60.47450 | 16.90720 |
| N  | 12.56770 | -60.20590 | 16.35190 |
| C  | 12.61790 | -59.02360 | 15.69560 |
| N  | 13.83840 | -58.51080 | 15.78780 |
| C  | 14.58030 | -59.39720 | 16.55530 |
| Zn | 14.59310 | -56.97900 | 14.54830 |
| H  | 15.25260 | -58.30580 | 10.66210 |
| H  | 14.78610 | -58.64920 | 8.98500  |
| H  | 13.34920 | -56.74400 | 8.86050  |
| H  | 14.82570 | -56.18110 | 9.65050  |
| H  | 12.08210 | -56.73480 | 10.91690 |
| H  | 12.91840 | -55.20020 | 10.79960 |
| H  | 14.22150 | -59.49470 | 12.20800 |
| H  | 12.70200 | -60.69960 | 13.31970 |
| H  | 12.26980 | -61.36190 | 11.72820 |
| H  | 10.63060 | -59.53560 | 11.39920 |
| H  | 8.94500  | -60.36960 | 13.05970 |
| H  | 9.84680  | -61.70180 | 12.30360 |
| H  | 10.23700 | -61.18490 | 13.95960 |
| H  | 15.98720 | -57.45670 | 18.56870 |
| H  | 17.26290 | -56.66790 | 19.49710 |
| H  | 16.02520 | -58.31360 | 20.89770 |
| H  | 17.71570 | -58.80790 | 20.71960 |
| H  | 18.57430 | -56.18930 | 17.72750 |
| H  | 19.39710 | -58.45030 | 16.03920 |
| H  | 20.68610 | -57.42210 | 16.65700 |
| H  | 19.68040 | -55.42010 | 15.62550 |
| H  | 19.94230 | -55.99240 | 13.22680 |
| H  | 21.22690 | -56.76930 | 14.17970 |
| H  | 19.85020 | -57.72570 | 13.59760 |
| H  | 18.69630 | -62.37450 | 14.82440 |
| H  | 17.34060 | -62.36220 | 13.67830 |
| H  | 18.62780 | -60.14020 | 13.94760 |

|   |          |           |          |
|---|----------|-----------|----------|
| H | 17.98490 | -60.03980 | 15.59010 |
| H | 15.16200 | -62.09000 | 14.66830 |
| H | 14.88260 | -63.76020 | 17.08470 |
| H | 13.58610 | -63.20590 | 16.01310 |
| H | 15.06000 | -61.59560 | 18.18580 |
| H | 13.38380 | -62.11820 | 18.22460 |
| H | 11.79290 | -58.63640 | 15.11130 |
| H | 15.61470 | -59.22180 | 16.80660 |
| H | 11.52830 | -58.00550 | 12.99840 |
| H | 16.90120 | -60.16170 | 18.96680 |
| H | 11.74100 | -60.78160 | 16.43410 |
| P | 17.05060 | -55.16360 | 15.63030 |
| O | 17.18000 | -54.08710 | 14.42610 |
| O | 15.63550 | -55.75090 | 15.66100 |
| O | 17.65220 | -54.66300 | 16.90480 |
| H | 17.23340 | -57.92510 | 14.50640 |
| C | 16.74530 | -52.74040 | 14.67270 |
| H | 17.04260 | -52.15500 | 13.80040 |
| H | 15.65550 | -52.70060 | 14.78130 |
| H | 17.22140 | -52.34000 | 15.57280 |

### 1Zn-3E

E B3LYP/6-31G(d): -2598.74641580124

E B3LYP/6-31G(d) in PCM  $\epsilon=4$ : -2598.78342224583

|   |          |           |          |
|---|----------|-----------|----------|
| C | 15.57220 | -59.62580 | 10.43670 |
| C | 15.87420 | -58.25700 | 9.80110  |
| C | 15.34130 | -57.04300 | 10.60100 |
| C | 15.80050 | -57.00380 | 12.03660 |
| O | 17.10310 | -56.85870 | 12.18430 |
| O | 14.99950 | -57.10460 | 12.98160 |
| C | 14.07280 | -59.84950 | 10.65400 |
| O | 13.26320 | -59.75060 | 9.73260  |
| N | 13.71840 | -60.14070 | 11.93700 |
| C | 12.34300 | -60.43800 | 12.32000 |
| C | 11.44650 | -59.18480 | 12.30720 |
| O | 12.00010 | -58.14850 | 13.12540 |
| C | 10.04750 | -59.47970 | 12.83050 |
| C | 16.95100 | -57.62600 | 19.06700 |
| C | 16.74970 | -58.59630 | 20.24680 |
| O | 16.39250 | -59.90280 | 19.83110 |
| C | 18.02180 | -58.10900 | 18.10690 |
| O | 18.17940 | -59.32180 | 17.86870 |
| N | 18.75500 | -57.14900 | 17.51330 |
| C | 19.62100 | -57.44000 | 16.38500 |
| C | 19.63040 | -56.28940 | 15.35910 |
| C | 20.49030 | -56.62500 | 14.14830 |
| O | 18.28480 | -56.01580 | 14.86850 |
| C | 17.81210 | -62.29690 | 14.74050 |
| C | 18.06360 | -60.77990 | 14.83310 |

|    |          |           |          |
|----|----------|-----------|----------|
| C  | 16.90540 | -59.87590 | 14.40250 |
| O  | 17.04620 | -58.62900 | 14.70640 |
| O  | 15.91760 | -60.34390 | 13.79610 |
| C  | 16.86610 | -62.83930 | 15.81960 |
| O  | 17.25000 | -63.52560 | 16.75990 |
| N  | 15.55280 | -62.50050 | 15.62990 |
| C  | 14.50000 | -62.89700 | 16.53300 |
| C  | 14.17390 | -61.88410 | 17.66960 |
| C  | 13.91960 | -60.52070 | 17.12600 |
| N  | 12.73390 | -60.08660 | 16.54280 |
| C  | 12.94460 | -58.88890 | 15.94820 |
| N  | 14.21160 | -58.52840 | 16.11310 |
| C  | 14.81770 | -59.53140 | 16.85250 |
| Zn | 15.50660 | -57.37070 | 15.00540 |
| H  | 16.12580 | -59.75710 | 11.37240 |
| H  | 15.91800 | -60.40670 | 9.74820  |
| H  | 15.40630 | -58.21430 | 8.81240  |
| H  | 16.95590 | -58.15500 | 9.66220  |
| H  | 14.24880 | -57.04230 | 10.60500 |
| H  | 15.68110 | -56.11930 | 10.11690 |
| H  | 14.45100 | -60.19440 | 12.64350 |
| H  | 12.36870 | -60.86510 | 13.32880 |
| H  | 11.92430 | -61.18550 | 11.63500 |
| H  | 11.38230 | -58.83530 | 11.26850 |
| H  | 9.44140  | -58.56840 | 12.82860 |
| H  | 9.54850  | -60.22850 | 12.20580 |
| H  | 10.08530 | -59.86070 | 13.85970 |
| H  | 16.00860 | -57.54530 | 18.50970 |
| H  | 17.18370 | -56.61940 | 19.43420 |
| H  | 15.93850 | -58.22690 | 20.88350 |
| H  | 17.66540 | -58.61270 | 20.86200 |
| H  | 18.51200 | -56.16830 | 17.67630 |
| H  | 19.27230 | -58.35720 | 15.91100 |
| H  | 20.65710 | -57.59710 | 16.71770 |
| H  | 19.99730 | -55.37710 | 15.84110 |
| H  | 20.49230 | -55.79090 | 13.44020 |
| H  | 21.52370 | -56.82260 | 14.45400 |
| H  | 20.10670 | -57.51570 | 13.63770 |
| H  | 18.75970 | -62.82460 | 14.87540 |
| H  | 17.41870 | -62.54270 | 13.74700 |
| H  | 18.91750 | -60.51770 | 14.19170 |
| H  | 18.34880 | -60.49150 | 15.85050 |
| H  | 15.35410 | -61.86000 | 14.86780 |
| H  | 14.79830 | -63.84270 | 16.99480 |
| H  | 13.59280 | -63.08230 | 15.94310 |
| H  | 15.02040 | -61.82070 | 18.35980 |
| H  | 13.31710 | -62.26140 | 18.24390 |
| H  | 12.20900 | -58.36450 | 15.35610 |
| H  | 15.86200 | -59.50230 | 17.11980 |
| H  | 12.90470 | -57.97090 | 12.81100 |
| H  | 17.08460 | -60.15100 | 19.18450 |

|   |          |           |          |
|---|----------|-----------|----------|
| H | 11.84530 | -60.56700 | 16.57690 |
| P | 17.33150 | -54.91980 | 15.63920 |
| O | 17.37480 | -53.71890 | 14.54920 |
| O | 15.92730 | -55.56130 | 15.58490 |
| O | 17.88490 | -54.50870 | 16.96770 |
| H | 17.40210 | -56.84760 | 13.12670 |
| C | 16.83510 | -52.44400 | 14.92950 |
| H | 17.09760 | -51.74510 | 14.13250 |
| H | 15.74420 | -52.49850 | 15.02160 |
| H | 17.26930 | -52.10900 | 15.87620 |

### 1Zn-3B

E B3LYP/6-31G(d): -2598.25940723173

E B3LYP/6-31G(d) in PCM  $\epsilon=4$ : -2598.33141578330

|   |          |           |          |
|---|----------|-----------|----------|
| C | 15.16530 | -58.96640 | 10.23020 |
| C | 15.00500 | -57.48470 | 9.82290  |
| C | 14.20350 | -56.63370 | 10.82830 |
| C | 14.74990 | -56.72840 | 12.24720 |
| O | 15.97590 | -56.57010 | 12.46270 |
| O | 13.94540 | -57.01060 | 13.21130 |
| C | 13.81250 | -59.60470 | 10.53600 |
| O | 12.95250 | -59.76170 | 9.66380  |
| N | 13.61140 | -59.91470 | 11.84390 |
| C | 12.34300 | -60.43800 | 12.32000 |
| C | 11.21430 | -59.38650 | 12.32410 |
| O | 11.47360 | -58.30400 | 13.20820 |
| C | 9.88950  | -60.00660 | 12.75870 |
| C | 16.95100 | -57.62600 | 19.06700 |
| C | 16.79130 | -58.53520 | 20.29790 |
| O | 16.49540 | -59.87760 | 19.95710 |
| C | 18.04440 | -58.12460 | 18.13410 |
| O | 18.21510 | -59.34330 | 17.92530 |
| N | 18.77880 | -57.17010 | 17.54230 |
| C | 19.62100 | -57.44000 | 16.38500 |
| C | 19.77750 | -56.16500 | 15.53940 |
| C | 20.72750 | -56.38440 | 14.36720 |
| O | 18.51070 | -55.77740 | 14.97740 |
| C | 17.67350 | -62.36020 | 14.48760 |
| C | 17.95640 | -60.85430 | 14.66450 |
| C | 16.82640 | -59.89480 | 14.24950 |
| O | 17.03330 | -58.67150 | 14.55070 |
| O | 15.81060 | -60.34660 | 13.66390 |
| C | 16.77680 | -62.96990 | 15.57180 |
| O | 17.19380 | -63.77590 | 16.40140 |
| N | 15.47520 | -62.55220 | 15.52070 |
| C | 14.50000 | -62.89700 | 16.53300 |
| C | 14.28030 | -61.78690 | 17.60410 |
| C | 14.06750 | -60.43520 | 17.00290 |
| N | 12.89390 | -60.00110 | 16.39740 |

|    |          |           |          |
|----|----------|-----------|----------|
| C  | 13.13390 | -58.80850 | 15.78960 |
| N  | 14.39460 | -58.45090 | 15.96460 |
| C  | 14.97520 | -59.45010 | 16.72430 |
| Zn | 15.60440 | -57.20160 | 14.58110 |
| H  | 15.83880 | -59.04610 | 11.08960 |
| H  | 15.61710 | -59.51570 | 9.39540  |
| H  | 14.49760 | -57.43750 | 8.85190  |
| H  | 16.00340 | -57.04970 | 9.70340  |
| H  | 13.14920 | -56.92580 | 10.82840 |
| H  | 14.24990 | -55.58090 | 10.51930 |
| H  | 14.38970 | -59.86270 | 12.50410 |
| H  | 12.49980 | -60.81090 | 13.33820 |
| H  | 12.03230 | -61.27950 | 11.68550 |
| H  | 11.11430 | -59.01890 | 11.29290 |
| H  | 9.10560  | -59.24220 | 12.77690 |
| H  | 9.58310  | -60.80600 | 12.07440 |
| H  | 9.97220  | -60.42700 | 13.77010 |
| H  | 16.01290 | -57.61940 | 18.49870 |
| H  | 17.14190 | -56.59090 | 19.37270 |
| H  | 15.96590 | -58.16750 | 20.91970 |
| H  | 17.70950 | -58.47520 | 20.91110 |
| H  | 18.50070 | -56.19030 | 17.68580 |
| H  | 19.15730 | -58.22250 | 15.77860 |
| H  | 20.61660 | -57.78350 | 16.70160 |
| H  | 20.14500 | -55.35120 | 16.17750 |
| H  | 20.81690 | -55.46510 | 13.78040 |
| H  | 21.72390 | -56.67460 | 14.72200 |
| H  | 20.34140 | -57.17240 | 13.71180 |
| H  | 18.61410 | -62.91660 | 14.52920 |
| H  | 17.21720 | -62.52100 | 13.50340 |
| H  | 18.82830 | -60.58210 | 14.05330 |
| H  | 18.23350 | -60.61960 | 15.69890 |
| H  | 15.27010 | -61.81040 | 14.85090 |
| H  | 14.85030 | -63.80780 | 17.02550 |
| H  | 13.54360 | -63.12100 | 16.03970 |
| H  | 15.16060 | -61.72460 | 18.25130 |
| H  | 13.43690 | -62.08150 | 18.24610 |
| H  | 12.39300 | -58.29990 | 15.19010 |
| H  | 16.02070 | -59.43380 | 16.98700 |
| H  | 12.34700 | -57.89390 | 13.00570 |
| H  | 17.13870 | -60.09080 | 19.24730 |
| H  | 12.00450 | -60.47880 | 16.40130 |
| P  | 17.42820 | -54.86740 | 15.78550 |
| O  | 17.44910 | -53.53470 | 14.83910 |
| O  | 16.06860 | -55.55830 | 15.62030 |
| O  | 17.89540 | -54.54280 | 17.18090 |
| C  | 16.52730 | -52.49920 | 15.17190 |
| H  | 16.70160 | -51.68000 | 14.46800 |
| H  | 15.49260 | -52.84830 | 15.07140 |
| H  | 16.69200 | -52.14070 | 16.19570 |

**1Zn-4D**

E B3LYP/6-31G(d): -3891.89195723627

E B3LYP/6-31G(d) in PCM  $\epsilon=4$ : -3891.95422950510

|   |          |           |          |
|---|----------|-----------|----------|
| C | 15.63340 | -59.89360 | 10.44490 |
| C | 15.91630 | -58.52530 | 9.78450  |
| C | 15.08540 | -57.36290 | 10.35560 |
| C | 15.19090 | -57.16890 | 11.85600 |
| O | 16.30730 | -57.22520 | 12.44070 |
| O | 14.12820 | -56.95820 | 12.55150 |
| C | 14.13830 | -60.14340 | 10.64430 |
| O | 13.35630 | -60.25940 | 9.70240  |
| N | 13.72900 | -60.16840 | 11.95090 |
| C | 12.34300 | -60.43800 | 12.32000 |
| C | 11.36370 | -59.29350 | 11.98720 |
| O | 11.61210 | -58.11900 | 12.75510 |
| C | 9.92470  | -59.71500 | 12.26890 |
| C | 16.95110 | -57.62600 | 19.06700 |
| C | 16.72140 | -58.67220 | 20.17480 |
| O | 16.23920 | -59.90800 | 19.67760 |
| C | 17.94700 | -58.10970 | 18.03140 |
| O | 17.95700 | -59.29510 | 17.63180 |
| N | 18.79680 | -57.18460 | 17.55100 |
| C | 19.62110 | -57.44000 | 16.38500 |
| C | 19.48990 | -56.30650 | 15.35460 |
| C | 20.29360 | -56.56900 | 14.08770 |
| O | 18.10240 | -56.19030 | 14.99770 |
| P | 17.14810 | -55.05170 | 15.71760 |
| O | 17.65480 | -54.69460 | 17.08390 |
| O | 15.75140 | -55.68910 | 15.58760 |
| O | 17.29080 | -53.83710 | 14.66570 |
| C | 12.26000 | -55.60700 | 9.49800  |
| C | 12.99140 | -54.28150 | 9.20850  |
| C | 12.60450 | -53.16580 | 10.13000 |
| N | 11.37910 | -52.51630 | 10.08150 |
| C | 11.34820 | -51.59080 | 11.08110 |
| N | 12.47370 | -51.60350 | 11.76250 |
| C | 13.25970 | -52.57530 | 11.18200 |
| C | 18.00770 | -62.57650 | 15.07400 |
| C | 18.26670 | -61.06510 | 14.95010 |
| C | 17.12180 | -60.30800 | 14.29990 |
| O | 17.08170 | -58.97740 | 14.50750 |
| O | 16.25450 | -60.81460 | 13.61130 |
| C | 16.93010 | -62.88370 | 16.12170 |
| O | 17.20010 | -63.22430 | 17.26710 |
| N | 15.64840 | -62.73030 | 15.67080 |
| C | 14.50000 | -62.89700 | 16.53300 |
| C | 14.15890 | -61.68830 | 17.45510 |
| C | 13.94850 | -60.41050 | 16.71040 |
| N | 12.78020 | -60.06020 | 16.04290 |

|    |          |           |          |
|----|----------|-----------|----------|
| C  | 12.99600 | -58.92110 | 15.33840 |
| N  | 14.24880 | -58.52020 | 15.50810 |
| C  | 14.83630 | -59.42500 | 16.37870 |
| C  | 10.31300 | -56.63700 | 19.27900 |
| C  | 10.68970 | -56.53770 | 17.78760 |
| C  | 10.24140 | -55.26960 | 17.12760 |
| N  | 8.90490  | -54.96090 | 16.90530 |
| C  | 8.84780  | -53.73770 | 16.30860 |
| N  | 10.05550 | -53.24300 | 16.14370 |
| C  | 10.93200 | -54.18330 | 16.64820 |
| Zn | 15.29550 | -57.09670 | 14.32430 |
| H  | 16.16230 | -59.95870 | 11.39830 |
| H  | 16.01870 | -60.68850 | 9.79560  |
| H  | 15.68900 | -58.58830 | 8.71430  |
| H  | 16.98490 | -58.30540 | 9.88210  |
| H  | 14.03550 | -57.50810 | 10.10390 |
| H  | 15.40720 | -56.42630 | 9.88030  |
| H  | 14.44510 | -60.20270 | 12.66720 |
| H  | 12.31870 | -60.64930 | 13.39210 |
| H  | 12.00360 | -61.33870 | 11.78950 |
| H  | 11.46830 | -59.07670 | 10.91660 |
| H  | 9.24460  | -58.88700 | 12.04680 |
| H  | 9.63740  | -60.57700 | 11.65720 |
| H  | 9.79400  | -59.98150 | 13.32640 |
| H  | 16.00270 | -57.44090 | 18.54490 |
| H  | 17.26910 | -56.66990 | 19.49560 |
| H  | 15.96870 | -58.29370 | 20.87420 |
| H  | 17.65630 | -58.81080 | 20.74420 |
| H  | 18.54660 | -56.19960 | 17.71510 |
| H  | 19.35330 | -58.41120 | 15.95960 |
| H  | 20.67800 | -57.53130 | 16.67540 |
| H  | 19.82220 | -55.37210 | 15.82130 |
| H  | 20.17600 | -55.73150 | 13.39470 |
| H  | 21.35870 | -56.68730 | 14.31850 |
| H  | 19.93960 | -57.47520 | 13.58280 |
| H  | 12.58350 | -56.38850 | 8.80260  |
| H  | 12.44300 | -55.94020 | 10.52300 |
| H  | 11.17510 | -55.49100 | 9.37750  |
| H  | 12.81990 | -53.98710 | 8.16280  |
| H  | 14.07290 | -54.42780 | 9.30920  |
| H  | 10.50020 | -50.94860 | 11.27260 |
| H  | 12.96150 | -50.72750 | 13.15200 |
| H  | 14.24710 | -52.79760 | 11.56140 |
| H  | 18.92540 | -63.06350 | 15.41180 |
| H  | 17.73260 | -62.98810 | 14.09690 |
| H  | 19.15830 | -60.88940 | 14.32970 |
| H  | 18.46760 | -60.63010 | 15.93580 |
| H  | 15.52060 | -62.32730 | 14.75170 |
| H  | 14.68310 | -63.76290 | 17.17660 |
| H  | 13.63940 | -63.13120 | 15.89530 |
| H  | 14.96910 | -61.53960 | 18.17400 |



|   |          |           |          |
|---|----------|-----------|----------|
| H | 13.26780 | -61.95440 | 18.04070 |
| H | 12.26720 | -58.46840 | 14.67460 |
| H | 15.85480 | -59.32690 | 16.71700 |
| H | 9.22600  | -56.60480 | 19.42530 |
| H | 10.74890 | -55.80640 | 19.84380 |
| H | 10.67990 | -57.57520 | 19.71090 |
| H | 10.27850 | -57.40670 | 17.25110 |
| H | 11.77840 | -56.60010 | 17.68030 |
| H | 7.91980  | -53.26180 | 16.02340 |
| H | 11.99830 | -54.00080 | 16.61430 |
| H | 10.63630 | -52.70160 | 9.42280  |
| H | 8.11470  | -55.55170 | 17.11990 |
| H | 10.70730 | -51.81780 | 15.45340 |
| P | 12.69130 | -50.90950 | 15.31550 |
| O | 12.81570 | -49.68460 | 16.37050 |
| O | 13.33150 | -52.17300 | 15.78960 |
| O | 13.30400 | -50.27530 | 13.98560 |
| O | 11.12160 | -50.98160 | 15.06720 |
| C | 14.11620 | -49.35230 | 16.86160 |
| H | 13.97530 | -48.60590 | 17.64750 |
| H | 14.61330 | -50.23500 | 17.27850 |
| H | 14.73460 | -48.92450 | 16.06330 |
| H | 12.48400 | -57.73940 | 12.51010 |
| H | 11.90020 | -60.55520 | 16.08710 |
| H | 16.87960 | -60.17320 | 18.98950 |
| H | 17.79280 | -58.65830 | 15.09070 |
| C | 16.70590 | -52.56420 | 15.03620 |
| H | 16.86850 | -51.90010 | 14.18510 |
| H | 15.63180 | -52.65990 | 15.22610 |
| H | 17.21180 | -52.16790 | 15.92190 |

### 1Zn-4E

E B3LYP/6-31G(d): -3891.91340141870

E B3LYP/6-31G(d) in PCM  $\epsilon=4$ : -3891.97116022729

|   |          |           |          |
|---|----------|-----------|----------|
| C | 15.51550 | -60.11170 | 10.20600 |
| C | 15.89770 | -58.78650 | 9.51870  |
| C | 15.52550 | -57.51640 | 10.31880 |
| C | 15.97860 | -57.55070 | 11.75590 |
| O | 17.24400 | -57.85150 | 11.91630 |
| O | 15.19990 | -57.32360 | 12.70470 |
| C | 14.02260 | -60.18820 | 10.52840 |
| O | 13.16570 | -60.11000 | 9.64930  |
| N | 13.72020 | -60.32200 | 11.85270 |
| C | 12.34300 | -60.43800 | 12.32000 |
| C | 11.54820 | -59.12650 | 12.16820 |
| O | 12.17180 | -58.04700 | 12.87200 |
| C | 10.13210 | -59.26070 | 12.71490 |
| C | 16.95110 | -57.62600 | 19.06700 |
| C | 16.73470 | -58.61000 | 20.23150 |

|    |          |           |          |
|----|----------|-----------|----------|
| O  | 16.32980 | -59.89630 | 19.79360 |
| C  | 18.00120 | -58.12210 | 18.09040 |
| O  | 18.12130 | -59.33600 | 17.81940 |
| N  | 18.75320 | -57.17020 | 17.51790 |
| C  | 19.62110 | -57.44000 | 16.38500 |
| C  | 19.70030 | -56.20770 | 15.46580 |
| C  | 20.64130 | -56.43940 | 14.29130 |
| O  | 18.39330 | -55.90680 | 14.91550 |
| P  | 17.34060 | -54.93040 | 15.70840 |
| O  | 17.83260 | -54.55440 | 17.07360 |
| O  | 15.99550 | -55.69870 | 15.60940 |
| O  | 17.27420 | -53.68430 | 14.68490 |
| C  | 12.26000 | -55.60700 | 9.49800  |
| C  | 12.57580 | -54.14380 | 9.13250  |
| C  | 12.31610 | -53.16960 | 10.24110 |
| N  | 11.07780 | -52.97900 | 10.83890 |
| C  | 11.22010 | -52.05400 | 11.82880 |
| N  | 12.46720 | -51.63580 | 11.89900 |
| C  | 13.15430 | -52.32270 | 10.92270 |
| C  | 17.89640 | -62.41920 | 14.86180 |
| C  | 18.15570 | -60.90120 | 14.86790 |
| C  | 17.06580 | -60.02580 | 14.25870 |
| O  | 17.26850 | -58.73780 | 14.39880 |
| O  | 16.08540 | -60.50570 | 13.66440 |
| C  | 16.89140 | -62.88650 | 15.92250 |
| O  | 17.22490 | -63.49630 | 16.93170 |
| N  | 15.58820 | -62.57570 | 15.63820 |
| C  | 14.50000 | -62.89700 | 16.53300 |
| C  | 14.17740 | -61.81500 | 17.60590 |
| C  | 13.99800 | -60.47540 | 16.98000 |
| N  | 12.84940 | -60.03220 | 16.33450 |
| C  | 13.13050 | -58.88510 | 15.66780 |
| N  | 14.40660 | -58.57220 | 15.84530 |
| C  | 14.94750 | -59.54500 | 16.66740 |
| C  | 10.31300 | -56.63700 | 19.27900 |
| C  | 10.39910 | -56.50780 | 17.74610 |
| C  | 9.91600  | -55.19340 | 17.21290 |
| N  | 8.58870  | -54.78680 | 17.27200 |
| C  | 8.50120  | -53.54700 | 16.71390 |
| N  | 9.68200  | -53.13690 | 16.30210 |
| C  | 10.57100 | -54.14890 | 16.60860 |
| Zn | 15.74120 | -57.41050 | 14.76630 |
| H  | 16.12150 | -60.26890 | 11.10440 |
| H  | 15.73860 | -60.93410 | 9.51610  |
| H  | 15.38530 | -58.72400 | 8.55300  |
| H  | 16.97500 | -58.78940 | 9.32310  |
| H  | 14.44760 | -57.34620 | 10.31060 |
| H  | 15.99770 | -56.64410 | 9.84720  |
| H  | 14.47790 | -60.36360 | 12.53060 |
| H  | 12.37620 | -60.73380 | 13.37400 |
| H  | 11.83230 | -61.22690 | 11.75360 |

|   |          |           |          |
|---|----------|-----------|----------|
| H | 11.50500 | -58.89120 | 11.09760 |
| H | 9.60000  | -58.30860 | 12.62350 |
| H | 9.57250  | -60.02500 | 12.16470 |
| H | 10.14330 | -59.54000 | 13.77690 |
| H | 16.00940 | -57.51540 | 18.51280 |
| H | 17.21000 | -56.63080 | 19.44570 |
| H | 15.94470 | -58.22830 | 20.88760 |
| H | 17.65790 | -58.66920 | 20.83300 |
| H | 18.50840 | -56.18830 | 17.68820 |
| H | 19.22610 | -58.29020 | 15.82660 |
| H | 20.63610 | -57.69060 | 16.72510 |
| H | 20.03430 | -55.34220 | 16.04930 |
| H | 20.67220 | -55.55100 | 13.65400 |
| H | 21.65710 | -56.65020 | 14.64450 |
| H | 20.30110 | -57.28730 | 13.68630 |
| H | 12.61550 | -56.29180 | 8.72020  |
| H | 12.71560 | -55.88400 | 10.45450 |
| H | 11.17950 | -55.76890 | 9.60140  |
| H | 12.01160 | -53.86620 | 8.22990  |
| H | 13.63450 | -54.05100 | 8.86500  |
| H | 10.42010 | -51.73610 | 12.48270 |
| H | 12.90790 | -50.65480 | 13.25040 |
| H | 14.21330 | -52.17090 | 10.76770 |
| H | 18.83210 | -62.93810 | 15.08440 |
| H | 17.55910 | -62.73090 | 13.86600 |
| H | 19.07180 | -60.68540 | 14.29960 |
| H | 18.34620 | -60.53380 | 15.88350 |
| H | 15.42630 | -61.98090 | 14.83210 |
| H | 14.75660 | -63.82600 | 17.05040 |
| H | 13.60470 | -63.08510 | 15.92650 |
| H | 15.00080 | -61.74880 | 18.32300 |
| H | 13.28680 | -62.12910 | 18.16680 |
| H | 12.43730 | -58.36150 | 15.02370 |
| H | 15.98270 | -59.53340 | 16.97500 |
| H | 9.27870  | -56.55380 | 19.63540 |
| H | 10.89840 | -55.85100 | 19.76670 |
| H | 10.70080 | -57.60740 | 19.60900 |
| H | 9.83800  | -57.33260 | 17.27950 |
| H | 11.44150 | -56.62810 | 17.43000 |
| H | 7.57270  | -52.99860 | 16.63450 |
| H | 11.62230 | -54.03280 | 16.37840 |
| H | 10.22130 | -53.45590 | 10.59670 |
| H | 7.82280  | -55.31140 | 17.66940 |
| H | 10.33920 | -51.75390 | 15.51220 |
| P | 12.36600 | -50.93890 | 15.33690 |
| O | 12.43120 | -49.84950 | 16.53050 |
| O | 13.00580 | -52.24480 | 15.67330 |
| O | 12.98940 | -50.13520 | 14.11060 |
| O | 10.80220 | -51.00710 | 15.01610 |
| C | 13.69340 | -49.62100 | 17.16690 |
| H | 13.49820 | -48.97620 | 18.02720 |

|   |          |           |          |
|---|----------|-----------|----------|
| H | 14.13610 | -50.56390 | 17.50400 |
| H | 14.38380 | -49.11350 | 16.48290 |
| H | 13.08950 | -57.95610 | 12.55720 |
| H | 11.94070 | -60.47240 | 16.37480 |
| H | 17.00250 | -60.14680 | 19.12810 |
| H | 17.42830 | -58.07050 | 12.88390 |
| C | 16.40470 | -52.58270 | 15.03780 |
| H | 16.47470 | -51.86600 | 14.21710 |
| H | 15.36660 | -52.90800 | 15.15170 |
| H | 16.75130 | -52.11570 | 15.96510 |

### 1Zn-TS1

E B3LYP/6-31G(d): -2713.87547485691

E B3LYP/6-31G(d) in PCM  $\epsilon=4$ : -2713.95152184311

|   |          |           |          |
|---|----------|-----------|----------|
| O | 18.04090 | -56.76590 | 14.61370 |
| P | 16.41400 | -55.63880 | 15.04100 |
| O | 16.05540 | -56.62490 | 16.15850 |
| O | 17.42480 | -54.39460 | 15.36620 |
| O | 14.90220 | -54.66790 | 15.26250 |
| O | 15.97790 | -55.92300 | 13.58700 |
| C | 17.25250 | -53.16300 | 14.66290 |
| C | 14.57780 | -54.19780 | 16.55350 |
| H | 17.77460 | -53.20210 | 13.69900 |
| H | 16.19150 | -52.96370 | 14.49610 |
| H | 17.69720 | -52.37800 | 15.28330 |
| H | 15.19550 | -53.32860 | 16.83680 |
| H | 13.52820 | -53.87360 | 16.55110 |
| H | 14.70760 | -54.97730 | 17.31480 |
| C | 12.95300 | -58.06480 | 9.34560  |
| C | 12.20140 | -56.72610 | 9.58600  |
| C | 11.69700 | -56.45420 | 11.01580 |
| C | 12.69360 | -56.66590 | 12.15080 |
| O | 13.90690 | -56.90820 | 11.91100 |
| O | 12.25960 | -56.63970 | 13.35630 |
| C | 12.31520 | -59.25300 | 10.06530 |
| O | 11.41120 | -59.92600 | 9.56850  |
| N | 12.80060 | -59.45300 | 11.32630 |
| C | 12.30310 | -60.44230 | 12.26540 |
| C | 10.79800 | -60.29730 | 12.57060 |
| O | 10.47120 | -59.11050 | 13.30440 |
| C | 10.28890 | -61.47830 | 13.39270 |
| C | 16.95100 | -57.62600 | 19.06700 |
| C | 16.97280 | -57.04280 | 20.48920 |
| O | 17.69940 | -57.85450 | 21.39300 |
| C | 18.36610 | -57.73940 | 18.50910 |
| O | 19.32840 | -58.11750 | 19.20540 |
| N | 18.45160 | -57.36980 | 17.22620 |
| C | 19.62100 | -57.44000 | 16.38500 |
| C | 19.34740 | -56.59710 | 15.10970 |

|    |          |           |          |
|----|----------|-----------|----------|
| C  | 20.37060 | -56.93220 | 14.01820 |
| C  | 17.72050 | -62.06560 | 14.65550 |
| C  | 17.75140 | -60.52860 | 14.51320 |
| C  | 16.51430 | -59.93050 | 13.84310 |
| O  | 16.43220 | -58.61690 | 13.79170 |
| O  | 15.61780 | -60.63120 | 13.37760 |
| C  | 16.81820 | -62.59070 | 15.78200 |
| O  | 17.27230 | -62.95210 | 16.86490 |
| N  | 15.48070 | -62.64200 | 15.48730 |
| C  | 14.50000 | -62.89700 | 16.53300 |
| C  | 14.26780 | -61.64130 | 17.43640 |
| C  | 13.85040 | -60.39900 | 16.70060 |
| N  | 12.55290 | -60.19100 | 16.24160 |
| C  | 12.51720 | -59.04000 | 15.52670 |
| N  | 13.71980 | -58.49060 | 15.48110 |
| C  | 14.54890 | -59.31460 | 16.22780 |
| Zn | 14.31590 | -56.90540 | 14.09640 |
| H  | 13.99060 | -57.94640 | 9.66500  |
| H  | 12.94050 | -58.28910 | 8.27420  |
| H  | 11.32690 | -56.68730 | 8.92430  |
| H  | 12.87010 | -55.91440 | 9.27650  |
| H  | 10.81960 | -57.07590 | 11.23490 |
| H  | 11.33730 | -55.41890 | 11.08770 |
| H  | 13.59850 | -58.89670 | 11.60770 |
| H  | 12.90500 | -60.36170 | 13.17260 |
| H  | 12.45980 | -61.45180 | 11.85660 |
| H  | 10.27290 | -60.28070 | 11.60900 |
| H  | 9.24240  | -61.31590 | 13.67120 |
| H  | 10.35530 | -62.40990 | 12.81960 |
| H  | 10.87400 | -61.60090 | 14.31350 |
| H  | 16.52820 | -58.63980 | 19.12660 |
| H  | 16.31570 | -57.03660 | 18.40130 |
| H  | 15.94760 | -56.96190 | 20.87350 |
| H  | 17.38350 | -56.01670 | 20.44980 |
| H  | 17.56700 | -57.13900 | 16.74710 |
| H  | 19.84920 | -58.48680 | 16.11940 |
| H  | 20.49790 | -57.06020 | 16.92450 |
| H  | 19.47140 | -55.54080 | 15.38740 |
| H  | 20.20250 | -56.29640 | 13.14300 |
| H  | 21.40220 | -56.78500 | 14.36790 |
| H  | 20.26670 | -57.97820 | 13.69970 |
| H  | 18.72780 | -62.41640 | 14.89520 |
| H  | 17.41730 | -62.50210 | 13.69740 |
| H  | 18.62210 | -60.23670 | 13.91030 |
| H  | 17.89600 | -60.04380 | 15.48700 |
| H  | 15.19520 | -62.12620 | 14.65680 |
| H  | 14.87180 | -63.71040 | 17.16090 |
| H  | 13.56510 | -63.21590 | 16.05820 |
| H  | 15.20970 | -61.44000 | 17.95610 |
| H  | 13.52910 | -61.89510 | 18.21120 |
| H  | 11.62770 | -58.69090 | 15.02700 |

|   |          |           |          |
|---|----------|-----------|----------|
| H | 15.57960 | -59.04050 | 16.38140 |
| H | 11.02670 | -58.36550 | 13.01040 |
| H | 18.51370 | -58.08590 | 20.89320 |
| H | 17.22340 | -58.02550 | 14.13930 |
| H | 11.75170 | -60.77710 | 16.42690 |

## 2Zn-1

E B3LYP/6-31G(d): -2819.15878583397

E B3LYP/6-31G(d) in PCM  $\epsilon=4$ : -2819.25452446173

|   |          |          |           |
|---|----------|----------|-----------|
| C | 90.76070 | 81.99860 | 100.79350 |
| C | 90.84520 | 83.13900 | 101.80440 |
| O | 90.67510 | 82.97260 | 103.01070 |
| N | 91.07960 | 84.37550 | 101.26080 |
| C | 91.18510 | 85.57050 | 102.08650 |
| C | 89.85470 | 85.95350 | 102.76260 |
| O | 88.81440 | 86.19250 | 101.80400 |
| C | 90.00330 | 87.21590 | 103.60320 |
| C | 89.35930 | 81.35320 | 100.75900 |
| C | 88.19950 | 82.35490 | 100.56770 |
| C | 88.38640 | 83.27940 | 99.37470  |
| O | 88.66320 | 82.80120 | 98.24320  |
| O | 88.29660 | 84.55680 | 99.53310  |
| C | 89.01140 | 89.96700 | 95.70880  |
| C | 88.72960 | 88.86720 | 94.69700  |
| O | 88.89050 | 89.01070 | 93.49890  |
| C | 87.75150 | 90.72910 | 96.13230  |
| O | 87.17270 | 91.30600 | 94.98280  |
| N | 88.25380 | 87.69510 | 95.26760  |
| C | 88.34680 | 86.48210 | 94.46810  |
| C | 87.33210 | 85.41530 | 94.88700  |
| C | 87.54620 | 84.10010 | 94.15130  |
| O | 87.40890 | 85.16480 | 96.32010  |
| C | 85.76180 | 83.78490 | 104.21910 |
| C | 84.99800 | 83.24270 | 102.99520 |
| C | 84.64620 | 84.30800 | 101.99800 |
| N | 83.36730 | 84.82210 | 101.83960 |
| C | 85.41400 | 85.01160 | 101.10520 |
| C | 83.38630 | 85.78310 | 100.89120 |
| N | 84.62240 | 85.92560 | 100.42580 |
| C | 94.23270 | 84.14120 | 97.34810  |
| C | 94.50140 | 85.61830 | 97.64680  |
| O | 95.24950 | 86.31260 | 96.96840  |
| C | 93.02480 | 83.91820 | 96.42000  |
| C | 91.65770 | 84.21560 | 97.02690  |
| O | 91.49200 | 84.32300 | 98.27280  |
| O | 90.68470 | 84.35330 | 96.20150  |
| N | 93.83990 | 86.10880 | 98.74700  |
| C | 93.92900 | 87.50700 | 99.11600  |
| C | 93.10260 | 88.46740 | 98.21540  |
| C | 91.67550 | 88.04300 | 98.18420  |

|    |          |          |           |
|----|----------|----------|-----------|
| N  | 90.84740 | 88.10480 | 99.29980  |
| C  | 90.97750 | 87.28110 | 97.28810  |
| C  | 89.72770 | 87.38270 | 99.05410  |
| N  | 89.77380 | 86.86230 | 97.83850  |
| C  | 88.41060 | 92.69080 | 101.64180 |
| C  | 88.84540 | 91.50300 | 100.76520 |
| C  | 87.89500 | 90.34250 | 100.76000 |
| N  | 87.71950 | 89.47140 | 101.82790 |
| C  | 87.06210 | 89.85760 | 99.78700  |
| C  | 86.83390 | 88.51510 | 101.48040 |
| N  | 86.40440 | 88.72280 | 100.24060 |
| Zn | 89.11370 | 84.71940 | 97.43920  |
| Zn | 85.33200 | 87.33960 | 99.09530  |
| H  | 89.18640 | 80.81770 | 101.69890 |
| H  | 89.33810 | 80.61810 | 99.94830  |
| H  | 88.07620 | 82.96040 | 101.47160 |
| H  | 87.26940 | 81.79170 | 100.41190 |
| H  | 89.49500 | 89.55870 | 96.60380  |
| H  | 89.69860 | 90.67480 | 95.23690  |
| H  | 88.03380 | 91.49550 | 96.87560  |
| H  | 87.04840 | 90.03050 | 96.62750  |
| H  | 86.46680 | 91.91300 | 95.25110  |
| H  | 88.52390 | 87.55580 | 96.23720  |
| H  | 89.35950 | 86.05600 | 94.52980  |
| H  | 88.17790 | 86.76380 | 93.42620  |
| H  | 86.31850 | 85.79210 | 94.70480  |
| H  | 86.79850 | 83.36430 | 94.46220  |
| H  | 87.45880 | 84.24880 | 93.06910  |
| H  | 88.54200 | 83.69390 | 94.36190  |
| H  | 86.01350 | 82.96650 | 104.90050 |
| H  | 86.69430 | 84.26990 | 103.91150 |
| H  | 85.16240 | 84.51700 | 104.77180 |
| H  | 84.08390 | 82.72900 | 103.31880 |
| H  | 85.61080 | 82.48510 | 102.49380 |
| H  | 86.46600 | 84.90890 | 100.87730 |
| H  | 82.51750 | 86.33250 | 100.56110 |
| H  | 95.13030 | 83.75820 | 96.85500  |
| H  | 94.08590 | 83.58260 | 98.27860  |
| H  | 93.00180 | 82.86760 | 96.10030  |
| H  | 93.12510 | 84.50520 | 95.50060  |
| H  | 93.06050 | 85.55060 | 99.07650  |
| H  | 94.97990 | 87.80450 | 99.05380  |
| H  | 93.61820 | 87.60260 | 100.16340 |
| H  | 93.51560 | 88.42950 | 97.20420  |
| H  | 93.22090 | 89.49670 | 98.58130  |
| H  | 91.28170 | 86.96430 | 96.30200  |
| H  | 88.96920 | 87.21250 | 99.80080  |
| H  | 89.14860 | 93.49650 | 101.57840 |
| H  | 87.44380 | 93.08660 | 101.31460 |
| H  | 88.31860 | 92.40630 | 102.69640 |
| H  | 89.83980 | 91.15830 | 101.08310 |

|   |          |          |           |
|---|----------|----------|-----------|
| H | 88.96030 | 91.83620 | 99.72780  |
| H | 88.21320 | 89.49840 | 102.71090 |
| H | 86.90500 | 90.24390 | 98.79140  |
| H | 86.58180 | 87.67520 | 102.10860 |
| H | 91.05950 | 88.57380 | 100.16900 |
| H | 82.54320 | 84.50500 | 102.33370 |
| H | 86.76390 | 85.79550 | 96.77650  |
| O | 83.37620 | 88.13940 | 98.52810  |
| O | 85.80610 | 86.98140 | 97.28710  |
| H | 83.35350 | 87.91980 | 97.57810  |
| H | 83.07340 | 89.05850 | 98.60860  |
| H | 91.04090 | 82.34380 | 99.79350  |
| H | 91.48820 | 81.23730 | 101.09800 |
| H | 90.32040 | 88.06680 | 102.98190 |
| H | 90.75130 | 87.07850 | 104.39130 |
| H | 89.05250 | 87.46870 | 104.08850 |
| H | 91.52930 | 86.39000 | 101.44660 |
| H | 91.93620 | 85.40930 | 102.87050 |
| H | 88.78520 | 85.45180 | 101.15580 |
| H | 89.57080 | 85.11780 | 103.41260 |
| H | 91.20100 | 84.44490 | 100.25510 |
| C | 86.15280 | 86.70520 | 97.00610  |

## 2Zn-2

E B3LYP/6-31G(d): -3389.09189510721

E B3LYP/6-31G(d) in PCM  $\epsilon=4$ : -3389.17266764346

|   |          |          |           |
|---|----------|----------|-----------|
| C | 89.63450 | 82.36400 | 100.68370 |
| C | 90.09050 | 83.37000 | 101.73640 |
| O | 89.96380 | 83.16860 | 102.94100 |
| N | 90.56740 | 84.55820 | 101.22790 |
| C | 91.18510 | 85.57050 | 102.08650 |
| C | 90.17680 | 86.20940 | 103.05600 |
| O | 89.02240 | 86.68040 | 102.33630 |
| C | 90.77300 | 87.39530 | 103.79920 |
| C | 88.10130 | 82.15680 | 100.72190 |
| C | 87.27860 | 83.44950 | 100.83580 |
| C | 87.50100 | 84.49050 | 99.75040  |
| O | 88.07150 | 84.12640 | 98.69480  |
| O | 87.13380 | 85.70490 | 99.97260  |
| C | 89.01140 | 89.96700 | 95.70880  |
| C | 89.24930 | 88.62320 | 95.06350  |
| O | 90.35660 | 88.27080 | 94.65900  |
| C | 87.85730 | 90.78010 | 95.12040  |
| O | 88.15000 | 91.00040 | 93.74890  |
| N | 88.17770 | 87.78790 | 95.04840  |
| C | 88.34680 | 86.48210 | 94.46810  |
| C | 87.19730 | 85.54470 | 94.79190  |
| C | 87.33150 | 84.19170 | 94.10480  |
| O | 87.19110 | 85.34870 | 96.23930  |



|    |          |          |           |
|----|----------|----------|-----------|
| C  | 85.76180 | 83.78490 | 104.21910 |
| C  | 84.25200 | 84.06430 | 104.08150 |
| C  | 83.98850 | 84.90090 | 102.86770 |
| N  | 82.76580 | 85.12940 | 102.25250 |
| C  | 84.88690 | 85.56920 | 102.08800 |
| C  | 82.96390 | 85.89550 | 101.14950 |
| N  | 84.25200 | 86.17470 | 101.02030 |
| C  | 93.97580 | 84.15000 | 97.29180  |
| C  | 94.39670 | 85.58630 | 97.63180  |
| O  | 95.30740 | 86.16670 | 97.05570  |
| C  | 92.71160 | 84.04660 | 96.41820  |
| C  | 91.39380 | 84.39200 | 97.10380  |
| O  | 91.30100 | 84.49710 | 98.35150  |
| O  | 90.38850 | 84.58310 | 96.31840  |
| N  | 93.68140 | 86.15880 | 98.65570  |
| C  | 93.92900 | 87.50700 | 99.11600  |
| C  | 93.10650 | 88.61510 | 98.40000  |
| C  | 91.65480 | 88.28640 | 98.42940  |
| N  | 90.83030 | 88.40160 | 99.54330  |
| C  | 90.92960 | 87.54630 | 97.54050  |
| C  | 89.67510 | 87.73740 | 99.30480  |
| N  | 89.70620 | 87.20050 | 98.09190  |
| C  | 88.41060 | 92.69080 | 101.64180 |
| C  | 86.91800 | 92.31800 | 101.73330 |
| C  | 86.69890 | 90.84070 | 101.64200 |
| N  | 87.07510 | 89.96180 | 102.64940 |
| C  | 86.24420 | 90.03270 | 100.63370 |
| C  | 86.84980 | 88.69520 | 102.24040 |
| N  | 86.34610 | 88.70170 | 101.01320 |
| Zn | 88.91880 | 85.40250 | 97.39110  |
| Zn | 85.68100 | 87.12090 | 99.81000  |
| H  | 87.84860 | 81.53960 | 101.59150 |
| H  | 87.80250 | 81.59840 | 99.82880  |
| H  | 87.48080 | 83.93050 | 101.79790 |
| H  | 86.20510 | 83.21420 | 100.84080 |
| H  | 88.82350 | 89.81440 | 96.78070  |
| H  | 89.93900 | 90.53710 | 95.60630  |
| H  | 87.78040 | 91.73190 | 95.67340  |
| H  | 86.90020 | 90.25160 | 95.24820  |
| H  | 87.38740 | 91.43460 | 93.33810  |
| H  | 87.23520 | 88.10960 | 95.26260  |
| H  | 89.29680 | 86.04960 | 94.79990  |
| H  | 88.43320 | 86.54780 | 93.37190  |
| H  | 86.25020 | 86.02780 | 94.53320  |
| H  | 86.51100 | 83.52700 | 94.39550  |
| H  | 87.30690 | 84.31000 | 93.01600  |
| H  | 88.27790 | 83.71380 | 94.38040  |
| H  | 85.95300 | 83.20730 | 105.12840 |
| H  | 86.13500 | 83.20550 | 103.37340 |
| H  | 86.33880 | 84.71120 | 104.29680 |
| H  | 83.87820 | 84.56970 | 104.98300 |

|   |          |          |           |
|---|----------|----------|-----------|
| H | 83.70260 | 83.11580 | 104.01230 |
| H | 85.95520 | 85.62120 | 102.19890 |
| H | 82.17260 | 86.21580 | 100.48730 |
| H | 94.81540 | 83.71040 | 96.74750  |
| H | 93.82630 | 83.57670 | 98.21370  |
| H | 92.61110 | 83.01740 | 96.04710  |
| H | 92.79810 | 84.67400 | 95.52390  |
| H | 92.84580 | 85.66460 | 98.94840  |
| H | 94.99170 | 87.71430 | 98.96260  |
| H | 93.73290 | 87.54570 | 100.19570 |
| H | 93.42910 | 88.67590 | 97.35650  |
| H | 93.32580 | 89.58390 | 98.86800  |
| H | 91.20370 | 87.25250 | 96.53980  |
| H | 88.87910 | 87.65140 | 100.02520 |
| H | 88.54030 | 93.77640 | 101.70030 |
| H | 88.98860 | 92.24430 | 102.45930 |
| H | 88.83920 | 92.34720 | 100.69490 |
| H | 86.36350 | 92.79810 | 100.92040 |
| H | 86.49170 | 92.70710 | 102.66770 |
| H | 87.46620 | 90.22160 | 103.54490 |
| H | 85.85920 | 90.30280 | 99.66160  |
| H | 87.13290 | 87.82370 | 102.80910 |
| H | 91.04040 | 88.90690 | 100.39310 |
| H | 81.86880 | 84.78060 | 102.56480 |
| H | 86.29020 | 85.47700 | 96.60480  |
| H | 89.95000 | 82.67570 | 99.68580  |
| H | 90.12180 | 81.40900 | 100.90950 |
| H | 91.08880 | 88.18010 | 103.09950 |
| H | 91.64390 | 87.08760 | 104.38770 |
| H | 90.03870 | 87.82620 | 104.48860 |
| H | 91.60520 | 86.33820 | 101.42900 |
| H | 92.00450 | 85.13230 | 102.67220 |
| H | 88.80350 | 85.99800 | 101.67710 |
| H | 89.86580 | 85.43980 | 103.76980 |
| H | 90.81060 | 84.56920 | 100.23890 |
| P | 84.62990 | 87.70490 | 96.83070  |
| O | 85.25610 | 88.16940 | 95.55620  |
| O | 85.32430 | 88.06570 | 98.15590  |
| O | 84.54110 | 86.05320 | 96.93060  |
| O | 83.06250 | 88.08660 | 96.93850  |
| C | 82.52680 | 89.18770 | 96.17640  |
| C | 83.63100 | 85.35610 | 96.04840  |
| H | 83.83490 | 84.29070 | 96.16830  |
| H | 82.59980 | 85.57570 | 96.33400  |
| H | 83.79780 | 85.65170 | 95.00810  |
| H | 81.44440 | 89.04920 | 96.15590  |
| H | 82.76420 | 90.13680 | 96.66750  |
| H | 82.92990 | 89.18670 | 95.16120  |

E B3LYP/6-31G(d): -3273.65793666537

E B3LYP/6-31G(d) in PCM  $\epsilon=4$ : -3273.82589951828

|   |          |          |           |
|---|----------|----------|-----------|
| C | 89.31370 | 82.61840 | 100.46160 |
| C | 89.44420 | 83.79950 | 101.42130 |
| O | 88.58500 | 84.04900 | 102.28390 |
| N | 90.57650 | 84.53020 | 101.23850 |
| C | 91.18510 | 85.57050 | 102.08650 |
| C | 90.27410 | 86.23290 | 103.13700 |
| O | 89.04560 | 86.68230 | 102.56060 |
| C | 90.97920 | 87.42670 | 103.77250 |
| C | 87.90900 | 82.01210 | 100.32700 |
| C | 86.75200 | 83.00680 | 100.04740 |
| C | 87.12910 | 84.15370 | 99.14310  |
| O | 87.60230 | 83.94080 | 97.99430  |
| O | 87.00340 | 85.38230 | 99.55030  |
| C | 89.01140 | 89.96700 | 95.70880  |
| C | 89.30910 | 88.58660 | 95.17360  |
| O | 90.42930 | 88.21510 | 94.85760  |
| C | 87.55410 | 90.29980 | 96.03860  |
| O | 86.77170 | 90.12530 | 94.86150  |
| N | 88.20750 | 87.75640 | 95.13070  |
| C | 88.34680 | 86.48210 | 94.46810  |
| C | 86.98830 | 85.77990 | 94.42890  |
| C | 87.04580 | 84.34220 | 93.94690  |
| O | 86.46750 | 85.77730 | 95.82120  |
| C | 85.76180 | 83.78490 | 104.21910 |
| C | 84.25340 | 84.00190 | 104.00430 |
| C | 84.00860 | 84.86640 | 102.80690 |
| N | 82.77650 | 85.21470 | 102.27330 |
| C | 84.91720 | 85.45200 | 101.97150 |
| C | 82.96580 | 85.96650 | 101.16430 |
| N | 84.26610 | 86.12700 | 100.94800 |
| C | 93.86810 | 83.95290 | 97.63790  |
| C | 93.77280 | 85.48160 | 97.65960  |
| O | 93.59720 | 86.11760 | 96.62470  |
| C | 92.92130 | 83.40980 | 96.56120  |
| C | 91.48470 | 83.81290 | 96.86080  |
| O | 91.04170 | 83.97830 | 97.97870  |
| O | 90.66050 | 83.99150 | 95.80130  |
| N | 93.83740 | 86.06400 | 98.89330  |
| C | 93.92900 | 87.50700 | 99.11600  |
| C | 92.89360 | 88.36840 | 98.36290  |
| C | 91.49530 | 87.87180 | 98.49350  |
| N | 90.73910 | 87.93960 | 99.65610  |
| C | 90.71280 | 87.18860 | 97.60700  |
| C | 89.56380 | 87.31190 | 99.45760  |
| N | 89.50740 | 86.86170 | 98.20680  |
| C | 88.41060 | 92.69080 | 101.64180 |
| C | 88.87270 | 91.38970 | 100.96870 |
| C | 87.88660 | 90.26450 | 101.05100 |

|    |          |          |           |
|----|----------|----------|-----------|
| N  | 87.45910 | 89.69710 | 102.24340 |
| C  | 87.24960 | 89.53940 | 100.07960 |
| C  | 86.62750 | 88.67310 | 101.97490 |
| N  | 86.47340 | 88.54560 | 100.66010 |
| Zn | 87.87100 | 85.91610 | 97.46840  |
| Zn | 85.63710 | 86.94280 | 99.65470  |
| H  | 87.64600 | 81.46760 | 101.23930 |
| H  | 87.95580 | 81.27450 | 99.51980  |
| H  | 86.37440 | 83.41630 | 100.98090 |
| H  | 85.93380 | 82.46260 | 99.55850  |
| H  | 89.63980 | 90.11390 | 96.59750  |
| H  | 89.38400 | 90.68350 | 94.96550  |
| H  | 87.49500 | 91.33930 | 96.39160  |
| H  | 87.18770 | 89.64690 | 96.84420  |
| H  | 85.87820 | 89.82130 | 95.10040  |
| H  | 87.35660 | 88.28010 | 94.90190  |
| H  | 89.08300 | 85.85860 | 94.99460  |
| H  | 88.72430 | 86.58560 | 93.44040  |
| H  | 86.28130 | 86.37110 | 93.84020  |
| H  | 86.04950 | 83.89090 | 93.94700  |
| H  | 87.42970 | 84.31390 | 92.92130  |
| H  | 87.70230 | 83.73760 | 94.58180  |
| H  | 85.92220 | 83.14880 | 105.09420 |
| H  | 86.23810 | 83.30130 | 103.36320 |
| H  | 86.27760 | 84.73290 | 104.40330 |
| H  | 83.80680 | 84.45910 | 104.89770 |
| H  | 83.74840 | 83.03540 | 103.87070 |
| H  | 85.99260 | 85.39370 | 102.01710 |
| H  | 82.16270 | 86.36740 | 100.56330 |
| H  | 94.89800 | 83.66740 | 97.39230  |
| H  | 93.62670 | 83.51940 | 98.61340  |
| H  | 92.97060 | 82.31390 | 96.51860  |
| H  | 93.22680 | 83.79780 | 95.58470  |
| H  | 94.13130 | 85.47700 | 99.66260  |
| H  | 94.92740 | 87.87470 | 98.84220  |
| H  | 93.82470 | 87.65520 | 100.19710 |
| H  | 93.14110 | 88.38650 | 97.30180  |
| H  | 92.98660 | 89.39510 | 98.74220  |
| H  | 90.94560 | 86.93400 | 96.58760  |
| H  | 88.84140 | 87.16350 | 100.24210 |
| H  | 89.17500 | 93.46540 | 101.52990 |
| H  | 87.48360 | 93.05990 | 101.19220 |
| H  | 88.23530 | 92.55650 | 102.71560 |
| H  | 89.82630 | 91.06870 | 101.41340 |
| H  | 89.07630 | 91.57280 | 99.90800  |
| H  | 87.74730 | 89.97910 | 103.17150 |
| H  | 87.29540 | 89.66230 | 99.00850  |
| H  | 86.17330 | 88.05170 | 102.73150 |
| H  | 91.01210 | 88.37250 | 100.52760 |
| H  | 81.87260 | 84.95020 | 102.64650 |
| H  | 91.14940 | 83.88580 | 94.96620  |

|   |          |          |           |
|---|----------|----------|-----------|
| H | 89.69210 | 82.91350 | 99.47770  |
| H | 89.99440 | 81.83460 | 100.82240 |
| H | 91.19040 | 88.20520 | 103.02590 |
| H | 91.92770 | 87.13420 | 104.23490 |
| H | 90.34550 | 87.86630 | 104.54840 |
| H | 91.57840 | 86.33320 | 101.40810 |
| H | 92.04550 | 85.13430 | 102.61450 |
| H | 88.56310 | 85.83480 | 102.42670 |
| H | 90.05140 | 85.49570 | 103.91770 |
| H | 91.11620 | 84.28780 | 100.41380 |
| P | 85.32810 | 86.87150 | 96.37320  |
| O | 85.02490 | 87.92670 | 95.37640  |
| O | 86.03580 | 87.22830 | 97.72290  |
| O | 84.08390 | 85.97530 | 96.84380  |
| C | 83.04540 | 85.61010 | 95.89290  |
| H | 82.20030 | 85.26460 | 96.48800  |
| H | 82.76080 | 86.47730 | 95.29370  |
| H | 83.40260 | 84.79900 | 95.25270  |

### **2Zn-3E**

E B3LYP/6-31G(d): -3273.64615829645

E B3LYP/6-31G(d) in PCM  $\epsilon=4$ : -3273.82589951828

|   |          |          |           |
|---|----------|----------|-----------|
| C | 89.45660 | 82.24830 | 101.16890 |
| C | 89.49200 | 83.64330 | 101.79450 |
| O | 88.53950 | 84.07650 | 102.47230 |
| N | 90.65230 | 84.29900 | 101.56790 |
| C | 91.18510 | 85.57050 | 102.08650 |
| C | 90.35580 | 86.27550 | 103.17320 |
| O | 89.07090 | 86.67320 | 102.68480 |
| C | 91.08350 | 87.51400 | 103.68830 |
| C | 88.07270 | 81.59420 | 101.04620 |
| C | 86.98940 | 82.40820 | 100.28740 |
| C | 87.53730 | 83.18510 | 99.12410  |
| O | 88.15120 | 82.47510 | 98.21610  |
| O | 87.41900 | 84.43170 | 99.06100  |
| C | 89.01140 | 89.96700 | 95.70880  |
| C | 89.30710 | 88.57970 | 95.18920  |
| O | 90.44400 | 88.16530 | 94.99860  |
| C | 87.60470 | 90.22750 | 96.25340  |
| O | 86.65610 | 90.10850 | 95.19510  |
| N | 88.19400 | 87.80310 | 95.00930  |
| C | 88.34680 | 86.48210 | 94.46810  |
| C | 87.08620 | 85.65120 | 94.68490  |
| C | 87.22180 | 84.20110 | 94.26230  |
| O | 86.76820 | 85.67740 | 96.15740  |
| C | 85.76180 | 83.78490 | 104.21910 |
| C | 84.28220 | 83.71750 | 103.81000 |
| C | 84.01130 | 84.61800 | 102.64620 |
| N | 82.77020 | 84.85840 | 102.07550 |

|    |          |          |           |
|----|----------|----------|-----------|
| C  | 84.88030 | 85.37160 | 101.90620 |
| C  | 82.90680 | 85.71340 | 101.04060 |
| N  | 84.18780 | 86.04590 | 100.90780 |
| C  | 93.31600 | 84.25440 | 97.13800  |
| C  | 93.51980 | 85.75070 | 97.39210  |
| O  | 93.51210 | 86.56120 | 96.47170  |
| C  | 91.95890 | 83.99090 | 96.46330  |
| C  | 90.77550 | 84.09900 | 97.41340  |
| O  | 90.89920 | 84.03300 | 98.63600  |
| O  | 89.58280 | 84.24260 | 96.82960  |
| N  | 93.66020 | 86.13310 | 98.69920  |
| C  | 93.92900 | 87.50700 | 99.11600  |
| C  | 92.93750 | 88.56710 | 98.56760  |
| C  | 91.51950 | 88.13010 | 98.69390  |
| N  | 90.75980 | 88.20650 | 99.85200  |
| C  | 90.75080 | 87.41350 | 97.82110  |
| C  | 89.59730 | 87.54260 | 99.66640  |
| N  | 89.55770 | 87.05790 | 98.42990  |
| C  | 88.41060 | 92.69080 | 101.64180 |
| C  | 88.84220 | 91.21560 | 101.61580 |
| C  | 87.70640 | 90.24060 | 101.53820 |
| N  | 86.98330 | 89.80280 | 102.63850 |
| C  | 87.15970 | 89.56870 | 100.47820 |
| C  | 86.07400 | 88.89370 | 102.24530 |
| N  | 86.15210 | 88.72420 | 100.92500 |
| Zn | 88.34020 | 85.62110 | 97.64040  |
| Zn | 85.32490 | 87.26380 | 99.77500  |
| H  | 87.67220 | 81.37590 | 102.04100 |
| H  | 88.21480 | 80.63310 | 100.54260 |
| H  | 86.50250 | 83.12240 | 100.95020 |
| H  | 86.22960 | 81.71510 | 99.90500  |
| H  | 89.76100 | 90.18830 | 96.47780  |
| H  | 89.20730 | 90.67710 | 94.89330  |
| H  | 87.56760 | 91.24150 | 96.67680  |
| H  | 87.37860 | 89.51300 | 97.05950  |
| H  | 85.85730 | 89.65680 | 95.51920  |
| H  | 87.33570 | 88.32430 | 94.82430  |
| H  | 89.20850 | 85.99590 | 94.93610  |
| H  | 88.55720 | 86.49130 | 93.38710  |
| H  | 86.23140 | 86.12900 | 94.19970  |
| H  | 86.30520 | 83.64170 | 94.47340  |
| H  | 87.40120 | 84.15640 | 93.18240  |
| H  | 88.06400 | 83.72080 | 94.76910  |
| H  | 85.93860 | 83.12140 | 105.07070 |
| H  | 86.43680 | 83.48310 | 103.41590 |
| H  | 86.03720 | 84.79810 | 104.53140 |
| H  | 83.64060 | 84.00150 | 104.65520 |
| H  | 84.00570 | 82.68640 | 103.55000 |
| H  | 85.95260 | 85.44170 | 102.01190 |
| H  | 82.08740 | 86.05910 | 100.42750 |
| H  | 94.11280 | 83.94120 | 96.45500  |

|   |          |          |           |
|---|----------|----------|-----------|
| H | 93.40280 | 83.66030 | 98.05290  |
| H | 91.93720 | 82.97850 | 96.03680  |
| H | 91.81560 | 84.67900 | 95.62400  |
| H | 93.71880 | 85.40980 | 99.40040  |
| H | 94.93760 | 87.81080 | 98.80730  |
| H | 93.91270 | 87.50830 | 100.21130 |
| H | 93.14710 | 88.72720 | 97.50970  |
| H | 93.12130 | 89.51110 | 99.09650  |
| H | 90.98770 | 87.16130 | 96.80010  |
| H | 88.89490 | 87.37810 | 100.46780 |
| H | 89.29130 | 93.33860 | 101.68620 |
| H | 87.84140 | 92.94980 | 100.74380 |
| H | 87.78720 | 92.91490 | 102.51430 |
| H | 89.45030 | 90.98810 | 102.50190 |
| H | 89.48500 | 91.04190 | 100.74510 |
| H | 87.13950 | 90.08940 | 103.59740 |
| H | 87.42720 | 89.62200 | 99.43370  |
| H | 85.39780 | 88.38310 | 102.91470 |
| H | 91.03310 | 88.65390 | 100.71670 |
| H | 81.89180 | 84.45670 | 102.38290 |
| H | 88.66530 | 83.06850 | 97.57380  |
| H | 89.94910 | 82.28460 | 100.19080 |
| H | 90.08480 | 81.60130 | 101.79610 |
| H | 91.27150 | 88.23680 | 102.88220 |
| H | 92.04700 | 87.25610 | 104.13910 |
| H | 90.47330 | 88.01100 | 104.44790 |
| H | 91.33050 | 86.24370 | 101.23750 |
| H | 92.17620 | 85.35140 | 102.50710 |
| H | 88.60680 | 85.80510 | 102.60820 |
| H | 90.22040 | 85.58030 | 104.01280 |
| H | 91.20550 | 83.91420 | 100.80970 |
| P | 85.59490 | 86.67850 | 96.75930  |
| O | 85.16790 | 87.73800 | 95.81200  |
| O | 86.27610 | 87.05680 | 98.11700  |
| O | 84.39430 | 85.71660 | 97.24740  |
| C | 83.38570 | 85.28490 | 96.29330  |
| H | 82.57450 | 84.85650 | 96.88210  |
| H | 83.02720 | 86.13600 | 95.71040  |
| H | 83.80390 | 84.51770 | 95.63590  |

### 2Zn-3B

E B3LYP/6-31G(d): -3273.34942966683

E B3LYP/6-31G(d) in PCM  $\epsilon=4$ : -3273.42725211355

|   |          |          |         |
|---|----------|----------|---------|
| C | -0.15340 | -1.51840 | 0.26280 |
| C | -0.44840 | -1.63190 | 1.75690 |
| O | 0.09320  | -2.50660 | 2.45890 |
| N | -1.32100 | -0.70450 | 2.21990 |
| C | -1.66690 | -0.34330 | 3.60440 |
| C | -1.28360 | -1.35450 | 4.69990 |

|    |          |          |          |
|----|----------|----------|----------|
| O  | -1.75700 | -2.66580 | 4.39370  |
| C  | -1.86520 | -0.93330 | 6.04620  |
| C  | 0.27580  | -2.82860 | -0.42180 |
| C  | -0.62510 | -4.06550 | -0.16080 |
| C  | -2.09130 | -3.71550 | -0.03290 |
| O  | -2.60950 | -3.01420 | -0.94260 |
| O  | -2.76220 | -4.05700 | 1.00920  |
| C  | -9.04070 | -2.55840 | 1.26980  |
| C  | -8.44420 | -1.97750 | 0.00720  |
| O  | -8.31720 | -0.76460 | -0.16150 |
| C  | -8.75280 | -4.03230 | 1.57340  |
| O  | -9.33760 | -4.86730 | 0.57420  |
| N  | -7.99300 | -2.89870 | -0.88130 |
| C  | -7.21270 | -2.49090 | -2.01330 |
| C  | -6.26200 | -3.58820 | -2.47790 |
| C  | -5.30760 | -3.13130 | -3.57030 |
| O  | -5.46790 | -4.02680 | -1.29740 |
| C  | 1.40140  | -5.57690 | 3.01790  |
| C  | 1.21690  | -7.06610 | 2.67880  |
| C  | -0.21640 | -7.32980 | 2.34750  |
| N  | -0.76850 | -8.49000 | 1.82660  |
| C  | -1.26210 | -6.45560 | 2.41070  |
| C  | -2.08700 | -8.28050 | 1.58410  |
| N  | -2.41500 | -7.04380 | 1.92580  |
| C  | -4.20680 | 2.98930  | -0.46090 |
| C  | -5.01250 | 3.13730  | 0.83570  |
| O  | -5.96380 | 3.89960  | 0.94450  |
| C  | -4.58020 | 1.75010  | -1.29650 |
| C  | -4.08930 | 0.40490  | -0.76100 |
| O  | -3.21990 | 0.32990  | 0.13550  |
| O  | -4.64860 | -0.62690 | -1.30730 |
| N  | -4.56640 | 2.35650  | 1.87650  |
| C  | -5.24200 | 2.32540  | 3.15710  |
| C  | -6.38900 | 1.27830  | 3.26400  |
| C  | -5.91660 | -0.06700 | 2.82800  |
| N  | -5.05510 | -0.88310 | 3.55370  |
| C  | -5.94690 | -0.62600 | 1.58320  |
| C  | -4.58950 | -1.86570 | 2.74490  |
| N  | -5.12320 | -1.74120 | 1.53820  |
| C  | -7.12400 | -4.22280 | 7.31440  |
| C  | -6.37850 | -3.34980 | 6.29590  |
| C  | -5.41730 | -4.11670 | 5.44330  |
| N  | -4.16460 | -4.53090 | 5.87420  |
| C  | -5.50060 | -4.55940 | 4.15100  |
| C  | -3.53760 | -5.15930 | 4.85960  |
| N  | -4.32370 | -5.19690 | 3.79170  |
| Zn | -4.41670 | -2.34220 | -0.32610 |
| Zn | -3.87040 | -5.57770 | 1.78690  |
| H  | 1.29040  | -3.09460 | -0.10750 |
| H  | 0.31650  | -2.62970 | -1.49720 |
| H  | -0.31310 | -4.58280 | 0.74220  |



|   |           |          |          |
|---|-----------|----------|----------|
| H | -0.52120  | -4.76360 | -1.00150 |
| H | -8.68670  | -1.93160 | 2.09720  |
| H | -10.12910 | -2.41050 | 1.23020  |
| H | -9.18500  | -4.27910 | 2.55510  |
| H | -7.67010  | -4.19650 | 1.62900  |
| H | -8.69500  | -5.54660 | 0.29510  |
| H | -8.38150  | -3.83690 | -0.81750 |
| H | -6.66840  | -1.57880 | -1.75410 |
| H | -7.84380  | -2.22180 | -2.87650 |
| H | -6.83110  | -4.46250 | -2.79930 |
| H | -4.61680  | -3.93350 | -3.84770 |
| H | -5.88370  | -2.85590 | -4.46100 |
| H | -4.72820  | -2.25560 | -3.26190 |
| H | 2.44820   | -5.38200 | 3.27080  |
| H | 1.13520   | -4.91810 | 2.19100  |
| H | 0.80160   | -5.28790 | 3.88730  |
| H | 1.54250   | -7.69110 | 3.52190  |
| H | 1.85440   | -7.34160 | 1.82750  |
| H | -1.24400  | -5.42160 | 2.71340  |
| H | -2.75070  | -9.02540 | 1.17040  |
| H | -4.41470  | 3.88680  | -1.04870 |
| H | -3.13430  | 2.96480  | -0.23700 |
| H | -4.15850  | 1.85470  | -2.30570 |
| H | -5.66490  | 1.68290  | -1.43640 |
| H | -3.89840  | 1.63190  | 1.63490  |
| H | -5.66260  | 3.31950  | 3.32990  |
| H | -4.49450  | 2.13560  | 3.93850  |
| H | -7.20790  | 1.58590  | 2.60690  |
| H | -6.77650  | 1.27380  | 4.29160  |
| H | -6.51300  | -0.29730 | 0.72660  |
| H | -3.83570  | -2.57210 | 3.05380  |
| H | -7.81930  | -3.61640 | 7.90400  |
| H | -7.69820  | -5.00640 | 6.80990  |
| H | -6.43260  | -4.70990 | 8.01180  |
| H | -5.84490  | -2.54380 | 6.82000  |
| H | -7.09960  | -2.86080 | 5.63160  |
| H | -3.75380  | -4.33990 | 6.77820  |
| H | -6.31320  | -4.45160 | 3.44880  |
| H | -2.53140  | -5.54260 | 4.92290  |
| H | -4.80540  | -0.77130 | 4.52640  |
| H | -0.27590  | -9.35650 | 1.65150  |
| H | -1.01690  | -1.08330 | -0.24990 |
| H | 0.66150   | -0.78870 | 0.15570  |
| H | -2.96370  | -0.94020 | 6.02040  |
| H | -1.53820  | 0.07260  | 6.32920  |
| H | -1.54360  | -1.62930 | 6.82720  |
| H | -2.74430  | -0.16930 | 3.62510  |
| H | -1.18320  | 0.61510  | 3.84460  |
| H | -1.14420  | -2.93650 | 3.67150  |
| H | -0.18990  | -1.38030 | 4.78120  |
| H | -1.80660  | -0.16190 | 1.50700  |

|   |          |          |          |
|---|----------|----------|----------|
| P | -5.84890 | -5.49910 | -0.59230 |
| O | -7.19390 | -5.96170 | -1.03350 |
| O | -5.56980 | -5.29500 | 0.90190  |
| O | -4.62950 | -6.46550 | -1.06230 |
| C | -4.64740 | -7.05390 | -2.37900 |
| H | -3.90280 | -7.85160 | -2.37350 |
| H | -5.63590 | -7.46610 | -2.59750 |
| H | -4.37260 | -6.30780 | -3.13170 |

## 2Zn-4D

E B3LYP/6-31G(d): -3956.36389047902

E B3LYP/6-31G(d) in PCM  $\epsilon=4$ : -3956.43090056175

|   |          |          |          |
|---|----------|----------|----------|
| C | -1.02130 | -0.05310 | -0.15080 |
| C | -0.71230 | -0.08380 | 1.34110  |
| O | 0.42710  | 0.01540  | 1.78710  |
| N | -1.79320 | -0.30300 | 2.15610  |
| C | -1.66690 | -0.34330 | 3.60440  |
| C | -1.15750 | -1.69200 | 4.15930  |
| O | -2.02040 | -2.78430 | 3.83750  |
| C | -1.04710 | -1.63510 | 5.67760  |
| C | -0.36490 | -1.24580 | -0.88180 |
| C | -0.60110 | -2.60990 | -0.20690 |
| C | -2.06000 | -2.94730 | 0.04530  |
| O | -2.93500 | -2.67800 | -0.83850 |
| O | -2.41670 | -3.51140 | 1.13630  |
| C | -9.04070 | -2.55840 | 1.26980  |
| C | -8.40180 | -1.98950 | 0.02000  |
| O | -8.20390 | -0.76850 | -0.14590 |
| C | -8.74400 | -4.01360 | 1.64630  |
| O | -9.43640 | -4.88330 | 0.77610  |
| N | -8.02850 | -2.89170 | -0.89800 |
| C | -7.21270 | -2.49090 | -2.01330 |
| C | -6.37870 | -3.66460 | -2.53490 |
| C | -5.43200 | -3.25470 | -3.65410 |
| O | -5.59590 | -4.18630 | -1.42930 |
| C | 1.40140  | -5.57690 | 3.01790  |
| C | 1.21070  | -7.02970 | 2.56550  |
| C | -0.21750 | -7.35720 | 2.24740  |
| N | -0.65540 | -8.65680 | 2.02880  |
| C | -1.34650 | -6.58740 | 2.12140  |
| C | -1.98920 | -8.64000 | 1.79640  |
| N | -2.43970 | -7.39360 | 1.84460  |
| C | -6.80940 | 3.74520  | 0.00710  |
| C | -6.61120 | 3.44380  | 1.48960  |
| O | -7.45870 | 3.71710  | 2.33460  |
| C | -7.17280 | 2.45900  | -0.75040 |
| C | -5.95550 | 1.60470  | -1.07860 |
| O | -4.79880 | 1.93940  | -0.90940 |
| O | -6.22420 | 0.39590  | -1.60640 |
| N | -5.44450 | 2.80110  | 1.80500  |

|    |           |          |          |
|----|-----------|----------|----------|
| C  | -5.24200  | 2.32540  | 3.15710  |
| C  | -6.11690  | 1.08820  | 3.51420  |
| C  | -5.67170  | -0.23110 | 2.95330  |
| N  | -5.08850  | -1.20590 | 3.75540  |
| C  | -5.69110  | -0.79290 | 1.69880  |
| C  | -4.78930  | -2.28470 | 3.00220  |
| N  | -5.13260  | -2.06600 | 1.74260  |
| C  | -7.12400  | -4.22280 | 7.31440  |
| C  | -6.85730  | -3.87170 | 5.84290  |
| C  | -5.86090  | -4.73710 | 5.13010  |
| N  | -4.48700  | -4.73250 | 5.36470  |
| C  | -6.02470  | -5.61030 | 4.08360  |
| C  | -3.89460  | -5.56180 | 4.46580  |
| N  | -4.80330  | -6.10850 | 3.67870  |
| Zn | -4.47770  | -3.48110 | 0.30140  |
| Zn | -4.60310  | -7.26810 | 1.86010  |
| H  | 0.71670   | -1.07920 | -0.93130 |
| H  | -0.74560  | -1.27610 | -1.90740 |
| H  | -0.05910  | -2.67030 | 0.74180  |
| H  | -0.19920  | -3.40360 | -0.85170 |
| H  | -8.76460  | -1.88630 | 2.09090  |
| H  | -10.13250 | -2.47240 | 1.16490  |
| H  | -9.09000  | -4.16980 | 2.68160  |
| H  | -7.66280  | -4.20630 | 1.63190  |
| H  | -8.79070  | -5.52610 | 0.41390  |
| H  | -8.29900  | -3.86820 | -0.78460 |
| H  | -6.52810  | -1.70790 | -1.69600 |
| H  | -7.81820  | -2.08740 | -2.84130 |
| H  | -7.04560  | -4.46340 | -2.87390 |
| H  | -4.85190  | -4.11990 | -3.98800 |
| H  | -5.99670  | -2.86520 | -4.50950 |
| H  | -4.73570  | -2.48180 | -3.31250 |
| H  | 2.44980   | -5.38680 | 3.26870  |
| H  | 1.11310   | -4.87530 | 2.22750  |
| H  | 0.79180   | -5.35640 | 3.90070  |
| H  | 1.56940   | -7.70510 | 3.35650  |
| H  | 1.84740   | -7.22650 | 1.69010  |
| H  | -1.44410  | -5.51320 | 2.17600  |
| H  | -2.62930  | -9.49890 | 1.63140  |
| H  | -7.62250  | 4.47090  | -0.06300 |
| H  | -5.90700  | 4.18670  | -0.42930 |
| H  | -7.65670  | 2.70320  | -1.70620 |
| H  | -7.89490  | 1.85290  | -0.18600 |
| H  | -4.85480  | 2.47670  | 1.04620  |
| H  | -5.53300  | 3.13160  | 3.83620  |
| H  | -4.17620  | 2.11910  | 3.30160  |
| H  | -7.14220  | 1.30910  | 3.20220  |
| H  | -6.14830  | 1.00220  | 4.60920  |
| H  | -6.12490  | -0.40860 | 0.79240  |
| H  | -4.28930  | -3.15550 | 3.38470  |
| H  | -7.87160  | -3.54360 | 7.73780  |

|   |          |           |          |
|---|----------|-----------|----------|
| H | -7.49910 | -5.24710  | 7.40810  |
| H | -6.21580 | -4.14290  | 7.92470  |
| H | -6.54760 | -2.81800  | 5.77130  |
| H | -7.79480 | -3.94060  | 5.27980  |
| H | -3.97520 | -4.16190  | 6.02470  |
| H | -6.93230 | -5.91770  | 3.58310  |
| H | -2.82780 | -5.71690  | 4.40850  |
| H | -4.89160 | -1.11720  | 4.74200  |
| H | -0.08240 | -9.48850  | 2.05320  |
| H | -7.15320 | 0.14710   | -1.41910 |
| H | -2.10050 | -0.04560  | -0.33750 |
| H | -0.61860 | 0.88250   | -0.55480 |
| H | -2.01390 | -1.36340  | 6.12400  |
| H | -0.30460 | -0.89740  | 5.99750  |
| H | -0.77160 | -2.61740  | 6.07460  |
| H | -2.64650 | -0.11650  | 4.03710  |
| H | -0.96140 | 0.43750   | 3.91280  |
| H | -1.98550 | -2.95290  | 2.87200  |
| H | -0.16300 | -1.87590  | 3.72910  |
| H | -2.71770 | -0.34010  | 1.75040  |
| P | -5.95860 | -5.70180  | -0.72940 |
| O | -7.44440 | -5.82330  | -0.77360 |
| O | -5.09430 | -5.41630  | 0.54500  |
| O | -5.17530 | -6.74450  | -1.64200 |
| C | -5.87070 | -7.85450  | -2.29590 |
| H | -5.19220 | -8.17760  | -3.08700 |
| H | -6.04710 | -8.65810  | -1.57290 |
| H | -6.81410 | -7.50510  | -2.72350 |
| O | -4.65780 | -9.33550  | 1.83200  |
| P | -6.10580 | -9.33450  | 1.21590  |
| O | -6.34550 | -10.08750 | -0.06240 |
| O | -6.43090 | -7.77650  | 1.16460  |
| O | -7.03280 | -9.95830  | 2.43480  |
| C | -8.38940 | -10.25010 | 2.12610  |
| H | -8.81270 | -10.77870 | 2.98730  |
| H | -8.96660 | -9.32950  | 1.95670  |
| H | -8.46310 | -10.88230 | 1.23420  |

## 2Zn-4E

E B3LYP/6-31G(d): -3956.37035730048

E B3LYP/6-31G(d) in PCM  $\epsilon=4$ : -3956.43614633002

|   |          |          |          |
|---|----------|----------|----------|
| C | -0.38960 | -0.53070 | -0.00190 |
| C | -0.33150 | -0.54100 | 1.52760  |
| O | 0.72080  | -0.72850 | 2.13800  |
| N | -1.53480 | -0.36580 | 2.15060  |
| C | -1.66690 | -0.34330 | 3.60440  |
| C | -1.32520 | -1.71160 | 4.22810  |
| O | -2.09310 | -2.76150 | 3.62260  |
| C | -1.60310 | -1.74340 | 5.72540  |
| C | 0.16060  | -1.83470 | -0.60860 |

|    |           |          |          |
|----|-----------|----------|----------|
| C  | -0.53480  | -3.12600 | -0.11240 |
| C  | -2.02160  | -3.17410 | -0.37030 |
| O  | -2.33750  | -3.41290 | -1.63050 |
| O  | -2.85700  | -3.00190 | 0.52850  |
| C  | -9.04070  | -2.55840 | 1.26980  |
| C  | -8.31430  | -2.00190 | 0.05930  |
| O  | -8.43400  | -0.82640 | -0.27140 |
| C  | -8.53080  | -3.88980 | 1.84610  |
| O  | -8.68390  | -4.90360 | 0.87840  |
| N  | -7.51540  | -2.89750 | -0.64550 |
| C  | -7.21270  | -2.49090 | -2.01330 |
| C  | -6.16440  | -3.35420 | -2.75360 |
| C  | -5.45410  | -2.56210 | -3.83980 |
| O  | -5.14300  | -3.87370 | -1.82380 |
| C  | 1.40140   | -5.57690 | 3.01790  |
| C  | 1.07900   | -6.87980 | 2.26830  |
| C  | -0.38080  | -7.06840 | 1.96110  |
| N  | -0.89210  | -8.27550 | 1.50090  |
| C  | -1.47530  | -6.24060 | 2.02430  |
| C  | -2.22990  | -8.14720 | 1.31540  |
| N  | -2.61380  | -6.91920 | 1.62040  |
| C  | -5.14610  | 2.61760  | -0.63660 |
| C  | -5.66800  | 2.84160  | 0.78800  |
| O  | -6.69610  | 3.46380  | 1.03890  |
| C  | -5.36250  | 1.18630  | -1.16670 |
| C  | -4.50940  | 0.08180  | -0.52660 |
| O  | -3.55690  | 0.37210  | 0.23200  |
| O  | -4.85310  | -1.11170 | -0.85190 |
| N  | -4.88250  | 2.28840  | 1.76160  |
| C  | -5.24200  | 2.32540  | 3.15710  |
| C  | -6.42480  | 1.40500  | 3.56540  |
| C  | -6.12140  | -0.00960 | 3.22370  |
| N  | -5.33270  | -0.85850 | 3.99220  |
| C  | -6.25810  | -0.65520 | 2.02970  |
| C  | -5.02670  | -1.95570 | 3.25600  |
| N  | -5.57470  | -1.86020 | 2.05650  |
| C  | -7.12400  | -4.22280 | 7.31440  |
| C  | -7.03800  | -3.80200 | 5.85090  |
| C  | -6.00140  | -4.56110 | 5.09440  |
| N  | -4.64220  | -4.54030 | 5.39400  |
| C  | -6.10220  | -5.35840 | 3.98900  |
| C  | -3.98660  | -5.28080 | 4.46260  |
| N  | -4.84700  | -5.77550 | 3.59390  |
| Zn | -5.03600  | -2.79370 | 0.25240  |
| Zn | -4.80020  | -6.66540 | 1.66770  |
| H  | 1.22010   | -1.92720 | -0.34760 |
| H  | 0.09330   | -1.78180 | -1.70110 |
| H  | -0.38220  | -3.23240 | 0.96460  |
| H  | -0.08030  | -3.98950 | -0.61040 |
| H  | -9.04290  | -1.77780 | 2.03760  |
| H  | -10.08740 | -2.69380 | 0.96070  |

|   |          |          |          |
|---|----------|----------|----------|
| H | -9.11470 | -4.10990 | 2.75850  |
| H | -7.48290 | -3.77280 | 2.15370  |
| H | -8.09180 | -5.68420 | 1.06670  |
| H | -7.80640 | -3.87960 | -0.50120 |
| H | -6.86860 | -1.46070 | -1.97040 |
| H | -8.12590 | -2.50600 | -2.62630 |
| H | -6.65430 | -4.23110 | -3.17610 |
| H | -4.76400 | -3.20260 | -4.39930 |
| H | -6.19050 | -2.16080 | -4.54630 |
| H | -4.90100 | -1.72440 | -3.40480 |
| H | 2.47390  | -5.51520 | 3.22640  |
| H | 1.12620  | -4.69640 | 2.42790  |
| H | 0.86430  | -5.52650 | 3.97110  |
| H | 1.43140  | -7.73420 | 2.86440  |
| H | 1.65950  | -6.91020 | 1.33400  |
| H | -1.52030 | -5.21030 | 2.34700  |
| H | -2.91000 | -8.93060 | 1.00470  |
| H | -5.68690 | 3.32010  | -1.27620 |
| H | -4.07830 | 2.86260  | -0.68050 |
| H | -5.14340 | 1.16600  | -2.24330 |
| H | -6.41420 | 0.88910  | -1.07560 |
| H | -4.14060 | 1.67190  | 1.43900  |
| H | -5.51870 | 3.35310  | 3.41990  |
| H | -4.34970 | 2.06640  | 3.73970  |
| H | -7.31300 | 1.73280  | 3.01870  |
| H | -6.62800 | 1.53620  | 4.63670  |
| H | -6.80810 | -0.32660 | 1.16340  |
| H | -4.37220 | -2.73880 | 3.59870  |
| H | -7.90740 | -3.66530 | 7.84020  |
| H | -7.35240 | -5.29020 | 7.40000  |
| H | -6.18250 | -4.04180 | 7.84900  |
| H | -6.84620 | -2.72070 | 5.78110  |
| H | -7.99880 | -3.97030 | 5.35310  |
| H | -4.20520 | -4.07270 | 6.17540  |
| H | -6.96970 | -5.68450 | 3.43450  |
| H | -2.91490 | -5.40000 | 4.43720  |
| H | -5.02660 | -0.68810 | 4.93970  |
| H | -0.36210 | -9.12210 | 1.34840  |
| H | -3.31760 | -3.49530 | -1.76570 |
| H | -1.40620 | -0.32720 | -0.35100 |
| H | 0.24360  | 0.29770  | -0.34320 |
| H | -2.66240 | -1.53680 | 5.93480  |
| H | -1.00010 | -0.99580 | 6.25220  |
| H | -1.35720 | -2.72760 | 6.13920  |
| H | -2.69980 | -0.06610 | 3.83630  |
| H | -0.99750 | 0.41430  | 4.03180  |
| H | -2.13100 | -2.59870 | 2.66000  |
| H | -0.25910 | -1.89280 | 4.05020  |
| H | -2.35640 | -0.21410 | 1.56310  |
| P | -5.56220 | -5.34070 | -1.04400 |
| O | -6.94890 | -5.67420 | -1.43360 |

|   |          |           |          |
|---|----------|-----------|----------|
| O | -5.10330 | -4.89050  | 0.38170  |
| O | -4.45780 | -6.41360  | -1.49200 |
| C | -4.88560 | -7.57390  | -2.27250 |
| H | -4.00080 | -8.20900  | -2.33550 |
| H | -5.70250 | -8.09170  | -1.76000 |
| H | -5.18750 | -7.25370  | -3.27370 |
| O | -5.08250 | -8.61790  | 1.28670  |
| P | -6.63800 | -8.47380  | 1.05650  |
| O | -7.18420 | -8.93090  | -0.26200 |
| O | -6.87140 | -6.93970  | 1.44140  |
| O | -7.28560 | -9.35140  | 2.29740  |
| C | -8.68270 | -9.61150  | 2.23920  |
| H | -8.91590 | -10.31490 | 3.04570  |
| H | -9.26670 | -8.69200  | 2.39180  |
| H | -8.96190 | -10.04970 | 1.27470  |

## 2Zn-TS1

E B3LYP/6-31G(d): -3389.04061872

E B3LYP/6-31G(d) in PCM  $\epsilon=4$ : -3389.11760535781

|   |          |          |           |
|---|----------|----------|-----------|
| O | 86.67860 | 85.96420 | 96.21380  |
| P | 85.24140 | 87.35610 | 97.50170  |
| O | 86.60370 | 87.85670 | 98.01170  |
| O | 84.86640 | 87.91470 | 96.03930  |
| O | 84.25020 | 88.39480 | 98.48770  |
| O | 84.67610 | 86.06900 | 98.03270  |
| C | 83.56800 | 87.58130 | 95.48130  |
| C | 84.31610 | 89.82430 | 98.34520  |
| H | 83.47850 | 86.49820 | 95.37550  |
| H | 82.77020 | 87.96540 | 96.12210  |
| H | 83.53350 | 88.06310 | 94.50400  |
| H | 83.99780 | 90.11400 | 97.33910  |
| H | 83.62910 | 90.25680 | 99.07550  |
| H | 85.32930 | 90.19570 | 98.52810  |
| C | 88.95910 | 82.79140 | 100.62310 |
| C | 89.33240 | 83.85160 | 101.66310 |
| O | 88.72200 | 83.94290 | 102.74430 |
| N | 90.37780 | 84.62940 | 101.29360 |
| C | 91.18510 | 85.57050 | 102.08650 |
| C | 90.57690 | 86.01210 | 103.42770 |
| O | 89.28320 | 86.58630 | 103.23400 |
| C | 91.46210 | 87.04800 | 104.11370 |
| C | 87.45810 | 82.47360 | 100.45270 |
| C | 86.47550 | 83.66380 | 100.47230 |
| C | 86.91420 | 84.84420 | 99.64420  |
| O | 87.36970 | 84.67960 | 98.48950  |
| O | 86.89450 | 86.03630 | 100.17390 |
| C | 89.01140 | 89.96700 | 95.70880  |
| C | 89.31750 | 88.55140 | 95.29450  |
| O | 90.44710 | 88.07060 | 95.41930  |

|    |          |          |           |
|----|----------|----------|-----------|
| C  | 87.63670 | 90.30500 | 96.27980  |
| O  | 86.61830 | 90.13990 | 95.28030  |
| N  | 88.27140 | 87.88410 | 94.76720  |
| C  | 88.34680 | 86.48210 | 94.46810  |
| C  | 87.03050 | 85.76320 | 94.82440  |
| C  | 87.08570 | 84.27580 | 94.49350  |
| C  | 85.76180 | 83.78490 | 104.21910 |
| C  | 84.27310 | 83.62370 | 103.86530 |
| C  | 83.87800 | 84.61040 | 102.81160 |
| N  | 82.93560 | 84.39410 | 101.81670 |
| C  | 84.44160 | 85.81330 | 102.48970 |
| C  | 82.97570 | 85.42150 | 100.93740 |
| N  | 83.88620 | 86.30710 | 101.32220 |
| C  | 93.12320 | 84.82800 | 96.53170  |
| C  | 93.79420 | 86.07960 | 97.10740  |
| O  | 94.62060 | 86.74670 | 96.49770  |
| C  | 91.62850 | 85.01630 | 96.20490  |
| C  | 90.69800 | 85.18810 | 97.40990  |
| O  | 91.03750 | 84.76510 | 98.53870  |
| O  | 89.58610 | 85.77820 | 97.14760  |
| N  | 93.39140 | 86.39040 | 98.38210  |
| C  | 93.92900 | 87.50700 | 99.11600  |
| C  | 93.21340 | 88.86840 | 98.87620  |
| C  | 91.76890 | 88.77000 | 99.23140  |
| N  | 91.26140 | 88.74500 | 100.52580 |
| C  | 90.73200 | 88.35300 | 98.44690  |
| C  | 89.98240 | 88.29550 | 100.49030 |
| N  | 89.62590 | 88.05560 | 99.23250  |
| C  | 88.41060 | 92.69080 | 101.64180 |
| C  | 88.32670 | 91.45250 | 102.55050 |
| C  | 87.20610 | 90.51380 | 102.20530 |
| N  | 86.12440 | 90.27890 | 103.03860 |
| C  | 86.99710 | 89.68510 | 101.13140 |
| C  | 85.33030 | 89.33810 | 102.48130 |
| N  | 85.83960 | 88.95200 | 101.31820 |
| Zn | 88.29240 | 86.64960 | 98.38480  |
| Zn | 85.24250 | 87.33520 | 100.12260 |
| H  | 87.13720 | 81.79170 | 101.24840 |
| H  | 87.35010 | 81.92820 | 99.50950  |
| H  | 86.32120 | 84.01360 | 101.48920 |
| H  | 85.50680 | 83.32540 | 100.07880 |
| H  | 89.78470 | 90.26950 | 96.42320  |
| H  | 89.17290 | 90.60450 | 94.82570  |
| H  | 87.64940 | 91.35680 | 96.59960  |
| H  | 87.42300 | 89.68380 | 97.15120  |
| H  | 85.90430 | 89.59660 | 95.64970  |
| H  | 87.41970 | 88.41620 | 94.61520  |
| H  | 89.16830 | 86.05980 | 95.04080  |
| H  | 88.53770 | 86.31200 | 93.39650  |
| H  | 86.21200 | 86.23350 | 94.26390  |
| H  | 86.13120 | 83.79070 | 94.72320  |



|   |          |          |           |
|---|----------|----------|-----------|
| H | 87.29740 | 84.12240 | 93.42980  |
| H | 87.87790 | 83.78210 | 95.06920  |
| H | 86.02170 | 83.10130 | 105.03460 |
| H | 86.43310 | 83.57300 | 103.38770 |
| H | 85.97580 | 84.79700 | 104.57980 |
| H | 83.65560 | 83.74970 | 104.76550 |
| H | 84.07950 | 82.60500 | 103.50410 |
| H | 85.24950 | 86.32720 | 102.98680 |
| H | 82.37500 | 85.48270 | 100.04220 |
| H | 93.66060 | 84.58650 | 95.61120  |
| H | 93.24120 | 83.99220 | 97.23140  |
| H | 91.27460 | 84.13480 | 95.65070  |
| H | 91.47960 | 85.88000 | 95.54990  |
| H | 92.67910 | 85.79860 | 98.79610  |
| H | 94.97870 | 87.62870 | 98.82870  |
| H | 93.90380 | 87.26230 | 100.18540 |
| H | 93.29820 | 89.12030 | 97.81510  |
| H | 93.73050 | 89.65050 | 99.44800  |
| H | 90.73780 | 88.21510 | 97.37340  |
| H | 89.40090 | 88.08420 | 101.37850 |
| H | 89.25400 | 93.32220 | 101.93960 |
| H | 88.55670 | 92.40310 | 100.59540 |
| H | 87.49770 | 93.29300 | 101.70200 |
| H | 88.22550 | 91.76310 | 103.59810 |
| H | 89.27130 | 90.89720 | 102.49360 |
| H | 85.95620 | 90.73720 | 103.92470 |
| H | 87.60110 | 89.55630 | 100.24650 |
| H | 84.42200 | 88.96650 | 102.93240 |
| H | 91.76870 | 88.97960 | 101.36870 |
| H | 82.31650 | 83.59610 | 101.75470 |
| H | 89.40750 | 83.05360 | 99.65990  |
| H | 89.46480 | 81.86910 | 100.94190 |
| H | 91.56560 | 87.95120 | 103.49670 |
| H | 92.46420 | 86.65260 | 104.31060 |
| H | 91.01450 | 87.34780 | 105.06590 |
| H | 91.36250 | 86.44630 | 101.46040 |
| H | 92.16280 | 85.10510 | 102.28350 |
| H | 88.71580 | 85.79830 | 103.08900 |
| H | 90.48410 | 85.13550 | 104.07880 |
| H | 90.66990 | 84.55120 | 100.31640 |
| H | 86.89630 | 85.19140 | 96.78220  |

### 1Zn-2u

E B3LYP/6-31G(d): -2713.99462739064

|   |          |           |          |
|---|----------|-----------|----------|
| C | 16.60010 | -60.57600 | 9.58720  |
| C | 16.67690 | -59.11540 | 9.10080  |
| C | 15.65490 | -58.18450 | 9.78100  |
| C | 15.78830 | -58.17010 | 11.29850 |
| O | 16.89690 | -57.84840 | 11.81810 |
| O | 14.79170 | -58.49090 | 12.02660 |
| C | 15.19840 | -61.15130 | 9.39020  |

|    |          |           |          |
|----|----------|-----------|----------|
| O  | 14.67320 | -61.21600 | 8.27530  |
| N  | 14.57660 | -61.54580 | 10.53270 |
| C  | 13.20070 | -62.00600 | 10.53310 |
| C  | 12.18980 | -60.84890 | 10.65760 |
| O  | 12.41560 | -60.08950 | 11.83840 |
| C  | 10.75540 | -61.36540 | 10.71540 |
| C  | 18.38820 | -55.54320 | 19.10070 |
| C  | 19.10110 | -54.83260 | 20.26310 |
| O  | 19.89900 | -55.71720 | 21.02490 |
| C  | 19.39820 | -56.13770 | 18.12320 |
| O  | 20.42400 | -56.71580 | 18.53250 |
| N  | 19.10910 | -55.98680 | 16.81930 |
| C  | 19.90920 | -56.58760 | 15.76730 |
| C  | 19.03780 | -56.93400 | 14.55570 |
| C  | 19.85400 | -57.46070 | 13.37750 |
| O  | 18.01450 | -57.87320 | 14.94240 |
| C  | 16.95840 | -63.74240 | 14.82710 |
| C  | 17.50500 | -62.30080 | 14.81970 |
| C  | 16.77470 | -61.30240 | 13.89590 |
| O  | 17.12950 | -60.08590 | 14.04180 |
| O  | 15.92630 | -61.73500 | 13.08130 |
| C  | 15.62910 | -63.89710 | 15.57370 |
| O  | 15.55290 | -64.38770 | 16.70040 |
| N  | 14.53830 | -63.45220 | 14.88180 |
| C  | 13.23150 | -63.36730 | 15.50260 |
| C  | 13.07970 | -62.17970 | 16.49330 |
| C  | 13.43380 | -60.85830 | 15.89210 |
| N  | 12.65880 | -60.19340 | 14.94850 |
| C  | 13.35280 | -59.11640 | 14.51190 |
| N  | 14.52070 | -59.02680 | 15.12200 |
| C  | 14.57350 | -60.10180 | 15.99060 |
| Zn | 16.12590 | -58.16270 | 13.82580 |
| H  | 16.90810 | -60.64380 | 10.63640 |
| H  | 17.29710 | -61.18440 | 8.99670  |
| H  | 16.50050 | -59.09620 | 8.01910  |
| H  | 17.68730 | -58.73360 | 9.28540  |
| H  | 14.63520 | -58.47430 | 9.51090  |
| H  | 15.81430 | -57.15900 | 9.42270  |
| H  | 15.04690 | -61.42800 | 11.43210 |
| H  | 13.06800 | -62.69240 | 11.37910 |
| H  | 13.01940 | -62.55310 | 9.60170  |
| H  | 12.30880 | -60.21000 | 9.76840  |
| H  | 10.05290 | -60.52930 | 10.79940 |
| H  | 10.50610 | -61.94250 | 9.81750  |
| H  | 10.61790 | -62.01390 | 11.59090 |
| H  | 17.79660 | -56.37180 | 19.51370 |
| H  | 17.69940 | -54.86660 | 18.58250 |
| H  | 18.35580 | -54.39650 | 20.94030 |
| H  | 19.69910 | -53.99480 | 19.85910 |
| H  | 18.22690 | -55.53060 | 16.54450 |
| H  | 20.40420 | -57.48070 | 16.16580 |

|   |          |           |          |
|---|----------|-----------|----------|
| H | 20.70460 | -55.89890 | 15.44140 |
| H | 18.48170 | -56.04190 | 14.25430 |
| H | 19.19320 | -57.69320 | 12.53810 |
| H | 20.58670 | -56.71260 | 13.05190 |
| H | 20.40620 | -58.36890 | 13.65770 |
| H | 17.67130 | -64.40030 | 15.33280 |
| H | 16.84380 | -64.08000 | 13.79100 |
| H | 18.55480 | -62.31820 | 14.49550 |
| H | 17.51730 | -61.88460 | 15.83430 |
| H | 14.74540 | -62.87840 | 14.06210 |
| H | 13.04760 | -64.29760 | 16.04930 |
| H | 12.48510 | -63.29190 | 14.70260 |
| H | 13.74930 | -62.36640 | 17.33820 |
| H | 12.05290 | -62.17960 | 16.88780 |
| H | 12.99870 | -58.46000 | 13.73410 |
| H | 15.43450 | -60.27350 | 16.62030 |
| H | 13.27290 | -59.61410 | 11.75210 |
| H | 20.37540 | -56.24590 | 20.34760 |
| H | 11.84140 | -60.54520 | 14.46960 |
| H | 18.30990 | -58.79910 | 14.82730 |
| P | 15.53020 | -55.08350 | 15.18350 |
| O | 16.70290 | -54.75400 | 16.06160 |
| O | 15.09680 | -53.74670 | 14.36220 |
| O | 14.16900 | -55.28480 | 16.08150 |
| O | 15.63220 | -56.22610 | 14.17670 |
| C | 14.09250 | -53.84930 | 13.35550 |
| C | 14.24360 | -56.09570 | 17.25120 |
| H | 14.04940 | -52.87910 | 12.85070 |
| H | 14.34050 | -54.63180 | 12.63100 |
| H | 13.11310 | -54.06590 | 13.80080 |
| H | 13.27850 | -56.00910 | 17.76080 |
| H | 14.41760 | -57.14700 | 16.99460 |
| H | 15.03930 | -55.74590 | 17.91840 |

### 1Zn-2u

E B3LYP/6-31G(d): -2713.92274008592

|   |          |           |          |
|---|----------|-----------|----------|
| O | 19.89600 | -58.07340 | 14.64170 |
| P | 19.02930 | -56.89090 | 16.05140 |
| O | 19.11870 | -58.07840 | 17.00810 |
| O | 20.41720 | -55.98590 | 15.91530 |
| O | 18.30560 | -55.72380 | 17.15520 |
| O | 17.93720 | -56.57040 | 14.97640 |
| C | 20.35060 | -54.69730 | 15.31770 |
| C | 18.87190 | -55.63550 | 18.44460 |
| H | 20.13430 | -54.77300 | 14.24190 |
| H | 19.58890 | -54.07540 | 15.80040 |
| H | 21.33700 | -54.23380 | 15.44590 |
| H | 19.88560 | -55.18900 | 18.42940 |
| H | 18.23050 | -54.98210 | 19.05810 |
| H | 18.94400 | -56.62350 | 18.92370 |
| C | 17.70340 | -60.47910 | 10.54320 |

|    |          |           |          |
|----|----------|-----------|----------|
| C  | 17.30190 | -59.21890 | 9.74670  |
| C  | 16.02010 | -58.50410 | 10.23120 |
| C  | 16.11080 | -57.94230 | 11.64690 |
| O  | 17.17900 | -57.39380 | 12.03000 |
| O  | 15.10880 | -58.04230 | 12.44470 |
| C  | 16.59140 | -61.52570 | 10.53140 |
| O  | 16.21690 | -62.06450 | 9.47590  |
| N  | 16.01680 | -61.77970 | 11.73330 |
| C  | 14.86970 | -62.65920 | 11.89200 |
| C  | 13.54680 | -61.94650 | 11.56750 |
| O  | 13.32390 | -60.82790 | 12.44170 |
| C  | 12.36350 | -62.89540 | 11.73320 |
| C  | 21.84980 | -60.33320 | 18.78670 |
| C  | 21.89800 | -61.71870 | 19.44170 |
| O  | 21.00000 | -62.66940 | 18.87950 |
| C  | 22.32800 | -60.34650 | 17.33320 |
| O  | 23.32350 | -61.00180 | 16.98490 |
| N  | 21.60080 | -59.59000 | 16.48490 |
| C  | 21.88480 | -59.51250 | 15.06080 |
| C  | 21.28560 | -58.24000 | 14.42870 |
| C  | 21.57840 | -58.25950 | 12.92300 |
| C  | 18.67020 | -62.45480 | 16.42890 |
| C  | 18.89490 | -61.11030 | 15.71170 |
| C  | 17.81160 | -60.68370 | 14.73720 |
| O  | 17.97210 | -59.52300 | 14.13020 |
| O  | 16.83450 | -61.39960 | 14.48440 |
| C  | 17.72790 | -62.33830 | 17.62130 |
| O  | 18.13390 | -62.22530 | 18.78960 |
| N  | 16.40850 | -62.37100 | 17.29940 |
| C  | 15.33940 | -62.08110 | 18.24460 |
| C  | 15.14260 | -60.57250 | 18.54620 |
| C  | 14.95570 | -59.72510 | 17.32460 |
| N  | 13.86450 | -59.80610 | 16.46740 |
| C  | 14.09130 | -58.99410 | 15.40880 |
| N  | 15.26510 | -58.39000 | 15.53100 |
| C  | 15.80980 | -58.83630 | 16.72360 |
| Zn | 16.36380 | -57.28530 | 14.07750 |
| H  | 17.98570 | -60.19870 | 11.56360 |
| H  | 18.58480 | -60.92790 | 10.06570 |
| H  | 17.16860 | -59.50310 | 8.69580  |
| H  | 18.13750 | -58.51030 | 9.78940  |
| H  | 15.14370 | -59.15870 | 10.14740 |
| H  | 15.83040 | -57.64700 | 9.56680  |
| H  | 16.40290 | -61.39450 | 12.59710 |
| H  | 14.85240 | -62.98650 | 12.93560 |
| H  | 14.98720 | -63.53650 | 11.24180 |
| H  | 13.60060 | -61.60390 | 10.52380 |
| H  | 11.42280 | -62.38110 | 11.51220 |
| H  | 12.45870 | -63.75810 | 11.05770 |
| H  | 12.31310 | -63.26670 | 12.76320 |
| H  | 20.84410 | -59.90360 | 18.86660 |

|   |          |           |          |
|---|----------|-----------|----------|
| H | 22.52510 | -59.67060 | 19.34740 |
| H | 21.72220 | -61.60730 | 20.52320 |
| H | 22.90140 | -62.13580 | 19.31000 |
| H | 20.76820 | -59.08170 | 16.80680 |
| H | 21.49660 | -60.40130 | 14.53880 |
| H | 22.97180 | -59.52300 | 14.91970 |
| H | 21.79940 | -57.38630 | 14.87990 |
| H | 21.23760 | -57.32950 | 12.46510 |
| H | 22.64960 | -58.38010 | 12.71660 |
| H | 21.04680 | -59.08760 | 12.44220 |
| H | 19.63080 | -62.80240 | 16.81620 |
| H | 18.29040 | -63.19810 | 15.72020 |
| H | 19.81980 | -61.18310 | 15.13130 |
| H | 19.04190 | -60.28660 | 16.41850 |
| H | 16.20600 | -62.29020 | 16.30480 |
| H | 15.55520 | -62.60470 | 19.18110 |
| H | 14.41870 | -62.51300 | 17.83750 |
| H | 16.02820 | -60.20560 | 19.07380 |
| H | 14.29510 | -60.47440 | 19.23930 |
| H | 13.40940 | -58.89390 | 14.57720 |
| H | 16.78480 | -58.50330 | 17.05850 |
| H | 14.03940 | -60.17520 | 12.30420 |
| H | 20.07360 | -62.34950 | 18.97350 |
| H | 13.01130 | -60.33460 | 16.61800 |
| H | 18.89440 | -58.96990 | 14.35640 |

## 2Zn-2p

E B3LYP/6-31G(d): -2819.50379369929

|   |          |          |          |
|---|----------|----------|----------|
| C | 0.25380  | -1.57670 | -0.15750 |
| C | 0.05590  | -1.59720 | 1.35790  |
| O | 0.75110  | -2.27820 | 2.11240  |
| N | -0.97140 | -0.81320 | 1.80580  |
| C | -1.25010 | -0.53430 | 3.21050  |
| C | -1.42760 | -1.78210 | 4.10080  |
| O | -2.25690 | -2.78420 | 3.48790  |
| C | -2.03810 | -1.41680 | 5.44680  |
| C | 0.49940  | -2.96440 | -0.77800 |
| C | -0.52640 | -4.05380 | -0.37360 |
| C | -1.95330 | -3.55170 | -0.41710 |
| O | -2.44530 | -3.15370 | -1.52220 |
| O | -2.64570 | -3.44540 | 0.65880  |
| C | -9.04070 | -2.55840 | 1.26980  |
| C | -8.81150 | -2.87870 | -0.19700 |
| O | -9.68480 | -3.33250 | -0.91810 |
| C | -8.12170 | -3.26690 | 2.26210  |
| O | -7.91360 | -4.66810 | 1.95070  |
| N | -7.53630 | -2.62280 | -0.61320 |
| C | -7.21270 | -2.49090 | -2.01330 |
| C | -6.24790 | -3.57670 | -2.50110 |
| C | -5.69130 | -3.28770 | -3.88530 |
| O | -5.13260 | -3.68400 | -1.52190 |

|    |           |          |          |
|----|-----------|----------|----------|
| C  | 1.40140   | -5.57690 | 3.01790  |
| C  | 1.14700   | -6.82010 | 2.15330  |
| C  | -0.30490  | -7.03280 | 1.84660  |
| N  | -0.78840  | -8.14530 | 1.17110  |
| C  | -1.41840  | -6.27670 | 2.10400  |
| C  | -2.12620  | -8.04560 | 1.04070  |
| N  | -2.54780  | -6.91390 | 1.59920  |
| C  | -3.62330  | 2.76430  | -0.30810 |
| C  | -4.74780  | 2.59610  | 0.71670  |
| O  | -5.93200  | 2.61520  | 0.39280  |
| C  | -3.84030  | 1.85240  | -1.52960 |
| C  | -3.79210  | 0.37650  | -1.18100 |
| O  | -2.94670  | -0.06610 | -0.33350 |
| O  | -4.62460  | -0.43160 | -1.71490 |
| N  | -4.34350  | 2.37190  | 2.00690  |
| C  | -5.24200  | 2.32540  | 3.15710  |
| C  | -6.45880  | 1.38230  | 3.01700  |
| C  | -6.02340  | 0.05750  | 2.50510  |
| N  | -5.34390  | -0.88370 | 3.26290  |
| C  | -5.92050  | -0.39330 | 1.21930  |
| C  | -4.84790  | -1.83720 | 2.44110  |
| N  | -5.18740  | -1.57090 | 1.18620  |
| C  | -7.12400  | -4.22280 | 7.31440  |
| C  | -5.81220  | -3.63200 | 6.77230  |
| C  | -5.16000  | -4.47440 | 5.71080  |
| N  | -3.90000  | -5.03030 | 5.86030  |
| C  | -5.56050  | -4.86550 | 4.45730  |
| C  | -3.56620  | -5.69630 | 4.74070  |
| N  | -4.56040  | -5.62110 | 3.85830  |
| Zn | -3.93770  | -2.00150 | -0.50170 |
| Zn | -4.45730  | -6.23100 | 1.89430  |
| H  | 1.49020   | -3.32750 | -0.48760 |
| H  | 0.49830   | -2.85040 | -1.86650 |
| H  | -0.31170  | -4.40430 | 0.63490  |
| H  | -0.43100  | -4.90020 | -1.06480 |
| H  | -8.95520  | -1.47670 | 1.43930  |
| H  | -10.08300 | -2.82490 | 1.47890  |
| H  | -8.54170  | -3.17990 | 3.27210  |
| H  | -7.11930  | -2.84700 | 2.27320  |
| H  | -8.76020  | -5.05710 | 1.67310  |
| H  | -6.92310  | -2.15620 | 0.03790  |
| H  | -6.77460  | -1.50460 | -2.19780 |
| H  | -8.14050  | -2.57910 | -2.58650 |
| H  | -6.75340  | -4.54880 | -2.47410 |
| H  | -5.02390  | -4.08850 | -4.22610 |
| H  | -6.51040  | -3.21790 | -4.60940 |
| H  | -5.14350  | -2.33920 | -3.89400 |
| H  | 2.46770   | -5.50660 | 3.25090  |
| H  | 1.11480   | -4.64510 | 2.52230  |
| H  | 0.86220   | -5.64670 | 3.96950  |
| H  | 1.53710   | -7.71190 | 2.66370  |

|   |          |          |          |
|---|----------|----------|----------|
| H | 1.70560  | -6.74160 | 1.21010  |
| H | -1.48030 | -5.30730 | 2.57500  |
| H | -2.74600 | -8.78980 | 0.56270  |
| H | -3.63990 | 3.80800  | -0.64370 |
| H | -2.64050 | 2.57380  | 0.13440  |
| H | -3.05650 | 2.04790  | -2.27270 |
| H | -4.80300 | 2.06760  | -1.99790 |
| H | -3.35850 | 2.47450  | 2.20700  |
| H | -5.62510 | 3.32980  | 3.38450  |
| H | -4.63150 | 2.01870  | 4.01370  |
| H | -7.16760 | 1.81630  | 2.31210  |
| H | -6.94980 | 1.31010  | 3.99590  |
| H | -6.26350 | 0.09690  | 0.32050  |
| H | -4.20640 | -2.63010 | 2.78880  |
| H | -7.54810 | -3.56570 | 8.07980  |
| H | -7.86890 | -4.33720 | 6.51960  |
| H | -6.95920 | -5.20620 | 7.76660  |
| H | -5.10390 | -3.48720 | 7.59710  |
| H | -6.00600 | -2.63130 | 6.36460  |
| H | -3.30870 | -4.93340 | 6.67660  |
| H | -6.50130 | -4.69120 | 3.95750  |
| H | -2.62330 | -6.20000 | 4.59590  |
| H | -5.18600 | -0.84170 | 4.26100  |
| H | -0.22600 | -8.91660 | 0.83130  |
| H | -4.30940 | -3.92280 | -1.99790 |
| O | -5.52030 | -8.06840 | 1.61680  |
| O | -5.71160 | -5.37280 | 0.56760  |
| H | -5.42900 | -4.76910 | -0.17500 |
| H | -6.22460 | -8.07990 | 0.94670  |
| H | -5.76980 | -8.70380 | 2.30870  |
| H | -0.59540 | -1.08790 | -0.64690 |
| H | 1.13110  | -0.94760 | -0.35750 |
| H | -3.02970 | -0.96020 | 5.32540  |
| H | -1.40240 | -0.70570 | 5.98470  |
| H | -2.14580 | -2.30890 | 6.07290  |
| H | -2.16900 | 0.06410  | 3.22460  |
| H | -0.44830 | 0.07390  | 3.65190  |
| H | -2.02240 | -2.85030 | 2.53950  |
| H | -0.43300 | -2.21170 | 4.25920  |
| H | -1.52140 | -0.31150 | 1.11440  |
| H | -6.58230 | -5.03060 | 0.92620  |
